# Interplay Between the Gut Microbiome and Typhoid Fever: Insights from Endemic Countries and a Controlled Human Infection Model

Philip M. Ashton<sup>1,2</sup>, Leonardos Mageiros<sup>3</sup>, James E. Meiring<sup>1,4</sup>, Angeziwa Chunga Chirambo<sup>1,5</sup>, Farhana Khanam<sup>6</sup>, Happy Banda<sup>1</sup>, Abhilasha Karkey<sup>7,8</sup>, Sabina Dongol<sup>7,8</sup>, Lorena Preciado Llanes<sup>9</sup>, Helena Thomaidis-Brears<sup>10</sup>, Malick Gibani<sup>10,11</sup>, Nazmul Hasan Rajib<sup>6</sup>, Nazia Rahman<sup>6</sup>, Prasanta Kumar Biswas<sup>6</sup>, Md Amirul Islam Bhuiyan<sup>6</sup>, Sally Kay<sup>7</sup>, Kate Auger<sup>7</sup>, Olivier Seret<sup>7</sup>, Nicholas R. Thomson<sup>7,8</sup>, Andrew J Pollard<sup>12,14</sup>, Stephen Baker<sup>15</sup>, Buddha Basnyat<sup>9,17</sup>, John D. Clemens<sup>6</sup>, Christiane Dolecek<sup>17</sup>, Sarah J. Dunstan<sup>18</sup>, Gordon Dougan<sup>15,16</sup>, Robert S. Heyderman<sup>19</sup>, Virginia E. Pitzer<sup>20</sup>, Firdausi Qadri<sup>6</sup>, Melita A. Gordon<sup>1,2</sup>, Thomas C. Darton<sup>4\*</sup>, Kathryn E. Holt<sup>3,8\*</sup>, STRATAA Study Group<sup>21</sup>

1. Malawi-Liverpool-Wellcome Programme, Blantyre, Malawi
2. Institute of Infection, Veterinary and Ecological Sciences, University of Liverpool, Liverpool, UK
3. Department of Infectious Diseases, School of Translational Medicine, Monash University, Melbourne, Victoria, Australia
4. Clinical Infection Research Group, Division of Clinical Medicine, School of Medicine & Population Health, and The Florey Institute for Infection, University of Sheffield, UK
5. Department of Medical Laboratory Sciences, School of Life Sciences and Allied Health Professions, Kamuzu University of Health Sciences, Malawi
6. International Centre for Diarrhoeal Diseases Research, Bangladesh, Dhaka, Bangladesh
7. Wellcome Sanger Institute, Hinxton, UK
8. Department of Infection Biology, London School of Hygiene & Tropical Medicine, London, UK
9. Oxford University Clinical Research Unit, Patan Academy of Health Sciences, Kathmandu, Nepal
10. Patan Academy of Health Sciences, Patan Hospital, Lalitpur, Nepal
11. MRC Human Immunology Unit, MRC Weatherall Institute of Molecular Medicine, University of Oxford, Oxford, OX3 9DS, UK.
12. Oxford Vaccine Group, Department of Paediatrics, University of Oxford, Oxford, UK
13. Department of Infectious Disease, Imperial College London, London, UK
14. NIHR Oxford Biomedical Research Centre, Oxford, UK
15. Department of Medicine, University of Cambridge, Cambridge, UK
16. Centre for Translational Stem Cell Biology, Hong Kong
17. Nuffield Department of Medicine, Centre for Tropical Medicine and Global Health, University of Oxford, Oxford, UK
18. Department of Infectious Diseases, The University of Melbourne at The Peter Doherty Institute for Infection and Immunity, Melbourne, Australia
19. Research Department of Infection, Division of Infection and Immunity, University College London, London, UK

20. Department of Epidemiology of Microbial Diseases, Yale School of Public Health, Yale University, New Haven, CT, USA

21. Strategic Typhoid Alliance Across Asia and Africa Consortium

\* contributed equally

Working title: Gut microbiome in relation to typhoid fever

## Abstract

Typhoid fever is a systemic infection caused by *Salmonella enterica* serovar Typhi (*S. Typhi*) bacteria invading through the gut lumen. Transmission occurs through ingestion of contaminated food and water, particularly in settings with poor water, sanitation and hygiene infrastructure, resulting in over 10 million illnesses annually. It is well established that vaccines and natural infections can stimulate protective immunity against *S. Typhi*. As the pathogen invades through the gastrointestinal tract, it is plausible that the gut microbiome may also influence the outcome of *S. Typhi* exposure. There is some evidence that bacteria producing short-chain fatty acids (SCFAs) may create an environment unfavourable to invasive *Salmonella*, but data from humans is very limited.

To investigate the association between gut microbiome and typhoid fever, we analysed samples collected from three all-age cohorts recruited in a prospective surveillance study conducted in parallel in three settings where typhoid fever is endemic (Dhaka, Bangladesh; Blantyre, Malawi; and Kathmandu, Nepal). Cohorts consisted of acute typhoid fever patients (n=92), asymptomatic household contacts of typhoid fever patients (representing individuals who were likely exposed to *S. Typhi* but did not develop disease, n=97), and asymptomatic serosurvey participants with high Vi antibody titres (representing individuals who were exposed to *S. Typhi* and may be carriers, n=69). The stool microbiomes of each cohort were characterised using shotgun metagenomics, and bacterial composition and diversity were compared.

We identified four bacterial species and 28 metabolic gene clusters (MGCs) that were significantly lower in abundance in typhoid fever patients compared with household contacts (i.e. probably exposed), in two of the three host populations (Bangladesh and Malawi). These may represent taxa that provide protection against development of clinical infection upon exposure to *S. Typhi*, and include the inflammation-associated species *Prevotella copri* clade A

and *Haemophilus parainfluenzae*, and seven MGCs involved in SCFA metabolism. The putative protection provided by SCFA metabolism was supported by data from a controlled human infection model conducted in a UK population, in which participants who did not develop typhoid fever following ingestion of *S. Typhi* had significantly higher abundance of a putative SCFA-metabolising MGC (q-value = 0.22).

This study identified the same associations between taxonomic and functional microbiota characteristics and non-susceptibility to typhoid fever across multiple cohorts. Future research should explore the potential functional role of SCFAs and inflammation-associated bacteria in resistance to *S. Typhi* and other enteric infections.

## Introduction

Typhoid fever, caused by invasive *Salmonella enterica* serovar Typhi (*S. Typhi*) infection (Meiring et al. 2023), causes an estimated 10.9 million illnesses and 116,800 deaths per year disproportionately affecting people in South and Southeast Asia and sub-Saharan Africa (Stanaway et al. 2019). The introduction of typhoid conjugate vaccines is expected to decrease the number of typhoid fever cases in these settings, along with improvements in water, sanitation and hygiene (WASH). However, the large burden of disease, the role of asymptomatic gall bladder carriage as a source of infection, and the fact that typhoid fever impacts the impoverished and marginalised, means that eradicating this infection will be difficult (Meiring et al. 2021; Patel et al. 2021; Steele et al. 2016).

The human gut microbiota, a complex ecosystem comprising trillions of microbial cells, plays an indispensable role in shaping our overall health and susceptibility to diseases (Shreiner, Kao, and Young 2015). This densely populated microbial environment is not only pivotal in the processes of digestion and nutrient absorption but also intimately connected to our immune system, determining its responses to various stimuli (Belkaid and Hand 2014). As the nexus between the external environment and our internal physiology, the gut microbiome is a critical determinant of the outcome of gastrointestinal infectious disease exposures, via a phenomenon termed 'colonization resistance' (Stecher et al. 2007; Winter et al. 2010; Lopez et al. 2016; Libertucci and Young 2019). This protective effect arises from multifaceted interactions: direct competition for nutrients, production of antimicrobial compounds, and modulation of the host's innate and adaptive immune responses (Leshem, Liwinski, and Elinav 2020). Some of the earliest work on colonisation resistance showed that suppressing the gut microbiome of mice with antibiotics dramatically reduced the dose of *Salmonella* required to establish infection (Bohnhoff, Drake, and Miller 1954). Recent work has made great strides in understanding mechanisms by which *Salmonella* and the microbiome interact (Rogers, Tsolis, and Bäumler 2021). Short chain fatty acids (SCFAs) are important in interaction between the microbiota and *Salmonella*, reducing the availability of oxygen in the gut (Byndloss et al. 2017) and acidifying the cytosol of *Salmonella*, inhibiting growth (Jacobson et al. 2018). Despite well-established knowledge about the gut microbiome's function in preventing *Salmonella* infections and the established faecal-oral transmission pathway of *S. Typhi*, the precise influence of the gut microbiome on the outcome of *S. Typhi* exposure remains underexplored, complicated by the host-specificity of *S. Typhi* which infects only humans.

While insights from animal studies of invasive infection with other *S. enterica* serovars can be informative, detailed studies of the interaction between the human gut microbiome and *S. Typhi* specifically are lacking. Controlled human infection model (CHIM) studies provide an experimental system in which to interrogate infections in humans, complementing observational studies of natural infections (Waddington et al. 2014; Jin et al. 2017). Data from a recent CHIM study (Zhang et al. (2018), revealed a potential association between typhoid fever susceptibility and the presence of *Methanobrevibacter* in the gut microbiome (Zhang et al. 2018). Analysing natural infections, Haak et al. (2020) determined that typhoid patients in Bangladesh had reduced microbial diversity and fewer SCFA producers than healthy counterparts (Haak et al. 2020). We have an incomplete understanding of the causal relationships between the gut microbiome and typhoid fever, better understanding of the relationship could lead to novel preventative mechanisms and diagnostics, as well as an improved understanding of colonisation resistance to serious invasive diseases in high burden settings.

To contribute to filling the knowledge gap in our understanding of the interaction between *S. Typhi* and the gut microbiome, we sequenced the stool microbiomes of 258 participants enrolled in relevant cohorts of the STRATAA study, conducted in three diverse high typhoid fever burden settings in Asia and Africa (Meiring et al. 2021). Signals that replicated in more than one study population were further investigated in a UK-based CHIM cohort.

# Materials & Methods

## Participants and sample collection

Detailed methods for the STRATAA study have been published previously (Darton et al. 2017; Meiring et al. 2021). In brief, approximately 100,000 individuals were enumerated in a demographic census in each of Blantyre in Malawi, Lalitpur in Nepal and Dhaka in Bangladesh. Febrile patients, of any age, within the study populations were recruited via passive surveillance, and “acute typhoid fever” patients were defined as those with positive blood cultures yielding *S. Typhi*. When participants presented with fever, stool samples were collected where possible, preferably prior to antimicrobial use. Stool specimens were transferred to -80°C within 6 hours of collection. Data on antimicrobial use prior to their enrolment was recorded (Darton et al. 2017). Blood-culture confirmed typhoid fever patients were then followed up and stool samples were collected from their household contacts; asymptomatic stool culture-negative individuals were included in microbiome sequencing. High Vi-titre individuals were identified from a community-based serological survey of up to 8,500 age-stratified participants per site from the original demographic census. From the serological survey, samples were analysed for anti-Vi IgG antibody (Meiring et al. 2021). The participants at each site with the highest Vi responses were followed up and stool sample collected (Khanam et al. 2021). Stool cultures were *S. Typhi*-negative in all but one participant (Khanam et al. 2021), however it is known that carriers shed only intermittently and high-Vi individuals may be considered potential carriers (Qureshi et al. 2024). For the microbiome substudy, we randomly selected for sequencing stool samples from up to 40 participants from each site, from each of three groups: acute typhoid fever cases, household contacts, and serosurvey participants with high-Vi titres.

Research ethics committee approval for a joint study protocol across all three surveillance sites was obtained within each country and from the Oxford Tropical Research Ethics Committee (University of Oxford, Oxford, UK).

## Sample processing and sequence analysis

Extraction of stool was done using the Fast-Prep 24 FastDNA Spin Kit (MP Biomedicals, CA, USA) according to manufacturer’s instructions. DNA was sent to the Wellcome Sanger Institute

(UK) for metagenomic sequencing using Illumina HiSeq 4000 to generate 150 bp paired end reads, yielding an average 14.8 million read pairs (standard deviation 2.3 million) per sample.

## Bioinformatics

Raw sequencing data was quality trimmed and adapters were removed using `bbduk v38.96` with the parameters ``ktrim=r k=23 mink=11 hdist=1 tbo tpe qtrim=r trimq=20 minlength=50``.

Sequence deriving from human DNA was removed by mapping to a human reference genome (GCF\_009914755.1) and the `hostile` tool (Constantinides, Hunt, and Crook 2023). Taxonomic profiling was carried out with `metaphlan v4.0.6` with database version `mpa_vOct22_CHOCOPHiAnSGB_202212`.

We used the BiG-MAP program (Victória Pascal Andreu et al. 2021)

(<https://github.com/medema-group/BiG-MAP>, commit e7b8042) to compare metagenomic readsets against a database of non-redundant metabolic gene clusters (MGCs) identified using `gutSMASH` (Victória Pascal Andreu et al. 2023) from a collection of reference genomes from the Culturable Genome Reference, the Human Microbiome Project and other Clostridia genomes (<https://zenodo.org/records/7252625#.ZFVTrexBz0r>). The species assigned to each MGC is the species from which the representative sequence representing the cluster was obtained. BiG-MAP calculated the number of reads per kilobase per million reads (RPKM) for each metabolic gene cluster.

A sub-sample of 8.8 million reads was taken from each readset using the ``sample`` command of the `seqtk` tool (v1.3-r106). Sub-sampled reads were then analysed with Resistance Gene Identifier (RGI) v6.0.2 `bwt` command against the CARD v3.2.7 reference database (Alcock et al. 2023). Due to uncertainty regarding some CARD database classifications (e.g. OXA-1 was classified as a carbapenemase), we used the drug class information for each gene from the NCBI AMR Reference Gene Database (`refgene`) v2023-08-08.2

(<https://www.ncbi.nlm.nih.gov/pathogens/refgene>). Only “Core” genes from NCBI `refgene` were analysed; these genes are almost entirely mobilisable AMR determinants and do not include mutational resistance. Extended-spectrum beta-lactamases (ESBLs) were identified based on the gene product descriptions in NCBI `refgene`. Only genes with an Average Percent Coverage of 100% in the RGI analysis were included in further analysis. The number of reads mapped to each gene (RGI Completely Mapped Reads) was normalised by the length of the gene (RGI

Reference Length) to generate a “Reads per kilobase of AMR gene” metric. There was no need to normalise for the number of reads, as all readsets had been sub-sampled to the same number of reads. RGI results were parsed and analysed using the scripts described in the Data Availability section of this manuscript. AMR genes identified in *S. Typhi* were obtained from (Argimón et al. 2021).

## Statistical analysis

Statistical analyses were done in R (v4.1.0). To quantify alpha diversity, Shannon’s index was calculated using the `alpha.div` function in the `rbiom` package (v1.0.3), and ANOVA analysis carried out with the `aov` function (stats package, v4.1.0). The Bray-Curtis metric of beta diversity was calculated with the `vegdist` function of the R package `vegan` (v2.6.4). Principal co-ordinates analysis (PCoA) was carried out with the `cmdscale` function (package stats, v4.1.0), and statistics comparing beta diversity between participant groups (i.e. acute typhoid, household contacts, presumptive carrier) was carried out using a PERMANOVA approach implemented by the `adonis2` function of the `vegan` package (v2.6.4). Associations between taxa and phenotypes of interest (e.g. participant group) were explored using multivariable linear modelling implemented in the `maaslin2` function of the `maaslin2` R package (v1.6.0). Depending on the analysis, co-variables such as age, sex, antibiotic exposure, and sequencing run were included in the analysis as stated. The same method was used to test for associations between taxonomic profiles or BiG-MAP metabolic gene clusters and patient group; for these analyses we included age, sex and antibiotic usage in the two weeks prior as co-variables. For `maaslin2` analyses, Benjamini-Hochberg correction was applied for multiple testing. In the endemic cohorts a q-value threshold of 0.05 was used to identify significant associations, while in the CHIM, due to small sample size, the default `maaslin2` q-value threshold of 0.2 was used.

For the grouping of species into “patterns” for the comparison of household contacts, typhoid fever patients, and high Vi-titre participants, a `maaslin2` analysis was carried out with all three participant groups. If there was no statistically significant difference for a species between two of the groups, that was classed as “same”; if there was a positive association (with the household contacts as the reference), that was classed as “down”; and if there was a negative association (again, with household contacts as reference) then that was classed as “up”. The combination of three options (same, up, down) in the two comparison groups (typhoid fever and high Vi-titre participants) gives a total of 9 “patterns” that could be observed.



## Controlled human infection model analysis

We used data from a *Salmonella* Typhi and Paratyphi A CHIM cohort to validate the associations identified in the endemic countries (Gibani et al. 2020). Briefly, healthy adults aged 18-60 were recruited to be challenged with either *S. Typhi* or *S. Paratyphi A*. The primary endpoint was diagnosis of typhoid or paratyphoid fever, defined as a temperature of  $\geq 38^{\circ}\text{C}$  persisting for  $\geq 12$  hours and/or *S. Typhi*/*Paratyphi A* bacteraemia in a sample collected  $\geq 72$  hours after oral challenge. Only data from participants who were being challenged for the first time were analysed here. Stool samples were taken from participants prior to challenge and stored at  $-80^{\circ}\text{C}$ . DNA and sequencing was undertaken using the methods described above for STRATAA samples. Associations between challenge outcome (typhoid/paratyphoid fever diagnosis) and taxonomic or MGC features were assessed using a linear model implemented in maaslin2, with participant sex, sequencing run, and age at challenge as covariates. Analyses were done separately for participants challenged with *S. Typhi*, *S. Paratyphi A*, and a combined analysis of both pathogens.

## Results

### Description of population

Stool microbiome sequences were successfully generated for 258 participants from Bangladesh (n = 80), Malawi (n = 102), and Nepal (n = 76). Across the three populations, there were three participant groups; 92 patients with acute typhoid fever, 97 healthy household contacts of acute typhoid cases, and 69 people with high anti-Vi titres. The baseline characteristics of participants are described in Table 1. Across all three sites, acute typhoid fever patients were significantly younger than household contacts, while in Bangladesh and Malawi high-Vi titre participants were significantly older than household contacts (Supplementary Figure 1, Table 1). Overall, in Malawi, Bangladesh, and Nepal, 62%, 53% and 54% of participants were female, respectively (Table 1, Supplementary Figure 2). In Bangladesh and Malawi, sex distribution was similar between the groups, whereas in Nepal, 82% of household contacts and 67% of carriers were female, while only 24% of cases were female (Table 1, Supplementary Figure 2). Of the acute typhoid fever cases, 37.5%, 73.9% and 44.8% from Bangladesh, Malawi, and Nepal, respectively, reported antimicrobial use in the 2 weeks prior to stool sample collection.

Table 1: Characteristics of participants in the microbiome sub-study of STRATAA surveillance

|                      |                                 | <b>Bangladesh</b> | <b>Malawi</b> | <b>Nepal</b> |
|----------------------|---------------------------------|-------------------|---------------|--------------|
| <b>Acute typhoid</b> | N                               | 40                | 23            | 29           |
|                      | Median age                      | 6                 | 9.7           | 17.2         |
|                      | Female (%)                      | 48%               | 61%           | 24%          |
|                      | Antibiotics in last 2 weeks (%) | 38%               | 74%           | 45%          |
| <b>Carrier</b>       | N                               | NA*               | 39            | 30           |
|                      | Median age                      | NA*               | 32            | 43.9         |
|                      | Female (%)                      | NA*               | 56%           | 67%          |
|                      | Antibiotics in last 2 weeks (%) | NA*               | NA†           | NA†          |
| <b>Control</b>       | N                               | 40                | 40            | 17           |
|                      | Median age                      | 28.5              | 24            | 35           |
|                      | Female (%)                      | 65%               | 65%           | 82%          |
|                      | Antibiotics in last 2 weeks (%) | NA†               | NA†           | NA†          |

\* Carriers from Bangladesh were not included in the analysis due to sample protocol differences

† Antibiotic usage in the two weeks previous was an exclusion criterion for carriers and household contacts.

## Acute typhoid fever patients compared with household contacts

First, we compared stool metagenomic profiles of acute typhoid patients with those of household contacts, within each of the three study populations, to explore microbiome signatures associated with typhoid fever. Participant group was not significantly associated with differences in alpha diversity in any population (Supplementary Figure 3, Supplementary Table 1). Beta diversity varied significantly between typhoid fever patients and household contacts across all sites (Figure 1, Supplementary Table 2). The proportion of beta diversity variance explained by participant group was highest in Malawi ( $R^2 = 0.25$ , FDR = 0.01), followed by Bangladesh ( $R^2 = 0.07$ , FDR = 0.01), Nepal ( $R^2 = 0.06$ , FDR = 0.01) and the combined analysis

( $R^2 = 0.04$ , FDR = 0.01) (Figure 1, Supplementary Table 2, Supplementary Table 3, Supplementary Table 4, Supplementary Table 5). Participant group explained the greatest beta diversity variance of the factors investigated (which also included sex, age, and reported antibiotic use) in a combined analysis of all three sites and for each site individually. In Malawi, prior antibiotic usage, and the interaction of prior antibiotic usage with age and sex, were also significantly associated with beta diversity, although these variables explained a lower proportion of variance than participant group ( $R^2$  0.02-0.05, Supplementary Table 4). In Nepal, sex was significantly associated with beta diversity and explained almost as much variance as participant group ( $R^2 = 0.04$ , Supplementary Table 5), which was itself associated with sex in this site. Firmicutes was the dominant phylum in typhoid fever patients and household contacts at all three sites, followed by Bacteroidetes in Malawi and Nepal and Actinobacteria in Bangladesh (Supplementary Figure 4, Supplementary Table 6).

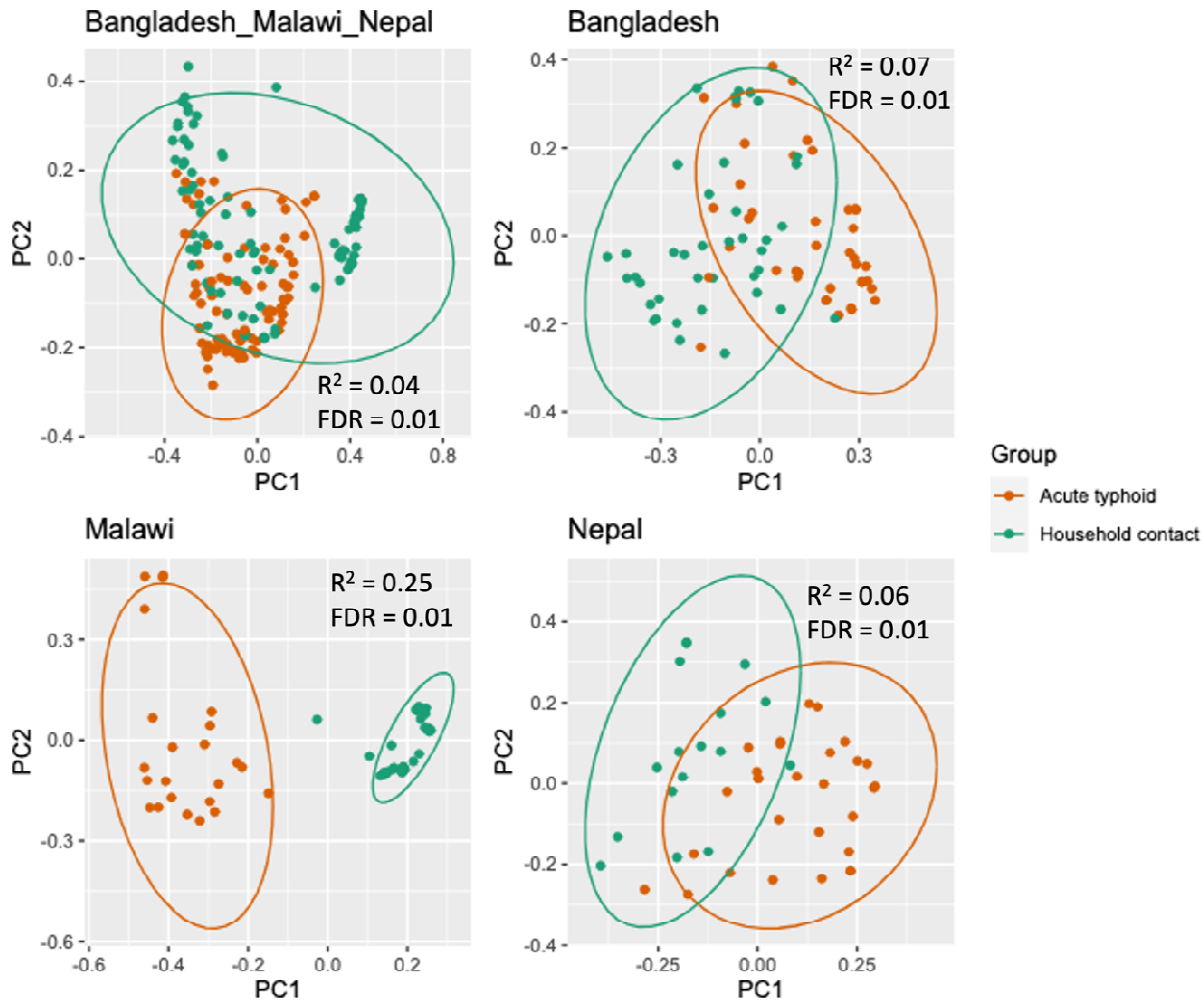

Figure 1: Principal co-ordinate analysis of the beta diversity between household contacts and typhoid fever participants across all three sites, and for each site individually. The proportion of variance explained ( $R^2$ ) and the Bonferroni corrected FDR from a PERMANOVA analysis including participant group, sex, and antibiotic usage are displayed on each plot. In the combined analysis, country of sampling was also included in the PERMANOVA analysis.

maaslin2 analysis of taxonomic profiles identified 92, 23 and 0 species significantly associated with household contact vs typhoid fever participant groups in Malawi, Bangladesh, and Nepal, respectively (Supplementary Table 7, Supplementary Table 8). No taxa showed significant associations across all three sites; however, four showed consistent associations at two sites (Bangladesh and Malawi), all of which were negatively associated with typhoid fever (Figure 2). These four species were *Prevotella copri* clade A, *Haemophilus parainfluenzae*, *Clostridium* SGB6179 and a *Veillonellaceae* spp represented by a metagenome assembled genome, GGB4266\_SGB5809. Although there were differences in age between cases and household contacts at all sites, the taxonomic associations were adjusted for age using maaslin2, and the

associations with typhoid status was also evident within age groups (Supplementary Figures 5-8). Of these four taxa, none were significantly associated with typhoid fever in Nepal.

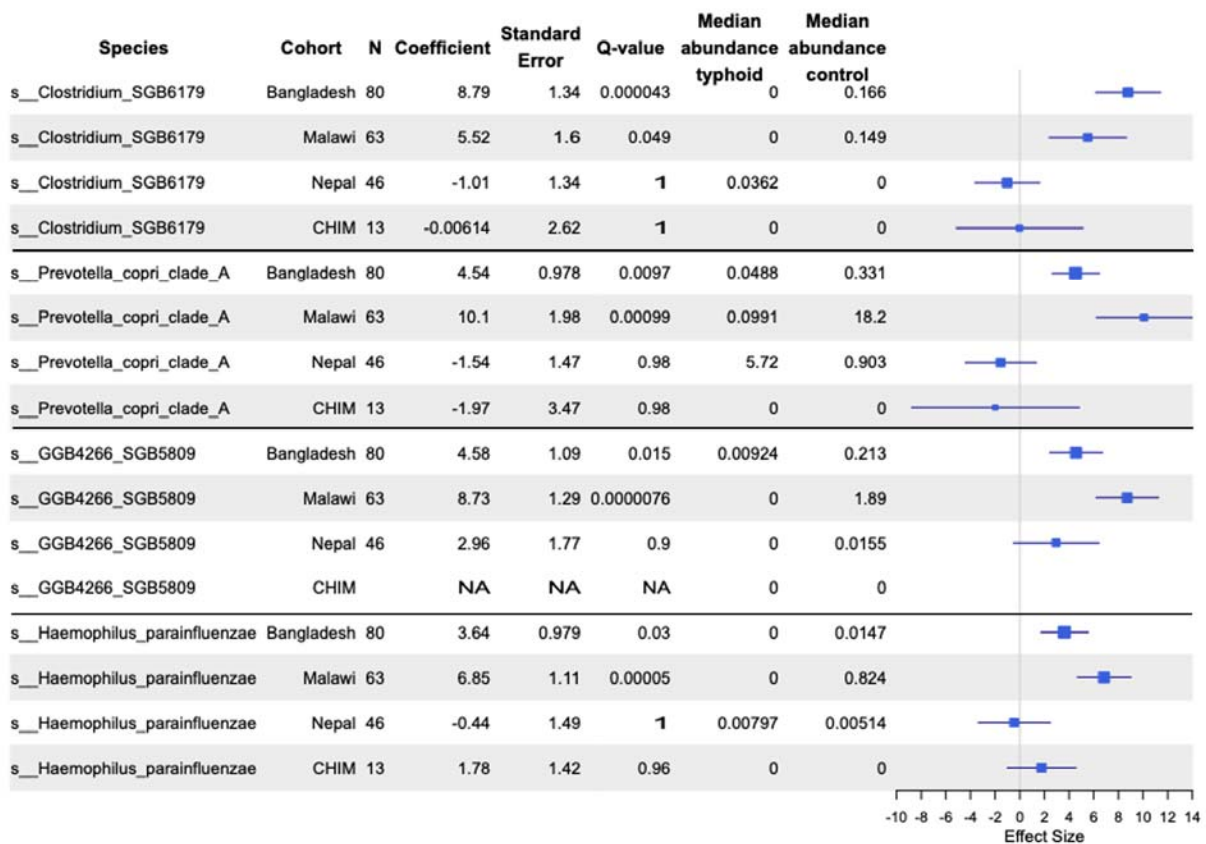

Figure 2: Forest plot of species associated with healthy household contacts vs typhoid fever participants in at least two endemic countries, also showing results from Nepal and the CHIM cohort, where there was no significant association. Taxa are labelled with their GTDB identifier, note that 's\_\_GGB4266\_SGB5809' refers to a proposed novel species of Veillonellaceae.

Additional taxa were associated with typhoid fever at only one site. In Bangladesh, *Prevotella copri* clade C and *Romboutsia timonensis* and X were negatively associated with typhoid fever, while X taxa including seven species of Actinomyces were positively associated with typhoid fever (Supplementary Table 7). In Malawi, 70 species were negatively associated with typhoid fever, including *Ruminococcus gnavus*, *Roseburia intestinalis*, *Roseburia inulinivorans*, and *Faecalibacterium prausnitzii* (Supplementary Table 8). A further 18 species were positively associated with typhoid fever in Malawi, including 11 (61%) that are only in the Metaphlan4 database as MAGs (Supplementary Table 8).

Using BiG-MAP to identify metabolic gene clusters (MGCs), and maaslin2 to model associations with participant group, we identified 264 MGCs that were significantly associated with typhoid

fever patients vs household contacts in the Malawi cohort, 126 in Bangladesh, and 2 in Nepal (Supplementary Table 24, Supplementary Table 25, Supplementary Table 26). Neither of the MGC associations identified in the Nepal data were replicated in the Malawi or Bangladesh cohorts. There were 28 MGCs significantly associated with typhoid fever in both Bangladesh and Malawi (summarised in Table 2, full information in Supplementary Table 9), all were negatively associated with typhoid fever in both settings. Six of these MGCs were linked to SCFA metabolism ('pyruvate2acetate.formate') and five to anaerobic metabolism ('Rnf complex'), associated with *Prevotella* and *Haemophilus* (see Figure 2, Table 2, Supplementary Table 9). None of these 28 MGCs showed negative associations with acute typhoid fever in Nepal.

We hypothesised the taxa and MGCs that were found in higher abundance in asymptomatic household contacts of typhoid fever patients may be protective against developing disease upon exposure to *S. Typhi*. We sought to explore this more directly by assessing their abundance in CHIM participants who did or did not develop enteric fever upon challenge with typhoidal *Salmonella*, in a UK-based study (Gibani et al. 2020). We sequenced the microbiomes of 13 participants who were subsequently challenged with *S. Typhi* and 13 with *S. Paratyphi A*, of which 7 and 6 were diagnosed with enteric (typhoid or paratyphoid) fever, respectively (Supplementary Table 18). There was no significant difference (FDR < 0.05) in alpha or beta diversity among CHIM participants by age at challenge, sex, or enteric fever diagnosis (Supplementary Table 19, Supplementary Table 20, Supplementary Figure 15). In a linear model analysis including only the 28 MGC classes that were identified as negatively associated with typhoid in both Malawi and Bangladesh, two were also negatively associated with typhoid fever diagnosis in CHIM participants: an "Rnf\_complex.Glycine\_cleavage.succinate2propionate" MGC (coefficient = -3.4, q-value = 0.22) and an "Rnf\_complex" MGC (coefficient = -6.2, q-value = 0.22) (Figure 2, Supplementary Figure 16, full results available in Supplementary Table 23). None of the 28 MGCs tested were associated with paratyphoid fever or a combination of both typhoid and paratyphoid fever. We investigated whether any of the species associated with typhoid in both Malawi and Bangladesh were associated with susceptibility to typhoid and/or paratyphoid fever in the CHIM cohort; none of them were (see Figure 2).

Table 2: Summary of the MGCs negatively associated with typhoid fever in both Bangladesh and Malawi, and the species of each MGC reference sequence. Full information in Supplementary Table 9.

| MGC_class                                 | n | Species                                                                                                                       |
|-------------------------------------------|---|-------------------------------------------------------------------------------------------------------------------------------|
| Pyruvate2acetate.formate                  | 6 | Haemophilus aegyptius, Haemophilus haemolyticus, Haemophilus parainfluenzae, Prevotella copri, Prevotella sp., Prevotella sp. |
| Rnf_complex                               | 5 | Haemophilus parainfluenzae, Prevotella copri, Prevotella sp., Prevotella sp., Prevotella sp.                                  |
| TPP_AA_metabolism                         | 4 | Clostridium celatum, Haemophilus pittmaniae, Haemophilus sputorum, Prevotella sp.                                             |
| Respiratory_glycerol                      | 2 | Aggregatibacter sp., Haemophilus parainfluenzae                                                                               |
| Arginine2putrescine.Putrescine2spermidine | 1 | Romboutsia sp.                                                                                                                |
| Formate_dehydrogenase                     | 1 | Haemophilus sp.                                                                                                               |
| Fumarate2succinate                        | 1 | Haemophilus sp.                                                                                                               |
| OD_eut_pdu_related.PFOR_II_pathway        | 1 | Paeniclostridium sordellii                                                                                                    |
| OD_fatty_acids                            | 1 | Dialister succinatiphilus                                                                                                     |
| Others_HGD_unassigned                     | 1 | Prevotella copri                                                                                                              |
| PFOR_II_pathway                           | 1 | Prevotella sp.                                                                                                                |
| TPP_AA_metabolism.Arginine2putrescine     | 1 | Haemophilus sp.                                                                                                               |
| TPP_fatty_acids                           | 1 | Prevotella copri                                                                                                              |
| porA                                      | 1 | Prevotella copri                                                                                                              |
| succinate2propionate                      | 1 | Dialister invisus                                                                                                             |

## Analysis of high-Vi participants

High-Vi participants may represent asymptomatic gall-bladder carriers, or individuals with recent undiagnosed typhoid fever, either of whom may be a source in transmission. Detection of carriers is important for typhoid fever control, and will remain so even as disease incidence reduces due to vaccination and improvements in WASH, therefore we sought to explore the microbiome signature of this group. Samples from Bangladesh were not included in this analysis, as laboratory processing of the high Vi-titre participant samples from Bangladesh was not consistent with the other sites or participant groups. Using PERMANOVA, participant group was significantly associated with beta diversity in both countries (age and sex were not significant). Participant group explained greater variance in the Malawi cohort ( $R^2$  0.25,



FDR=0.01) than Nepal ( $R^2$  0.07, FDR=0.01, Supplementary Table 11, Supplementary Table 12,

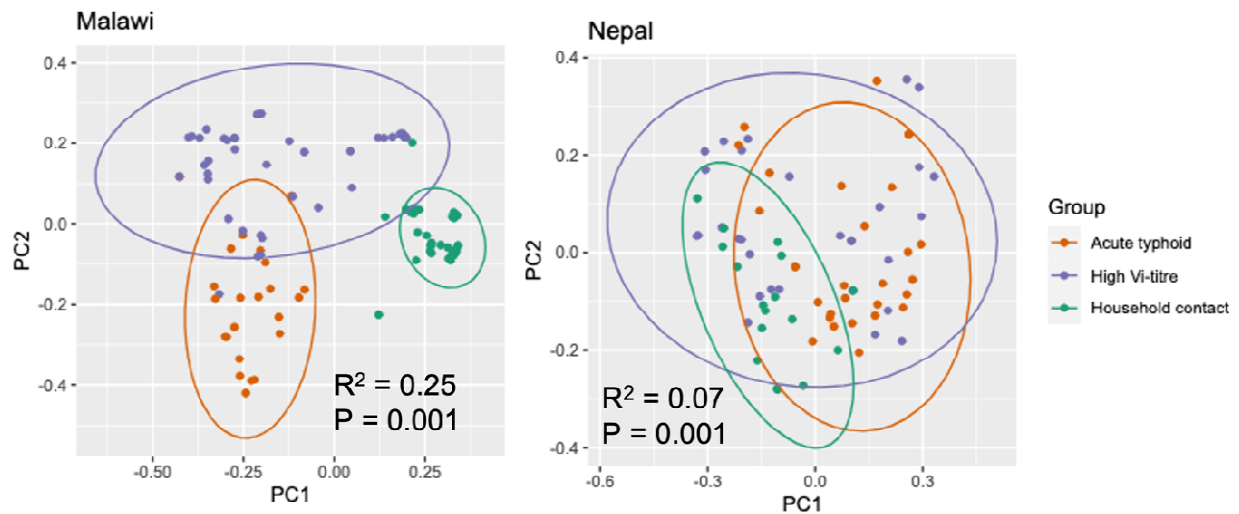

Supplementary Figure 10). Figure 3 shows the relative abundance of species that were significantly associated with high-Vi individuals and/or typhoid fever patients vs household contacts. The three participant groups have distinct signatures, with high-Vi individuals closer to typhoid patients than to household contacts (Figure 3). In the Malawi cohort, 125 bacterial species were significantly associated with household contacts vs high Vi-titre individuals (Supplementary Table 13), and 41 of these were also significantly associated with household contacts vs typhoid fever (Supplementary Table 21). These 41 species include *H. parainfluenzae*, *Blautia obeum*, and *Ruminococcus gnavus* (all less prevalent in acute typhoid than household contacts and high-Vi individuals). Amongst Nepal samples, only one species significantly differed between household controls and high-Vi individuals (the Firmicutes SGB GGB9790 SGB15413). There were no species associated with household contacts compared with typhoid patients from Nepal, and SGB15413 did not differ between these groups (Supplementary Figure 11).

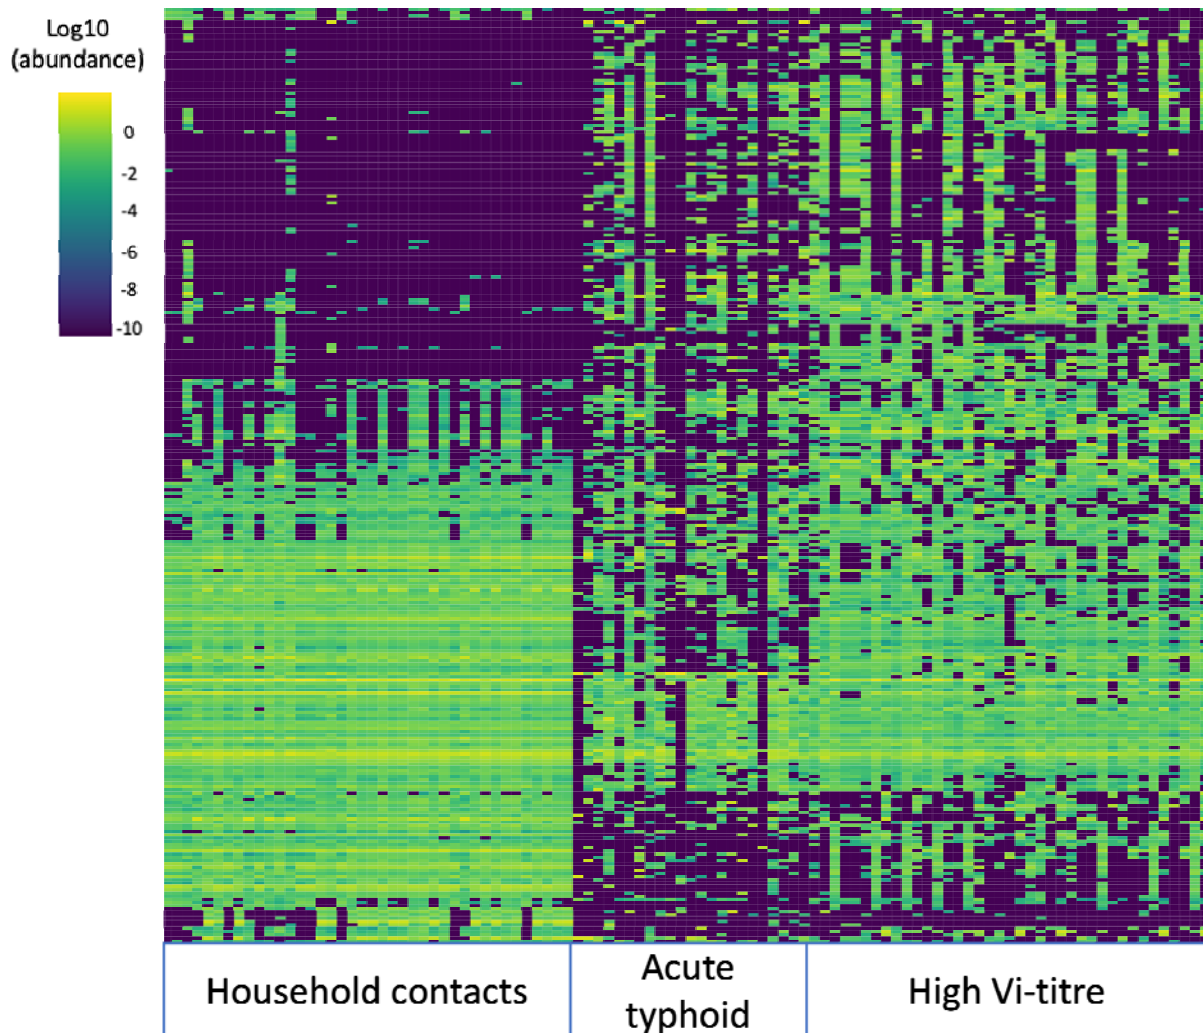

Figure 3: Heatmap of bacteria species abundance in household contacts, acute typhoid fever cases and high Vi-titre participants from Blantyre, Malawi

The combined relative abundance of species only described as species genome bins (SGBs) was significantly lower in household contacts in Malawi (13.9%), compared with both typhoid fever patients (34.8%,  $P=0.012$ ) and high Vi-titre participants (47.1%,  $P=2.2 \times 10^{-16}$ ) in this setting (Supplementary Figure 13). The 50 SGBs with the highest summed abundance across all participant types in Malawi belonged to Firmicutes ( $n = 41$ ), Actinobacteria ( $n = 4$ ), Bacteroidetes ( $n = 3$ ), and Proteobacteria ( $n = 2$ ) (Supplementary Table 22). The most common families of the 50 most abundant SGBs were Oscillospiraceae ( $n = 13$ ), Lachnospiraceae ( $n = 7$ ), and Clostridiaceae ( $n = 4$ ) (Supplementary Table 22). In Nepal, high Vi-titre individuals had lower SGB relative abundance than acute typhoid cases (16.8% vs 29.9%,  $p = 0.03$ , Supplementary Figure 12).

## AMR genes

We recently reported AMR genotypes and phenotypes for *S. Typhi* isolated from acute typhoid fever cases in STRATAA (Dyson et al. 2024). Quinolone resistance was common in Bangladesh and Nepal but very rare in Malawi; here we saw a similar pattern reflected in the gut microbiomes, with 2% quinolone resistance in Malawi, 30% in Bangladesh and 15% in Nepal (Supplementary Table 14). Macrolide resistance was identified in one *S. Typhi* isolate from Bangladesh (0.6%) but not in Nepal or Malawi, here we found higher rates of macrolide resistance in microbiomes from individuals in Bangladesh (38%) and Nepal (35%) and lower in Malawi (11%). For the older drugs, *S. Typhi* isolates from Malawi had near-universal resistance to older sulfonamides and tetracyclines, and this was mirrored in high rates of resistance to these drugs in the microbiome samples (92% sulfonamides, 52% tetracycline). ESBLs were not detected in any *S. Typhi* isolates but were common in the microbiomes in Nepal (17%) and Bangladesh (9%); less so in Malawi (3%).

The proportion of samples with macrolide and trimethoprim resistance genes that have been observed in *S. Typhi* was significantly higher in participants with acute typhoid fever than in household contacts or high Vi-titre participants (macrolides = 42%, 14%, 22% respectively, Chi-square test p-value =  $4.4 \times 10^{-5}$ ; trimethoprim = 32%, 12%, 20% respectively, Chi-square test p-value = 0.005). There was no significant difference between participant types in the proportion of samples with resistance genes to any other drug classes. There was no statistically significant association between prior reported antibiotic usage and the number of AMR genes (Wilcoxon-rank sum P-value = 0.52) or the number of AMR gene classes (Wilcoxon Rank Sum P-value = 0.56) in typhoid fever patients across all sites (Supplementary Figure 14).

## Discussion

In this study, we examined the relationships between stool microbiome composition and typhoid fever in three settings with endemic disease. Our analyses identified four microbial species (Figure 2), linked to anaerobic fermentation and SCFA metabolism (Table 2), that differentiated typhoid fever patients from household contacts in Bangladesh and Malawi. While these taxa were not found in the UK-based CHIM participants, a different MGC with a potential link to SCFA metabolism was associated with non-susceptibility to typhoid fever, supporting a protective role for SCFA-producers.

The strengths of our study include a larger sample size than previous investigations of the interaction between typhoid fever and the microbiome, and a multi-site study design to increase generalisability. In contrast to previous studies of the microbiome and typhoid fever, we used shotgun metagenomics to characterise the gut flora, enabling in depth functional analysis and investigation of AMR genes. Notably, using the same methodology to analyse participants from different countries, we identified distinct associated taxa in the different locations. This suggests that differences in the microbiomes of different human populations can impact their susceptibility to disease, and could also hamper the generalisability of study findings between populations. It is notable that the most consistent microbial signature for disease susceptibility, identified across multiple study populations with small sample sizes, was a functional signature (specifically gene clusters associated with SCFA metabolism) rather than any specific taxa that perform this function.

One of the key limitations of our study is the lack of age and sex matching between the typhoid fever and household contact groups. The age and sex composition of the household controls reflects the occupants of the household during the daytime visits of the study workers. This discrepancy may introduce bias, as age and sex are known to influence the composition and function of the microbiome (Yatsunen et al. 2012). Although these variables were included in the statistical analyses, the lack of matching weakens our findings. Our use of a case-control study design in the endemic countries generated numerous hypotheses for subsequent research, but it does not prove causal relationships. Additionally, we did not collect dietary information from participants. Diet is a major determinant of microbiome composition and function, and variations in dietary habits could confound the associations we observed (Bourdeau-Julien et al. 2023). Lastly, accounting for the effect of antibiotics on the microbiome

in these cohorts presents a complex challenge, as it can significantly alter microbiome composition and potentially mask or mimic associations with typhoid fever. These challenges could largely be addressed using CHIM studies. Unfortunately, the only available CHIM data was from a very different study population (in the UK) and with very small sample size (n=13 exposed to *S. Typhi*). While the UK-based CHIM has been invaluable in demonstrating vaccine efficacy and providing insights into fundamental infection biology for *S. Typhi*, development of CHIMs in study populations with endemic disease would be helpful to better elucidate specific microbial signatures of protection.

Our use of shotgun metagenomics enabled us to also investigate the prevalence of AMR genes associated with resistance in *S. Typhi* across the three sites and participant groups. Macrolide and trimethoprim resistance genes were more common in acute typhoid cases compared with the household controls and high Vi-titre participants, highlighting that typhoid and associated antimicrobial usage imposes a selective pressure on the gut microbiome. This supports the idea that reducing disease via immunisation could reduce AMR beyond just *S. Typhi*. Higher levels of resistance to sulphonamides in Malawi likely reflects the common use of trimethoprim-sulfamethoxazole in HIV/AIDS programs (MacPherson et al. 2022), while higher microbiome prevalence of acquired ESBL and fluoroquinolone-resistance genes in Bangladesh than Malawi reflects the local epidemiology (e.g. recent studies of blood stream infections show that in Bangladesh, 72% and 75% were resistant to ciprofloxacin and third-generation cephalosporins respectively, compared with 31% and 30% in Malawi) (Musicha et al. 2017; Ahmed et al. 2017). The gut microbiome prevalence of resistance genes followed a similar pattern to the prevalence of resistance genes in *S. Typhi* observed from these sites (Dyson et al. 2024) for tetracycline, sulphonamides and quinolones, which likely reflects a shared evolutionary pressure of the isolates and the microbiome. The fact that non-ESBL beta-lactamases were identified in fewer metagenomes than ESBL beta-lactamases is due to our focus on only beta-lactamases that have been identified as associated with resistance in *S. Typhi*.

Zhang et al. investigated 16S community profile and metatranscriptome features associated with susceptibility to typhoid fever in a CHIM (Zhang et al. 2018). One of their primary findings was that the archaeal genus *Methanobrevibacter* was enriched in people who were challenged with *S. Typhi* but did not develop disease. In contrast, we only identified one association with a *Methanobrevibacter* species (*M. smithii*); a positive association with typhoid fever in Malawi only. Furthermore, Zhang et al., identified that *Prevotella* was higher in people who developed

typhoid fever, in contrast to our findings that it was negatively associated with typhoid fever in natural infections in endemic settings. One source of these discrepancies could be that Zhang et al. employed 16S, while we used shotgun metagenomics. Haak et al. observed more SCFA producing bacteria, and higher fecal load of SCFAs, in both healthy control and febrile but non-typhoid fever participants in their study in Bangladesh compared with typhoid fever patients, which corresponds well with our findings (Haak et al. 2020). It has also been shown that higher SCFAs in an acidic environment, and a strict anaerobic environment, can inhibit the growth of Enterobacteriaceae such as *Salmonella* via both direct and indirect mechanisms (Rogers, Tsohis, and Bäumler 2021).

Our findings from the STRATAA cohorts can be interpreted from two perspectives: i) the microbiota protecting against typhoid and, ii) typhoid causing microbiota changes. In contrast, the CHIM study design enables us to specifically assess whether microbiota present prior to pathogen exposure are associated with the outcome of that exposure (i.e. developing disease or not). Unfortunately, none of the taxa negatively associated with typhoid fever in the endemic settings were present in the CHIM participants, making it impossible to validate the association. It is well established that microbiome species composition differs between human populations, and particularly between those in high-income countries and low-and-middle-income countries (Gupta, Paul, and Dutta 2017). However, the metabolic gene cluster findings identified a recurring finding across the endemic settings and the CHIM; an association between species encoding SCFA metabolising genes and non-susceptibility to typhoid fever. This finding is consistent with previous clinical studies (Haak et al. 2020), and also mouse model work showing that SCFAs such as propionate can prevent *Salmonella* colonisation (Chen et al. 2017; Jacobson et al. 2018). While it should be noted that the CHIM sample size was very small, the fact that we identified a statistically significant difference supports the idea that the effect is quite strong. (While our CHIM analyses lacked power, which is reflected in the high q-values obtained, these are nonetheless below the default maaslin2 threshold for significant findings.)

Both *P. copri* and *H. parainfluenzae*, which were significantly lower in typhoid fever patients compared with household contacts in both Bangladesh and Malawi, are associated with increased gut inflammation (Sohn et al. 2023; Larsen 2017). *P. copri* is thought to increase Th17 inflammation (Godinez et al. 2011) while *H. parainfluenzae* stimulates intestinal (IFN- $\gamma$ )+ CD4+ T cells (Sohn et al. 2023), two mechanisms which play a key role in the response to *Salmonella* infections (Bao et al. 2000; Raffatellu et al. 2008). Increased inflammation could

prime the host to respond more rapidly to pathogenic exposures, leading to enhanced control of infections. It is highly plausible that the gut microbiome plays a role in shaping the response of the immune system to pathogen challenge (Durack and Lynch 2019). This intriguing association needs further investigation, as the role of inflammation in enabling *Salmonella* to overcome colonisation resistance in mice is well established (Winter et al. 2010; Rogers, Tsolis, and Bäumler 2021). There were more species significantly negatively associated with typhoid fever in Malawi than Bangladesh. Among these was *Ruminococcus gnavus*, which has multiple described phenotypes that could influence susceptibility to enteric infection, including IgA stimulation (Bunker et al. 2019), protection against enteropathogenic *E. coli* (McGrath et al. 2022), stimulating host tryptophan catabolism (Hoffmann et al. 2016) (*S. Typhi* requires tryptophan to grow in macrophages (Blohmke et al. 2016)), and production of secondary bile acids including chenodeoxycholic acid and iso-LCA that have anti-virulence effects on *Salmonella* (Lee et al. 2013; Yang, Stein, and Hang 2023).

It is plausible that the microbiome is modified in people suffering from typhoid fever. Colorectal cancer patients from Morocco and Kenya had reduced *P. copri* in their gut, indicating that *P. copri* may decrease due to gut disruption (Allali et al. 2018; Obuya et al. 2022). Potential triggers for microbiome alterations due to typhoid fever include antibiotic use, dietary shifts or anorexia due to sickness, *S. Typhi*-induced malabsorption in the small intestine leading to nutrient changes downstream in the large intestine, and the direct impact of fever on microbiome composition (Chuttani, Jain, and Misra 1971; Huus and Ley 2021).

We cannot be certain about the exact cause of the high Vi titre in the high Vi-titre participants. Potential causes include recent asymptomatic *S. Typhi* exposure/infection, exposure/infection with *Citrobacter freundii* which can be Vi-antigen positive, or chronic *S. Typhi* carriage. A recent study in Pakistan reported a strong correlation between high Vi and chronic carriage of *S. Typhi* confirmed by gallbladder culture, supporting the interpretation of high-Vi individuals as potential carriers (Qureshi et al. 2024). It is striking that there was a clear divergence in microbiota profile between these participants and acute cases and household contacts in Malawi, as this suggests that there is an interaction between the cause of the high Vi-titre and the gut microbiota. The 41 species that were significantly lower in both typhoid fever cases and high Vi-titre participants included the potentially immune-modulatory *H. parainfluenzae* (Sohn et al. 2023), the bile acid modifying *Blautia obeum* (formerly *Ruminococcus obeum*), and *Ruminococcus gnavus*. Notably, it has been demonstrated that bile salt hydrolases encoded by *B. obeum* can inhibit *Vibrio*

*cholerae* virulence gene activation and colonization (Alavi et al. 2020), and it is intriguing to hypothesise a similar mechanism might protect against *S. Typhi* gallbladder carriage and/or systemic infection. The influence of these species on susceptibility to *S. Typhi* infection, gallbladder carriage, and immune-reactivity should be investigated further.

## Conclusions

In this study, typhoid fever patients in Malawi and Bangladesh displayed distinct microbiome signatures compared to household contacts, marked by lower abundance of SCFA producers and inflammation-related species. The negative association between SCFA producing genes and typhoid fever susceptibility was also replicated to some extent in our UK-based challenge study, although differences in species composition in the microbiota of these host populations make direct replication challenging, and highlights the importance of establishing challenge studies in host populations where the disease of interest is endemic. Species such as *P. copri* and *H. parainfluenzae*, negatively associated with typhoid in Bangladesh and Malawi, have been described as causing types of inflammation that are known to be important in the control of invasive Salmonellosis, and warrant functional investigation in the context of typhoid fever susceptibility.



## Data availability

- [https://github.com/flashton2003/STRATAA\\_metagenomics](https://github.com/flashton2003/STRATAA_metagenomics)

## Acknowledgements

We thank all the STRATAA participants for their willingness to take part in this research. We also acknowledge the sequencing and pathogen informatics teams at the Wellcome Sanger Institute for sequencing and data processing, and Zoe Dyson for assisting with sequence data transfer. We would like to acknowledge Ndaru Jambo, Andreas Bäumlér, and Renee Tsohis for helpful discussions. KA, SK, NRT, OS were funded by the Wellcome Trust (220540/Z/20/A). For the purpose of open access, the authors have applied a CC-BY public copyright licence to any author-accepted manuscript version arising from this submission. This research was funded by the Wellcome Trust (STRATAA grant number 106158/Z/14/Z, and core funding to the Wellcome Sanger Institute, grant number 206194) and the Bill & Melinda Gates Foundation (grant number OPP1141321). MAG, ACC, and PMA were supported by a research professorship (NIHR300039) from the National Institute for Health and Care Research, UK Department of Health and Social Care.

Members of the STRATAA study group are Christoph Blohmke, Yama Farooq, Jennifer Hill, Nhu Tran Hoang, Tikhala Makhaza Jere, Harrison Msuku, Tran Vu Thieu Nga, Rose Nkhata, Sadia Isfat Ara Rahman, Nazia Rahman, Neil J Saad, Trinh Van Tan, Deus Thindwa, Merryn Voysey, and Richard Wachepa. Their affiliations are: Malawi-Liverpool-Wellcome Programme, Blantyre, Malawi (Tikhala Makhaza Jere, Harrison Msuku, Rose Nkhata, Deus Thindwa, Richard Wachepa); International Centre for Diarrhoeal Disease Research, Dhaka, Bangladesh (Sadia Isfat Ara Rahman, Nazia Rahman); Oxford Vaccine Group, Department of Paediatrics, University of Oxford, and the NIHR Oxford Biomedical Research Centre, Oxford, UK (Christoph Blohmke, Yama Farooq, Jennifer Hill, Merryn Voysey); The Hospital for Tropical Diseases, Wellcome Trust Major Overseas Programme, Oxford University Clinical Research Unit, Ho Chi Minh City, Viet Nam (Nhu Tran Hoang, Tran Vu Thieu Nga, Trinh Van Tan); Department of Epidemiology of Microbial Diseases and the Public Health Modeling Unit, Yale School of Public Health, Yale University, New Haven, CT, USA (Neil J Saad)

## Author contributions

Philip M. Ashton – conceptualisation, data curation, formal analysis, investigation, methodology, resources, software, visualisation, writing – original draft preparation.

Leonardos Mageiros - conceptualisation, data curation, formal analysis, investigation, methodology, software, writing – review and editing.

James Meiring - data curation, investigation, methodology, writing – review and editing.

Angeziwa Chunga Chirambo – data curation, investigation, writing – review and editing.

Farhana Khanam – data curation, investigation, writing – review and editing.

Happy Banda – investigation, writing – review and editing.

Abhilasha Karkey – investigation, supervision, writing – review and editing.

Sabina Dongol – data curation, investigation, writing – review and editing.

Lorena Preciado Llanes – conceptualisation, data curation, investigation, methodology, writing – review and editing.

Helena Thomaidis-Brears - investigation, methodology, writing – review and editing.

Malick Gibani – data curation, investigation, methodology, writing – review and editing.

Nazmul Hasan Rajib – investigation, writing – review and editing.

Nazia Rahman – investigation, writing – review and editing.

Prasanta Kumar Biswas – investigation, writing – review and editing.

Md Amirul Islam Bhuiyan – investigation, writing – review and editing.

Andrew Pollard – conceptualisation, funding acquisition, supervision, writing – review and editing.

Stephen Baker – funding acquisition, writing – review and editing.

Buddha Basnyat – funding acquisition, supervision, resources, writing – review and editing.

John D Clemens – funding acquisition, supervision, writing – review and editing.

Christiane Dolecek – funding acquisition, writing – review and editing.

Sarah J Dunstan – funding acquisition, writing – review and editing.

Gordon Dougan – conceptualisation, funding acquisition, methods, resources, writing – review and editing.

Robert S. Heyderman – funding acquisition, writing – review and editing.

Virginia E. Pitzer – funding acquisition, writing – review and editing.

Firdausi Qadri – funding acquisition, supervision, resources, writing – review and editing.

Melita A. Gordon – conceptualisation, funding acquisition, resources, supervision, writing – review and editing.

Thomas C. Darton – conceptualisation, methodology, writing – review and editing.

Kathryn E. Holt – conceptualisation, funding acquisition, resources, methodology, supervision, writing – original draft preparation, writing – review and editing.

## References

- Ahmed, Dilruba, Md Ausrafuggaman Nahid, Abdullah Bashar Sami, Farhana Halim, Nasrin Akter, Tuhin Sadique, Md Sohel Rana, Md Shahriar Bin Elahi, and Md Mahbubur Rahman. 2017. 'Bacterial Etiology of Bloodstream Infections and Antimicrobial Resistance in Dhaka, Bangladesh, 2005–2014'. *Antimicrobial Resistance & Infection Control* 6 (1): 2. <https://doi.org/10.1186/s13756-016-0162-z>.
- Alavi, Salma, Jonathan D. Mitchell, Jennifer Y. Cho, Rui Liu, John C. Macbeth, and Ansel Hsiao. 2020. 'Interpersonal Gut Microbiome Variation Drives Susceptibility and Resistance to Cholera Infection'. *Cell* 181 (7): 1533-1546.e13. <https://doi.org/10.1016/j.cell.2020.05.036>.
- Alcock, Brian P., William Huynh, Romeo Chalil, Keaton W. Smith, Amogelang R. Raphenya, Mateusz A. Wlodarski, Arman Edalatmand, et al. 2023. 'CARD 2023: Expanded Curation, Support for Machine Learning, and Resistome Prediction at the Comprehensive Antibiotic Resistance Database'. *Nucleic Acids Research* 51 (D1): D690–99. <https://doi.org/10.1093/nar/gkac920>.
- Allali, Imane, Noureddine Boukhatem, Leila Bouguenouch, Hanaa Hardi, H. Abir Boudouaya, M. Belen Cadenas, Karim Ouldin, Saaïd Amzazi, M. Andrea Azcarate-Peril, and Hassan Ghazal. 2018. 'Gut Microbiome of Moroccan Colorectal Cancer Patients'. *Medical Microbiology and Immunology* 207 (3): 211–25. <https://doi.org/10.1007/s00430-018-0542-5>.
- Argimón, Silvia, Corin A. Yeats, Richard J. Goater, Khalil Abudahab, Benjamin Taylor, Anthony Underwood, Leonor Sánchez-Busó, et al. 2021. 'A Global Resource for Genomic Predictions of Antimicrobial Resistance and Surveillance of Salmonella Typhi at Pathogenwatch'. *Nature Communications* 12 (1): 2879. <https://doi.org/10.1038/s41467-021-23091-2>.
- Bao, S, K W Beagley, M P France, J Shen, and A J Husband. 2000. 'Interferon- $\gamma$  Plays a Critical Role in Intestinal Immunity against Salmonella Typhimurium Infection'. *Immunology* 99 (3): 464–72. <https://doi.org/10.1046/j.1365-2567.2000.00955.x>.
- Belkaid, Yasmine, and Timothy Hand. 2014. 'Role of the Microbiota in Immunity and Inflammation'. *Cell* 157 (1): 121–41. <https://doi.org/10.1016/j.cell.2014.03.011>.
- Blohmke, Christoph J., Thomas C. Darton, Claire Jones, Nicolas M. Suarez, Claire S. Waddington, Brian Angus, Liqing Zhou, et al. 2016. 'Interferon-Driven Alterations of the Host's Amino Acid Metabolism in the Pathogenesis of Typhoid Fever'. *Journal of Experimental Medicine* 213 (6): 1061–77. <https://doi.org/10.1084/jem.20151025>.
- Bohnhoff, Marjorie, Barbara L. Drake, and C. Phillip Miller. 1954. 'Effect of Streptomycin on Susceptibility of Intestinal Tract to Experimental Salmonella Infection.' *Proceedings of the Society for Experimental Biology and Medicine* 86 (1): 132–37. <https://doi.org/10.3181/00379727-86-21030>.

- Bourdeau-Julien, Isabelle, Sophie Castonguay-Paradis, Gabrielle Rochefort, Julie Perron, Benoît Lamarche, Nicolas Flamand, Vincenzo Di Marzo, Alain Veilleux, and Frédéric Raymond. 2023. 'The Diet Rapidly and Differentially Affects the Gut Microbiota and Host Lipid Mediators in a Healthy Population'. *Microbiome* 11 (1): 26. <https://doi.org/10.1186/s40168-023-01469-2>.
- Bunker, Jeffrey J., Christoph Drees, Andrea R. Watson, Catherine H. Plunkett, Cathryn R. Nagler, Olaf Schneewind, A. Murat Eren, and Albert Bendelac. 2019. 'B Cell Superantigens in the Human Intestinal Microbiota'. *Science Translational Medicine* 11 (507): eaau9356. <https://doi.org/10.1126/scitranslmed.aau9356>.
- Byndloss, Mariana X., Erin E. Olsan, Fabian Rivera-Chávez, Connor R. Tiffany, Stephanie A. Cevallos, Kristen L. Lokken, Teresa P. Torres, et al. 2017. 'Microbiota-Activated PPAR- $\gamma$  Signaling Inhibits Dysbiotic Enterobacteriaceae Expansion'. *Science* 357 (6351): 570–75. <https://doi.org/10.1126/science.aam9949>.
- Chen, Tingting, Wenmin Long, Chenhong Zhang, Shuang Liu, Liping Zhao, and Bruce R. Hamaker. 2017. 'Fiber-Utilizing Capacity Varies in Prevotella- versus Bacteroides-Dominated Gut Microbiota'. *Scientific Reports* 7 (June):2594. <https://doi.org/10.1038/s41598-017-02995-4>.
- Chuttani, H. K., K. Jain, and R. C. Misra. 1971. 'Small Bowel in Typhoid Fever'. *Gut* 12 (9): 709–12.
- Constantinides, Bede, Martin Hunt, and Derrick W Crook. 2023. 'Hostile: Accurate Decontamination of Microbial Host Sequences'. *Bioinformatics* 39 (12): btad728. <https://doi.org/10.1093/bioinformatics/btad728>.
- Darton, Thomas C, James E Meiring, Susan Tonks, Md Arifuzzaman Khan, Farhana Khanam, Mila Shakya, Deus Thindwa, et al. 2017. 'The STRATAA Study Protocol: A Programme to Assess the Burden of Enteric Fever in Bangladesh, Malawi and Nepal Using Prospective Population Census, Passive Surveillance, Serological Studies and Healthcare Utilisation Surveys'. *BMJ Open* 7 (6): e016283. <https://doi.org/10.1136/bmjopen-2017-016283>.
- Durack, Juliana, and Susan V. Lynch. 2019. 'The Gut Microbiome: Relationships with Disease and Opportunities for Therapy'. *The Journal of Experimental Medicine* 216 (1): 20–40. <https://doi.org/10.1084/jem.20180448>.
- Dyson, Zoe A., Philip M. Ashton, Farhana Khanam, Angeziwa Chunga Chirambo, Mila Shakya, James E. Meiring, Susan Tonks, et al. 2024. 'Pathogen Diversity and Antimicrobial Resistance Transmission of Salmonella Enterica Serovars Typhi and Paratyphi A in Bangladesh, Nepal, and Malawi: A Genomic Epidemiological Study'. *The Lancet Microbe* 0 (0). [https://doi.org/10.1016/S2666-5247\(24\)00047-8](https://doi.org/10.1016/S2666-5247(24)00047-8).
- Dyson, Zoe A., Philip M. Ashton, Farhana Khanam, Angeziwa Chunga, Mila Shakya, James Meiring, Susan Tonks, et al. 2023. 'Genomic Epidemiology and Antimicrobial Resistance Transmission of Salmonella Typhi and Paratyphi A at Three Urban Sites in Africa and Asia'. medRxiv. <https://doi.org/10.1101/2023.03.11.23286741>.
- Gibani, Malick M., Celina Jin, Sonu Shrestha, Maria Moore, Lily Norman, Merryn Voysey, Elizabeth Jones, et al. 2020. 'Homologous and Heterologous Re-Challenge with Salmonella Typhi and Salmonella Paratyphi A in a Randomised Controlled Human Infection Model'. *PLOS Neglected Tropical Diseases* 14 (10): e0008783. <https://doi.org/10.1371/journal.pntd.0008783>.
- Godinez, Ivan, A. Marijke Keestra, Alanna Spees, and Andreas J. Bäumlner. 2011. 'The IL-23 Axis in Salmonella Gastroenteritis'. *Cellular Microbiology* 13 (11): 1639–47. <https://doi.org/10.1111/j.1462-5822.2011.01637.x>.
- Gupta, Vinod K., Sandip Paul, and Chitra Dutta. 2017. 'Geography, Ethnicity or Subsistence-Specific Variations in Human Microbiome Composition and Diversity'. *Frontiers in Microbiology* 8 (June):1162. <https://doi.org/10.3389/fmicb.2017.01162>.

- Haak, Bastiaan W, Hanna K de Jong, Sarantos Kostidis, Martin Giera, Rapeephan R Maude, Rasheda Samad, Lalith Wijedoru, et al. 2020. 'Altered Patterns of Compositional and Functional Disruption of the Gut Microbiota in Typhoid Fever and Nontyphoidal Febrile Illness'. *Open Forum Infectious Diseases* 7 (7). <https://doi.org/10.1093/ofid/ofaa251>.
- Hoffmann, Thomas W., Hang-Phuong Pham, Chantal Bridonneau, Camille Aubry, Bruno Lamas, Camille Martin-Gallaussiaux, Marco Moroldo, et al. 2016. 'Microorganisms Linked to Inflammatory Bowel Disease-Associated Dysbiosis Differentially Impact Host Physiology in Gnotobiotic Mice'. *The ISME Journal* 10 (2): 460–77. <https://doi.org/10.1038/ismej.2015.127>.
- Huus, Kelsey E., and Ruth E. Ley. 2021. 'Blowing Hot and Cold: Body Temperature and the Microbiome'. *mSystems* 6 (5): 10.1128/msystems.00707-21. <https://doi.org/10.1128/msystems.00707-21>.
- Jacobson, Amanda, Lilian Lam, Manohary Rajendram, Fiona Tamburini, Jared Honeycutt, Trung Pham, Will Van Treuren, et al. 2018. 'A Gut Commensal-Produced Metabolite Mediates Colonization Resistance to Salmonella Infection'. *Cell Host & Microbe* 24 (2): 296-307.e7. <https://doi.org/10.1016/j.chom.2018.07.002>.
- Jin, Celina, Malick M. Gibani, Maria Moore, Helene B. Juel, Elizabeth Jones, James Meiring, Victoria Harris, et al. 2017. 'Efficacy and Immunogenicity of a Vi-Tetanus Toxoid Conjugate Vaccine in the Prevention of Typhoid Fever Using a Controlled Human Infection Model of Salmonella Typhi: A Randomised Controlled, Phase 2b Trial'. *The Lancet* 390 (10111): 2472–80. [https://doi.org/10.1016/S0140-6736\(17\)32149-9](https://doi.org/10.1016/S0140-6736(17)32149-9).
- Khanam, Farhana, Thomas C. Darton, James E. Meiring, Protup Kumer Sarker, Prasanta Kumar Biswas, Md Amirul Islam Bhuiyan, Nazmul Hasan Rajib, et al. 2021. 'Salmonella Typhi Stool Shedding by Patients With Enteric Fever and Asymptomatic Chronic Carriers in an Endemic Urban Setting'. *The Journal of Infectious Diseases* 224 (12 Suppl 2): S759–63. <https://doi.org/10.1093/infdis/jiab476>.
- Larsen, Jeppe Madura. 2017. 'The Immune Response to Prevotella Bacteria in Chronic Inflammatory Disease'. *Immunology* 151 (4): 363–74. <https://doi.org/10.1111/imm.12760>.
- Lee, Ja-Young, Hisashi Arai, Yusuke Nakamura, Satoru Fukiya, Masaru Wada, and Atsushi Yokota. 2013. 'Contribution of the 7 $\beta$ -Hydroxysteroid Dehydrogenase from Ruminococcus Gnavus N53 to Ursodeoxycholic Acid Formation in the Human Colon'. *Journal of Lipid Research* 54 (11): 3062–69. <https://doi.org/10.1194/jlr.M039834>.
- Leshem, Avner, Timur Liwinski, and Eran Elinav. 2020. 'Immune-Microbiota Interplay and Colonization Resistance in Infection'. *Molecular Cell* 78 (4): 597–613. <https://doi.org/10.1016/j.molcel.2020.03.001>.
- Libertucci, Josie, and Vincent B. Young. 2019. 'The Role of the Microbiota in Infectious Diseases'. *Nature Microbiology* 4 (1): 35–45. <https://doi.org/10.1038/s41564-018-0278-4>.
- Lopez, Christopher A., Brittany M. Miller, Fabian Rivera-Chávez, Eric M. Velazquez, Mariana X. Byndloss, Alfredo Chávez-Arroyo, Kristen L. Lokken, Renée M. Tsohis, Sebastian E. Winter, and Andreas J. Bäumlner. 2016. 'Virulence Factors Enhance Citrobacter Rodentium Expansion through Aerobic Respiration'. *Science (New York, N. Y.)* 353 (6305): 1249–53. <https://doi.org/10.1126/science.aag3042>.
- MacPherson, Eleanor E., Joanna Reynolds, Esnart Sanudi, Alexander Nkaombe, John Mankhomwa, Justin Dixon, and Clare I. R. Chandler. 2022. 'Understanding Antimicrobial Use in Subsistence Farmers in Chikwawa District Malawi, Implications for Public Awareness Campaigns'. *PLOS Global Public Health* 2 (6): e0000314. <https://doi.org/10.1371/journal.pgph.0000314>.
- McGrath, Conor J., Edgaras Laveckis, Andrew Bell, Emmanuelle Crost, Nathalie Juge, and Stephanie Schüller. 2022. 'Development of a Novel Human Intestinal Model to Elucidate the Effect of Anaerobic Commensals on Escherichia Coli Infection'. *Disease Models & Mechanisms* 15 (4): dmm049365. <https://doi.org/10.1242/dmm.049365>.

- Meiring, James E., Farhana Khanam, Buddha Basnyat, Richelle C. Charles, John A. Crump, Frederic Debellut, Kathryn E. Holt, et al. 2023. 'Typhoid Fever'. *Nature Reviews Disease Primers* 9 (1): 1–18. <https://doi.org/10.1038/s41572-023-00480-z>.
- Meiring, James E., Mila Shakya, Farhana Khanam, Merryn Voysey, Maile T. Phillips, Susan Tonks, Deus Thindwa, et al. 2021. 'Burden of Enteric Fever at Three Urban Sites in Africa and Asia: A Multicentre Population-Based Study'. *The Lancet Global Health* 9 (12): e1688–96. [https://doi.org/10.1016/S2214-109X\(21\)00370-3](https://doi.org/10.1016/S2214-109X(21)00370-3).
- Musicha, Patrick, Jennifer E Cornick, Naor Bar-Zeev, Neil French, Clemens Masesa, Brigitte Denis, Neil Kennedy, et al. 2017. 'Trends in Antimicrobial Resistance in Bloodstream Infection Isolates at a Large Urban Hospital in Malawi (1998–2016): A Surveillance Study'. *The Lancet Infectious Diseases* 17 (10): 1042–52. [https://doi.org/10.1016/S1473-3099\(17\)30394-8](https://doi.org/10.1016/S1473-3099(17)30394-8).
- Obuya, Sarah, Amr Elkholy, Nagavardhini Avuthu, Michael Behring, Prachi Bajpai, Sumit Agarwal, Hyung-Gyoon Kim, et al. 2022. 'A Signature of *Prevotella Copri* and *Faecalibacterium Prausnitzii* Depletion, and a Link with Bacterial Glutamate Degradation in the Kenyan Colorectal Cancer Patients'. *Journal of Gastrointestinal Oncology* 13 (5): 2282–92. <https://doi.org/10.21037/jgo-22-116>.
- Pascal Andreu, Victória, Hannah E. Augustijn, Koen van den Berg, Justin J. J. van der Hooft, Michael A. Fischbach, and Marnix H. Medema. 2021. 'BiG-MAP: An Automated Pipeline To Profile Metabolic Gene Cluster Abundance and Expression in Microbiomes'. *mSystems* 6 (5): e00937-21. <https://doi.org/10.1128/mSystems.00937-21>.
- Pascal Andreu, Victòria, Hannah E. Augustijn, Lianmin Chen, Alexandra Zhernakova, Jingyuan Fu, Michael A. Fischbach, Dylan Dodd, and Marnix H. Medema. 2023. 'gutSMASH Predicts Specialized Primary Metabolic Pathways from the Human Gut Microbiota'. *Nature Biotechnology* 41 (10): 1416–23. <https://doi.org/10.1038/s41587-023-01675-1>.
- Patel, Priyanka D., Pratiksha Patel, Yuanyuan Liang, James E. Meiring, Theresa Misiri, Felistas Mwakiseghile, J. Kathleen Tracy, et al. 2021. 'Safety and Efficacy of a Typhoid Conjugate Vaccine in Malawian Children'. *New England Journal of Medicine* 385 (12): 1104–15. <https://doi.org/10.1056/NEJMoa2035916>.
- Qureshi, Sonia, Noshi Maria, Tabish Chawla, Junaid Iqbal, Abdul Momin Kazi, Mehreen Adnan, Aneeta Hotwani, et al. 2024. 'The Frequency and Associated Factors of Typhoid Carriage in Patients Undergoing Cholecystectomy for Gallbladder Disease in Pakistan: A Cross-Sectional Study'. *PLoS Neglected Tropical Diseases* 18 (6): e0011775. <https://doi.org/10.1371/journal.pntd.0011775>.
- Raffatellu, Manuela, Renato L. Santos, David E. Verhoeven, Michael D. George, R. Paul Wilson, Sebastian E. Winter, Ivan Godinez, et al. 2008. 'Simian Immunodeficiency Virus-Induced Mucosal Interleukin-17 Deficiency Promotes *Salmonella* Dissemination from the Gut'. *Nature Medicine* 14 (4): 421–28. <https://doi.org/10.1038/nm1743>.
- Rogers, Andrew W. L., Renée M. Tsohis, and Andreas J. Bäumler. 2021. 'Salmonella versus the Microbiome'. *Microbiology and Molecular Biology Reviews: MMBR* 85 (1): e00027-19. <https://doi.org/10.1128/MMBR.00027-19>.
- Shreiner, Andrew B., John Y. Kao, and Vincent B. Young. 2015. 'The Gut Microbiome in Health and in Disease'. *Current Opinion in Gastroenterology* 31 (1): 69–75. <https://doi.org/10.1097/MOG.0000000000000139>.
- Sohn, Jiho, Lu Li, Lixia Zhang, Robert J. Genco, Karen L. Falkner, Hervé Tettelin, Aryn M. Rowsam, et al. 2023. 'Periodontal Disease Is Associated with Increased Gut Colonization of Pathogenic *Haemophilus parainfluenzae* in Patients with Crohn's Disease'. *Cell Reports* 42 (2): 112120. <https://doi.org/10.1016/j.celrep.2023.112120>.
- Stanaway, Jeffrey D., Robert C. Reiner, Brigitte F. Blacker, Ellen M. Goldberg, Ibrahim A. Khalil, Christopher E. Troeger, Jason R. Andrews, et al. 2019. 'The Global Burden of Typhoid and Paratyphoid Fevers: A Systematic Analysis for the Global Burden of

- Disease Study 2017'. *The Lancet Infectious Diseases* 19 (4): 369–81. [https://doi.org/10.1016/S1473-3099\(18\)30685-6](https://doi.org/10.1016/S1473-3099(18)30685-6).
- Stecher, Bärbel, Riccardo Robbiani, Alan W. Walker, Astrid M. Westendorf, Manja Barthel, Marcus Kremer, Samuel Chaffron, et al. 2007. 'Salmonella Enterica Serovar Typhimurium Exploits Inflammation to Compete with the Intestinal Microbiota'. *PLOS Biology* 5 (10): e244. <https://doi.org/10.1371/journal.pbio.0050244>.
- Steele, A. Duncan, Deborah C. Hay Burgess, Zoey Diaz, Megan E. Carey, and Anita K. M. Zaidi. 2016. 'Challenges and Opportunities for Typhoid Fever Control: A Call for Coordinated Action'. *Clinical Infectious Diseases: An Official Publication of the Infectious Diseases Society of America* 62 (Suppl 1): S4–8. <https://doi.org/10.1093/cid/civ976>.
- Waddington, Claire S., Thomas C. Darton, William E. Woodward, Brian Angus, Myron M. Levine, and Andrew J. Pollard. 2014. 'Advancing the Management and Control of Typhoid Fever: A Review of the Historical Role of Human Challenge Studies'. *The Journal of Infection* 68 (5): 405–18. <https://doi.org/10.1016/j.jinf.2014.01.006>.
- Winter, Sebastian E., Parameth Thiennimitr, Maria G. Winter, Brian P. Butler, Douglas L. Huseby, Robert W. Crawford, Joseph M. Russell, et al. 2010. 'Gut Inflammation Provides a Respiratory Electron Acceptor for Salmonella'. *Nature* 467 (7314): 426–29. <https://doi.org/10.1038/nature09415>.
- Yang, Xinglin, Kathryn R. Stein, and Howard C. Hang. 2023. 'Anti-Infective Bile Acids Bind and Inactivate a Salmonella Virulence Regulator'. *Nature Chemical Biology* 19 (1): 91–100. <https://doi.org/10.1038/s41589-022-01122-3>.
- Yatsunencko, Tanya, Federico E. Rey, Mark J. Manary, Indi Trehan, Maria Gloria Dominguez-Bello, Monica Contreras, Magda Magris, et al. 2012. 'Human Gut Microbiome Viewed across Age and Geography'. *Nature* 486 (7402): 222–27. <https://doi.org/10.1038/nature11053>.
- Zhang, Yan, Arthur Brady, Cheron Jones, Yang Song, Thomas C. Darton, Claire Jones, Christoph J. Blohmke, et al. 2018. 'Compositional and Functional Differences in the Human Gut Microbiome Correlate with Clinical Outcome Following Infection with Wild-Type Salmonella Enterica Serovar Typhi'. *mBio* 9 (3): e00686-18. <https://doi.org/10.1128/mBio.00686-18>.

## Supplementary Figures

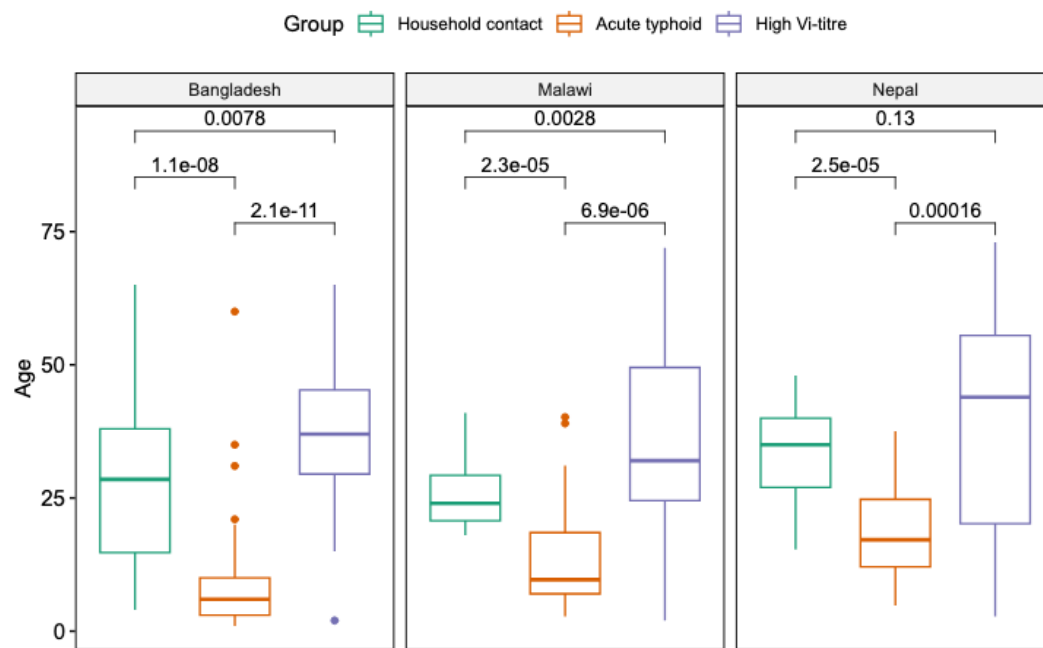

Supplementary Figure 1: Age distribution of participants in the healthy control, acute typhoid, and presumptive carrier groups, broken down by study site. Statistical annotations are the p-values resulting from Wilcoxon rank sum tests.



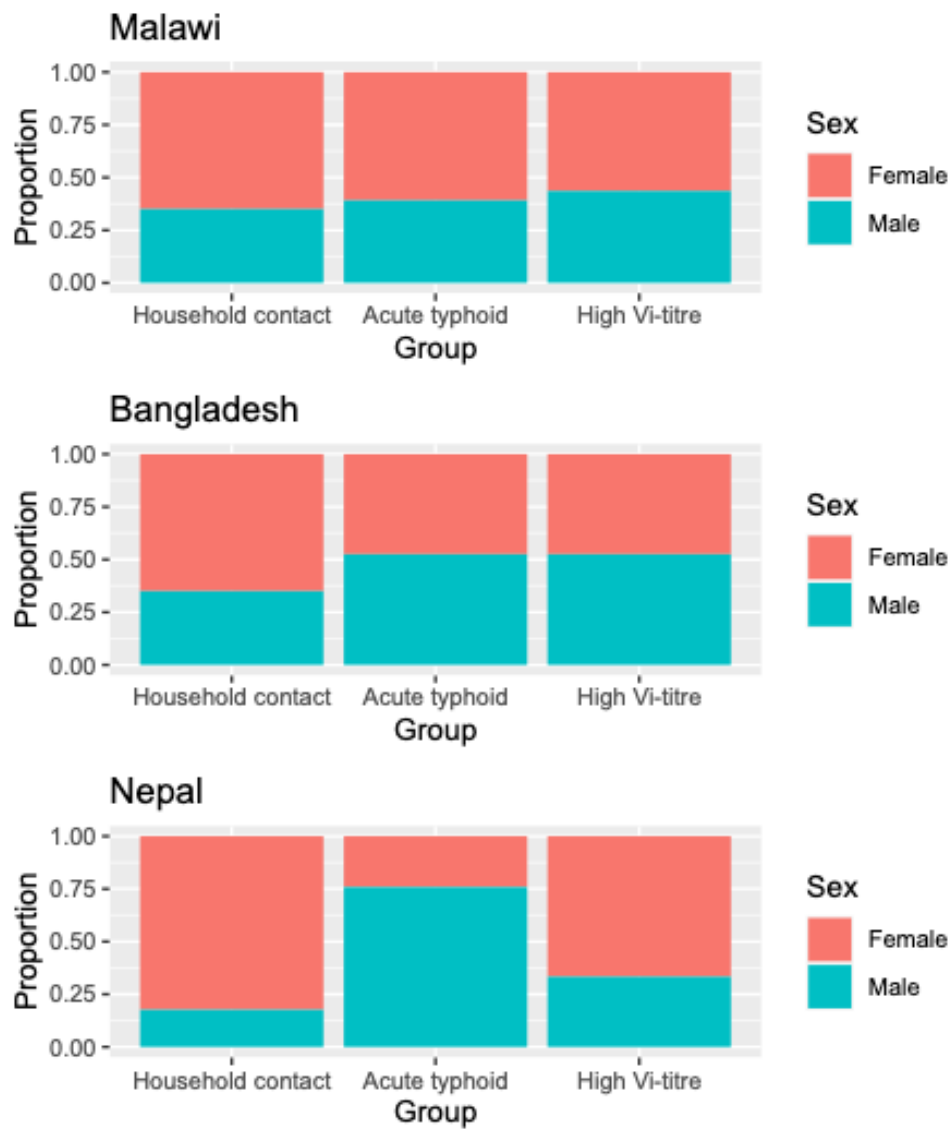

Supplementary Figure 2: Sex split of the different participant groups across the different sites.

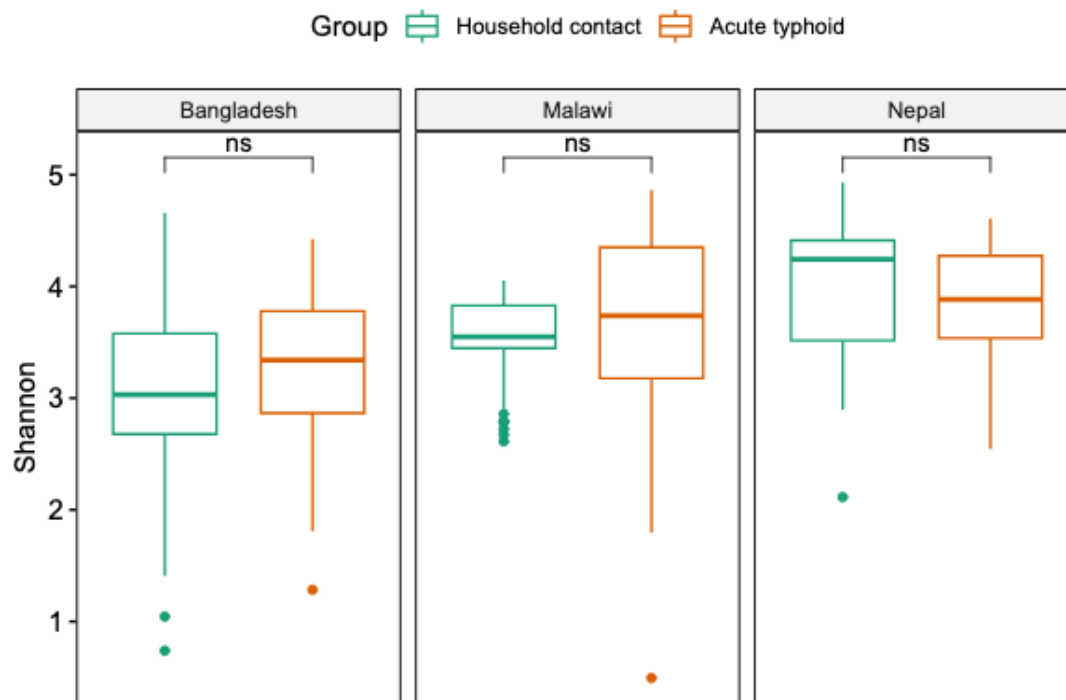

Supplementary Figure 3: Alpha diversity for acute typhoid fever patients and healthy household contacts presented separately, and for each study site.

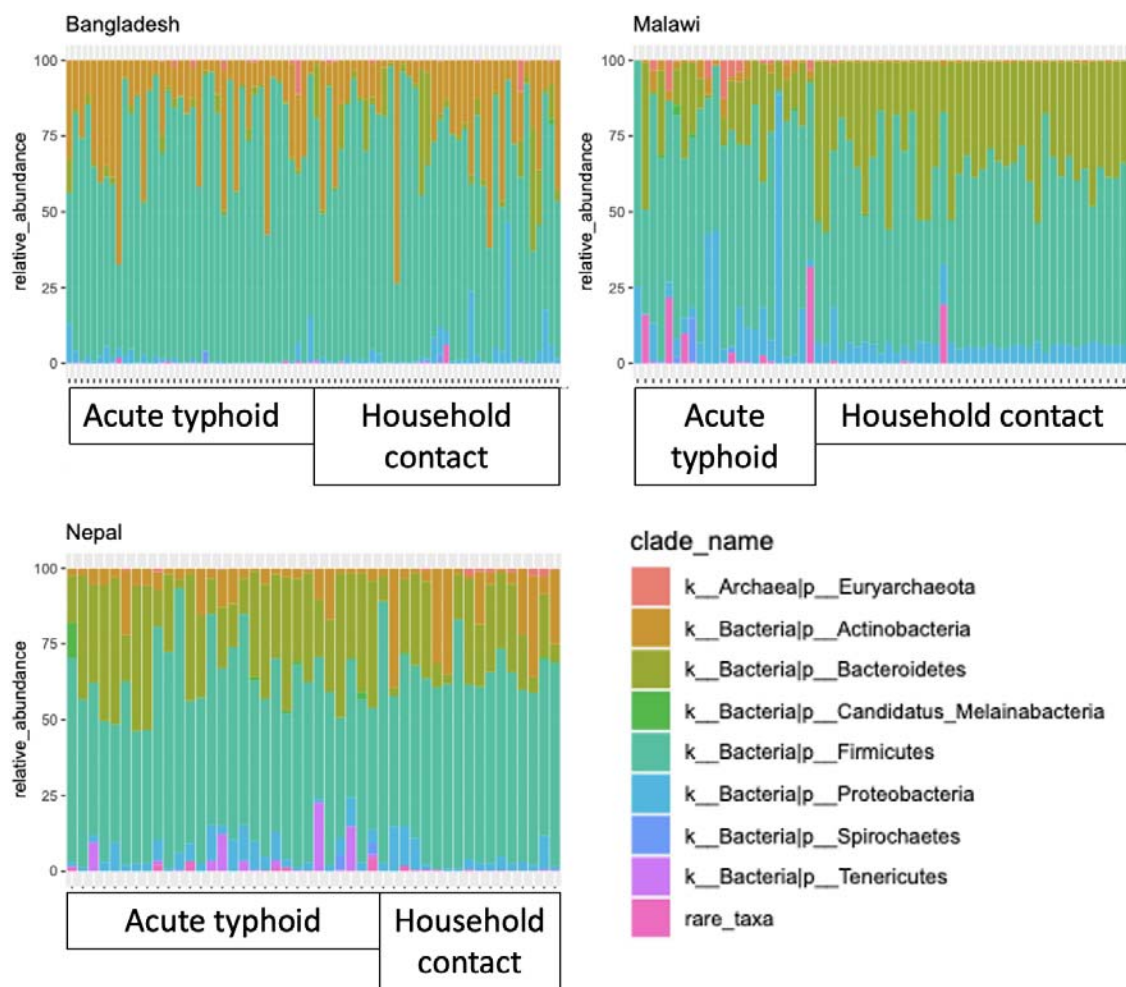

Supplementary Figure 4: Bar chart showing the prevalence of eight common phyla in acute typhoid patients and healthy household contacts, for each study site.

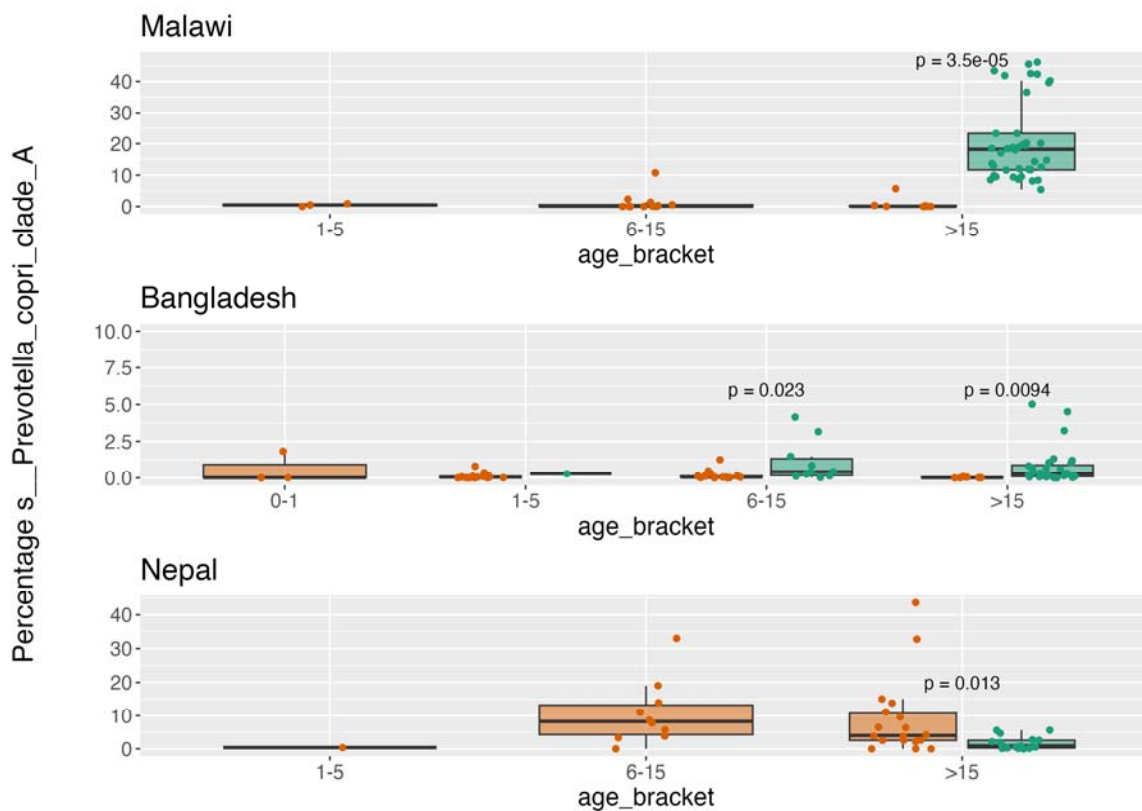

Supplementary Figure 5: Prevalence of *Prevotella copri* clade A across age brackets in Malawi and Bangladesh

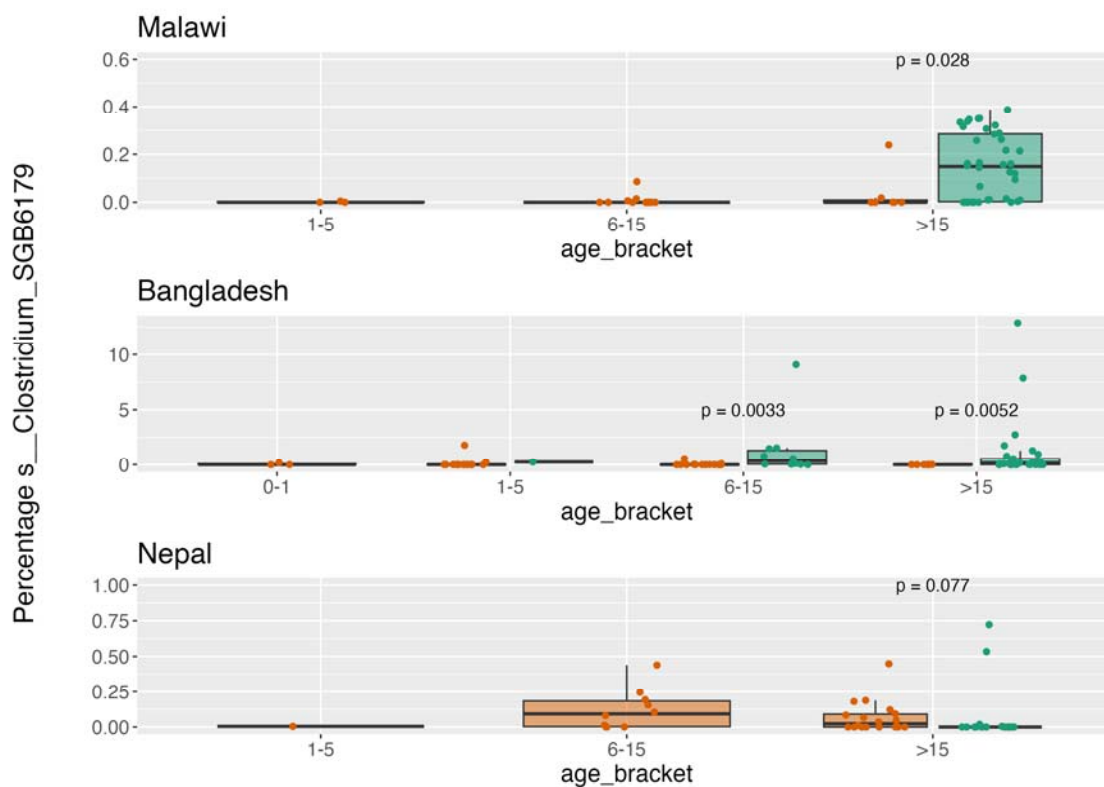

Supplementary Figure 6: Prevalence of *Clostridium* SGB6179 across age brackets in Malawi and Bangladesh

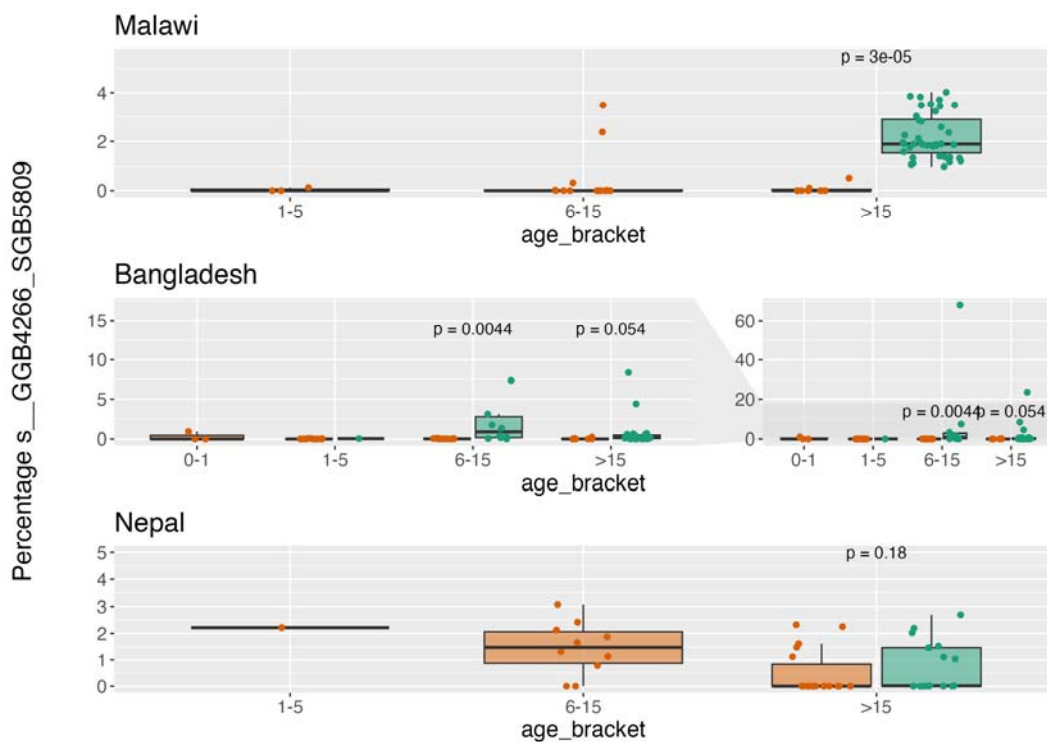

Supplementary Figure 7: Prevalence of *GGB4266\_SGB5809* across age brackets in Malawi and Bangladesh

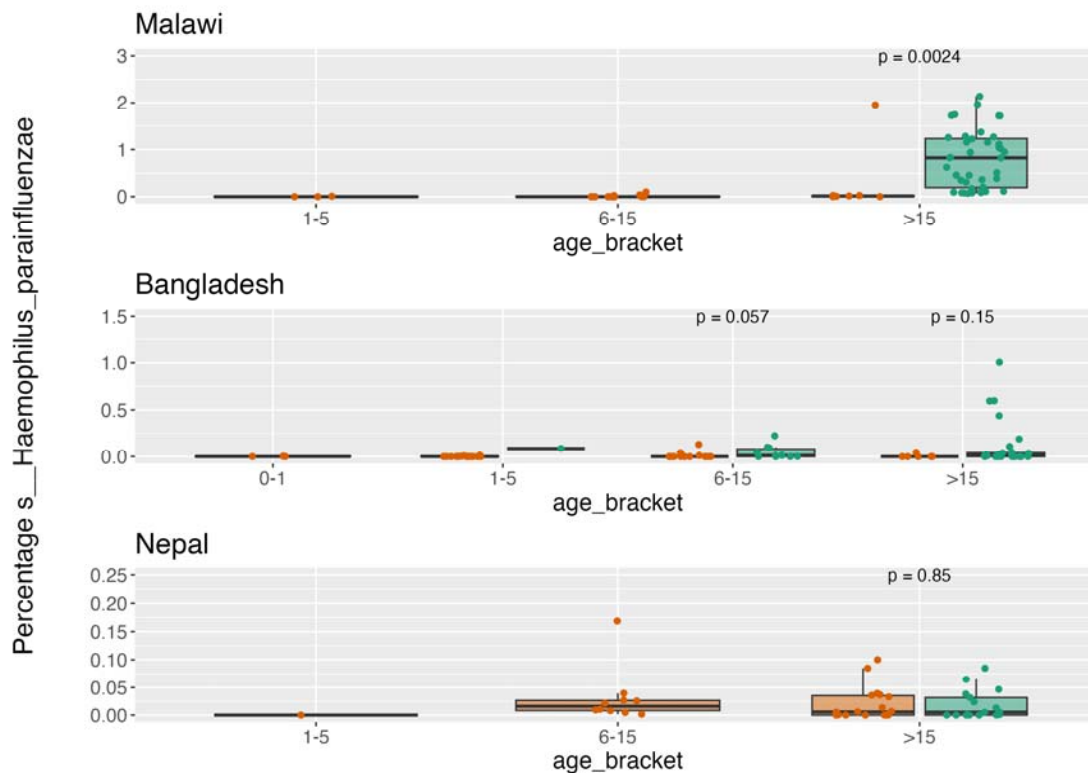

Supplementary Figure 8: Prevalence of *Haemophilus parainfluenzae* across age brackets in Malawi and Bangladesh

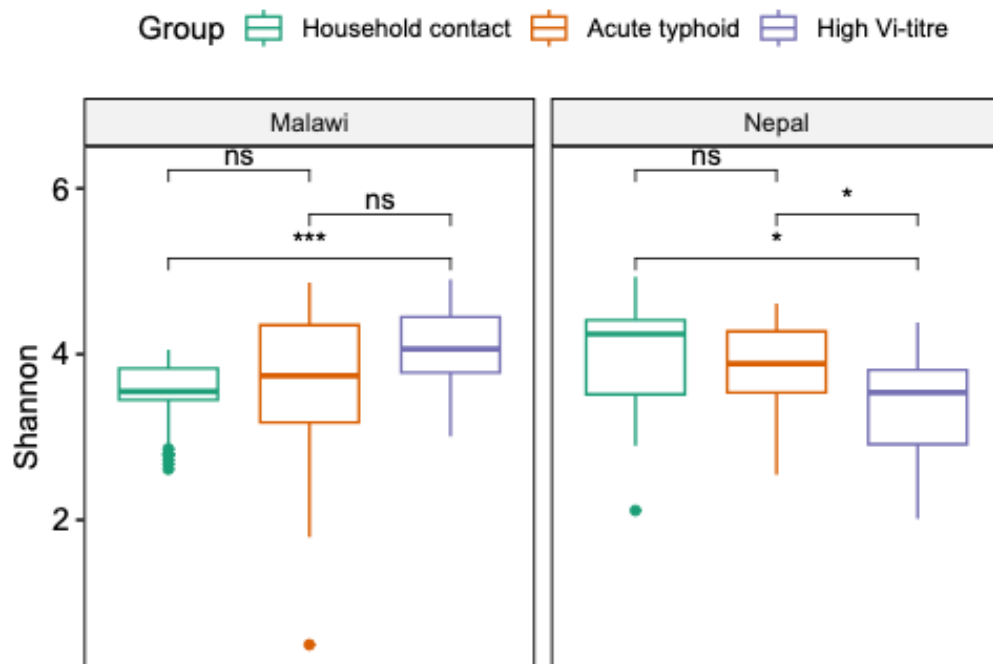

Supplementary Figure 9: Alpha diversity of acute typhoid patients, high Vi-titre participants, and healthy household contacts from Malawi and Nepal. Statistical annotations are the p-values resulting from Wilcoxon rank sum tests. A single asterisk indicates a p-value < 0.01, triple asterisk indicates a p-value < 0.0001.

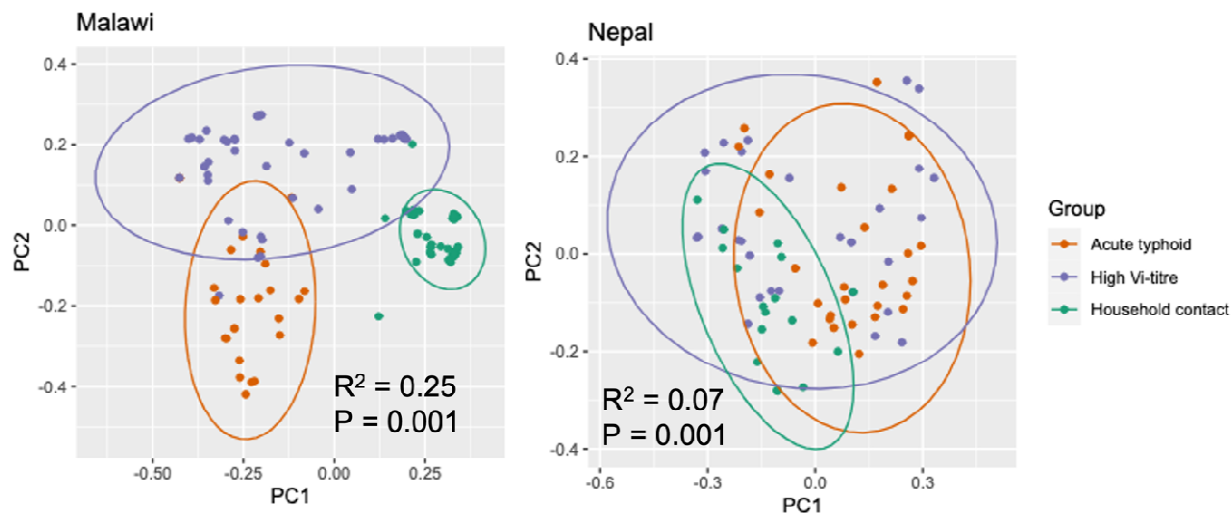

Supplementary Figure 10: Beta diversity of acute typhoid fever, high Vi-titre participants, and healthy household contacts from Malawi

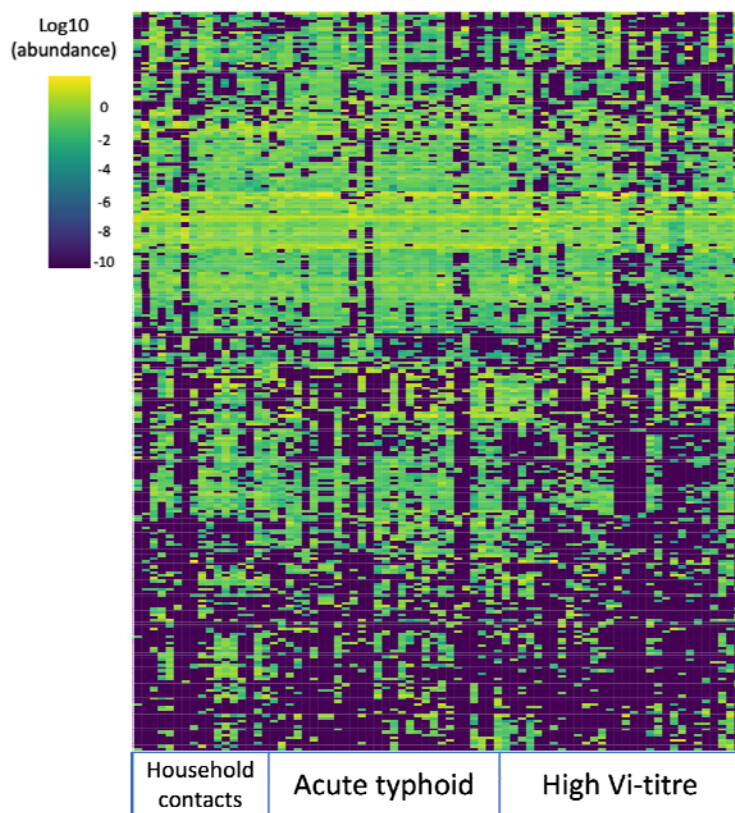

Supplementary Figure 11: Heatmap of top 400 taxa from Nepalese participants – household contacts, acute typhoid cases and high-Vi titre participants.

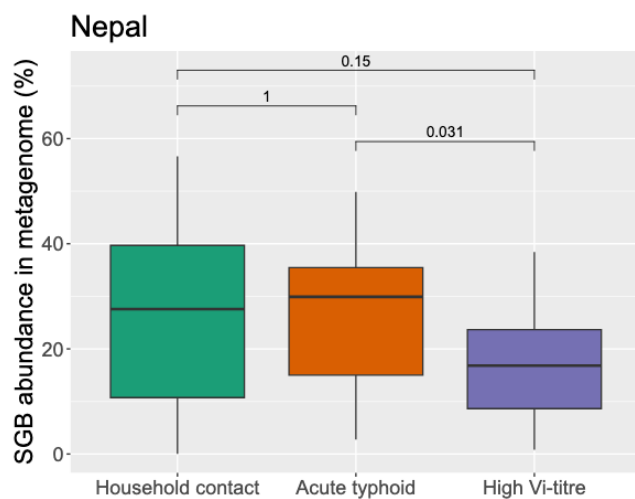

Supplementary Figure 12: Proportion of the microbiome assigned to SGBs in Nepal across the three participant groups

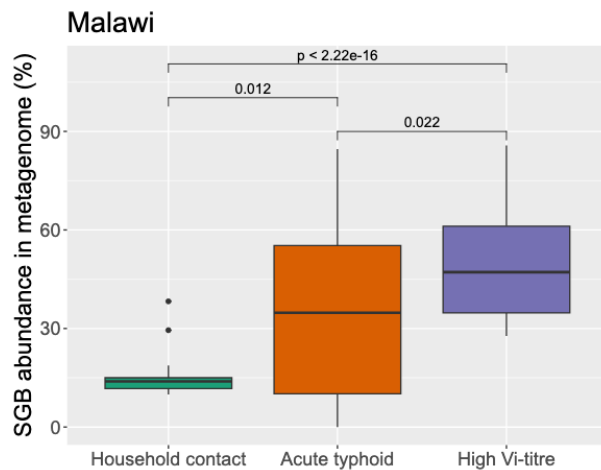

Supplementary Figure 13: The abundance of species only described as species genome bins in the metaphlan database from Malawian control, acute typhoid, and presumptive carrier participants.



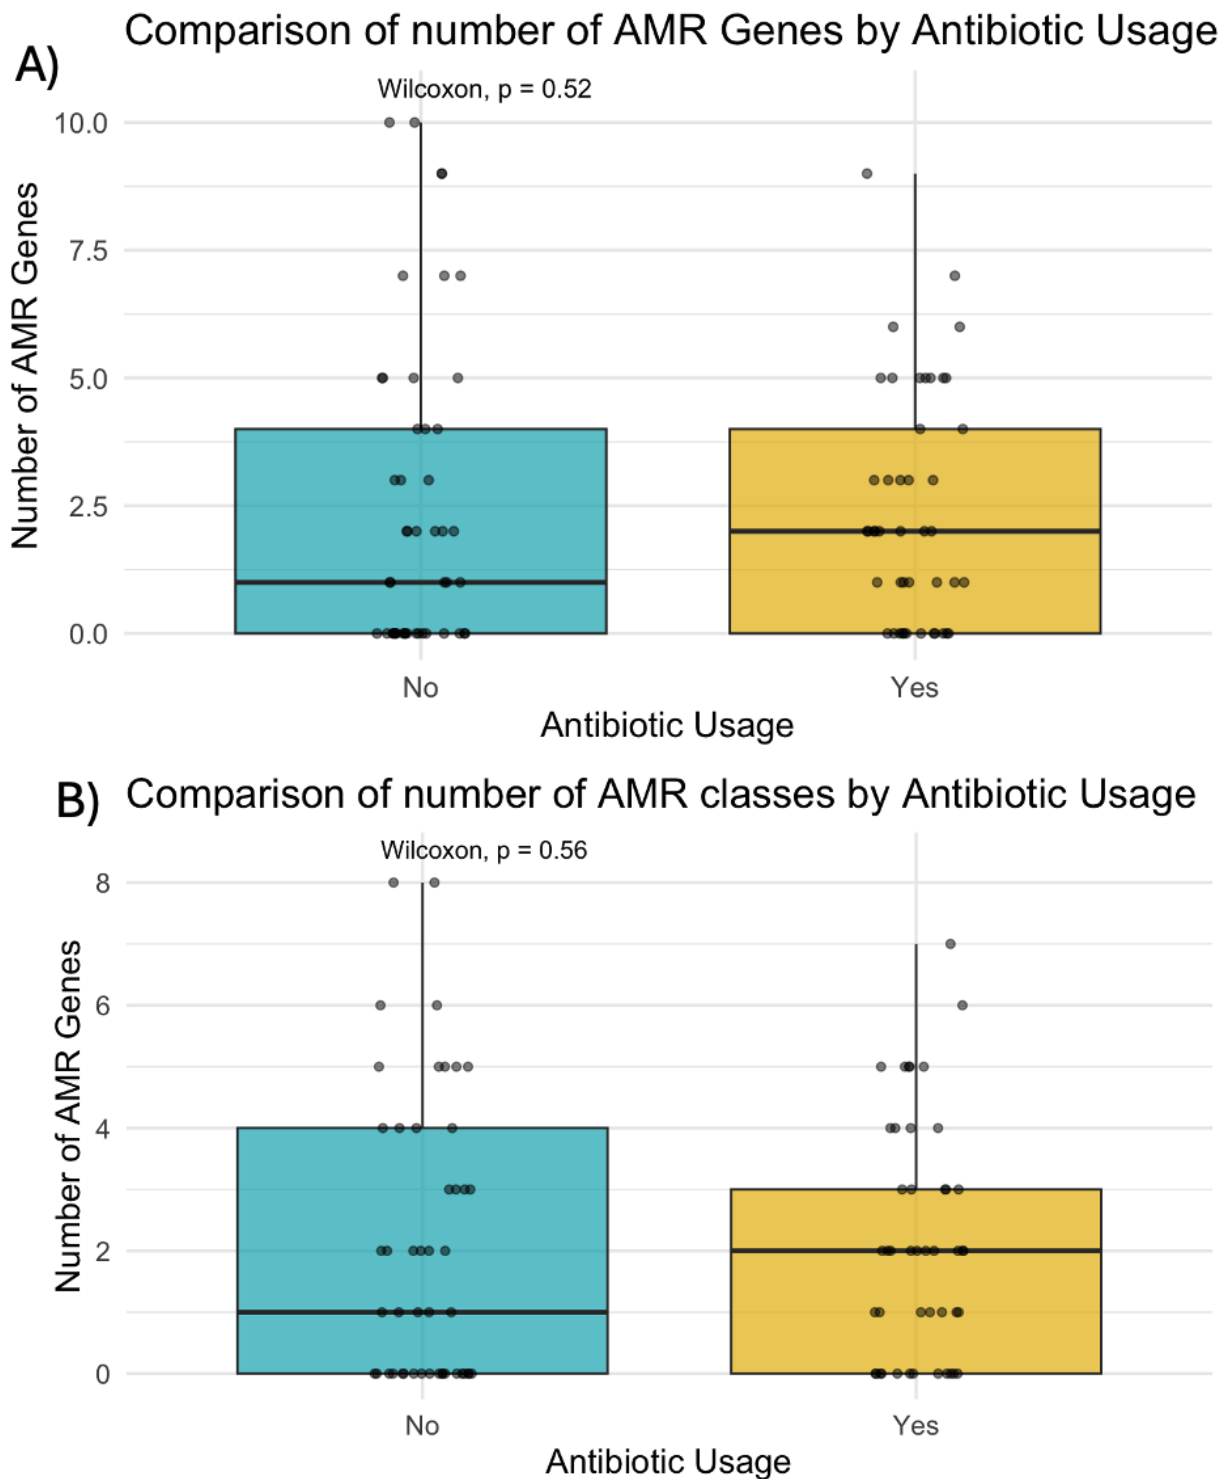

Supplementary Figure 14: Comparison of A) the number of AMR genes and B) the number of AMR gene classes identified in participants from all three sites who did and did not report antibiotic usage prior to sampling

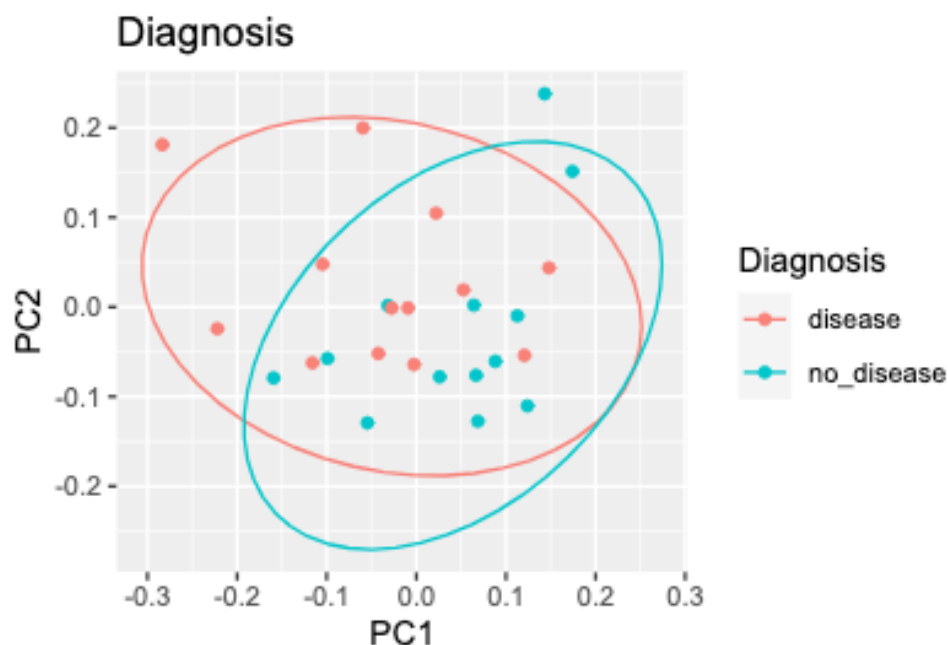

Supplementary Figure 15: Beta-diversity plot of 26 CHIM participants challenged with *S. Typhi* or *S. Paratyphi*, coloured by whether they were diagnosed with typhoid/paratyphoid fever following pathogen exposure.

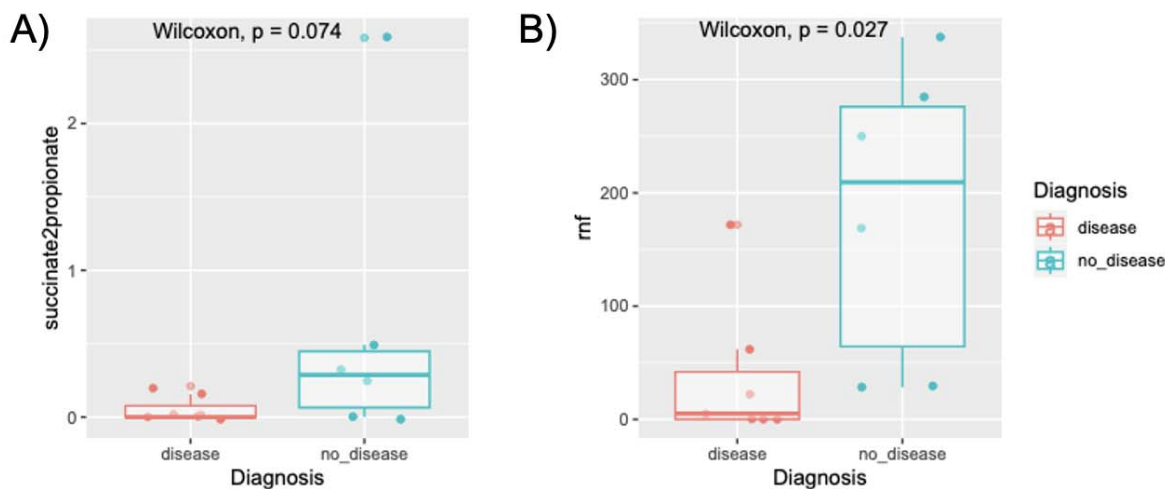

Supplementary Figure 16: Comparison of prevalence of A) succinate2propionate and B) rnf MGCs between people who were susceptible (disease) and non-susceptible (no\_disease) to challenge with *S. Typhi*.

## Supplementary Table captions

Supplementary Table 1: ANOVA analysis of alpha diversity from healthy household contacts and typhoid fever patients from all three sites

*Supplementary Table 2: PERMANOVA analysis of beta diversity from healthy household contacts and typhoid fever patients from all three sites*

*Supplementary Table 3: PERMANOVA analysis of beta diversity from healthy household contacts and typhoid fever patients from all Bangladesh*

*Supplementary Table 4: PERMANOVA analysis of beta diversity from healthy household contacts and typhoid fever patients from Malawi*

*Supplementary Table 5: PERMANOVA analysis of beta diversity from healthy household contacts and typhoid fever patients from Nepal*

*Supplementary Table 6: Median proportion of reads assigned to different phyla from healthy household contacts and typhoid fever patients from all three sites*

*Supplementary Table 7: Species associated with health or disease in Bangladesh only. Positive co-efficient (coef) means the species is associated with health, negative co-efficient means it's associated with typhoid fever.*

*Supplementary Table 8: Species associated with health or disease in Malawi only. Positive co-efficient (coef) means the species is associated with health, negative co-efficient means it's associated with typhoid fever.*

*Supplementary Table 9: Full information about Metabolic Gene Clusters associated with health in both Bangladesh and Malawi.*

*Supplementary Table 10: ANOVA analysis of alpha diversity from healthy household contacts, typhoid fever patients, and high Vi-titre participants from Malawi and Nepal*

*Supplementary Table 11: PERMANOVA analysis of beta diversity from healthy household contacts, typhoid fever patients, and high Vi-titre participants from Malawi*

*Supplementary Table 12: PERMANOVA analysis of beta diversity from healthy household contacts, typhoid fever patients, and high Vi-titre participants from Nepal*

*Supplementary Table 13: Species associated with high-Vi titre compared with household controls in Malawi only. Positive coefficient (coef) is associated with health, negative co-efficient is associated with high-Vi titre.*

*Supplementary Table 14: Metagenome identification of AMR genes commonly identified in Salmonella Typhi per country*

*Supplementary Table 15: Metagenome identification of AMR genes commonly identified in Salmonella Typhi per participant group*

*Supplementary Table 16: The average weighted importance of species to random forest classification of samples as being from control or presumptive carrier participants.*

*Supplementary Table 17: The correlation between the proportion of S. Typhi isolates and the proportion of microbiome samples from each site with AMR genes to quinolones, sulphonamides and tetracycline.*

*Supplementary Table 18: Demographic information on CHIM participants*

*Supplementary Table 19: Alpha diversity ANOVA results for CHIM data*

*Supplementary Table 20: PERMANOVA analysis of beta-diversity amongst CHIM participants challenged with S. Typhi and S. Paratyphi*

*Supplementary Table 21: Species associated with household controls vs both typhoid fever and high Vi titre from Malawi.*

*Supplementary Table 22: SGBs identified in Malawi*

*Supplementary Table 23: Associations between MGCs belonging to classes identified associated with household controls compared with acute typhoid cases and no disease following challenge in the CHIM*

*Supplementary Table 24: MGCs significantly different between household contacts and typhoid cases in Nepal*

*Supplementary Table 25: MGCs significantly different between household contacts and typhoid cases in Bangladesh*

*Supplementary Table 26: MGCs significantly different between household contacts and typhoid cases in Malawi*

*Supplementary Table 27: Endemic country cohort participant information*

*Supplementary Table 28: metadata on CHIM samples*
