# Interplay Between the Gut Microbiome and Typhoid Fever: Insights from Endemic Countries and a Controlled Human Infection Model

Philip M. Ashton<sup>1,2</sup>, Leonardos Mageiros<sup>3§</sup>, James E. Meiring<sup>1,2,4§</sup>, Angeziwa Chunga Chirambo<sup>1,5§</sup>, Farhana Khanam<sup>6§</sup>, Sabina Dongol<sup>9,10§</sup>, Happy Banda<sup>1</sup>, Abhilasha Karkey<sup>9,10</sup>, Lorena Preciado Llanes<sup>12</sup>, Helena Thomaides-Brears<sup>12</sup>, Malick Gibani<sup>12,13</sup>, Nazmul Hasan Rajib<sup>6</sup>, Nazia Rahman<sup>6</sup>, Prasanta Kumar Biswas<sup>6</sup>, Md Amirul Islam Bhuiyan<sup>6</sup>, Sally Kay<sup>7</sup>, Kate Auger<sup>7</sup>, Olivier Seret<sup>7</sup>, Nicholas R. Thomson<sup>7,8</sup>, Andrew J Pollard<sup>12,14</sup>, Stephen Baker<sup>15</sup>, Buddha Basnyat<sup>9,17</sup>, John D. Clemens<sup>6</sup>, Christiane Dolecek<sup>17</sup>, Sarah J. Dunstan<sup>18</sup>, Gordon Dougan<sup>15,16</sup>, Robert S. Heyderman<sup>19</sup>, Virginia E. Pitzer<sup>20</sup>, Firdausi Qadri<sup>6</sup>, Melita A. Gordon<sup>1,2</sup>, Kathryn E. Holt<sup>3,8\*</sup>, Thomas C. Darton<sup>4\*</sup>, STRATAA Study Group<sup>21</sup>

1. Malawi-Liverpool-Wellcome Programme, Blantyre, Malawi
2. Institute of Infection, Veterinary and Ecological Sciences, University of Liverpool, Liverpool, UK
3. Department of Infectious Diseases, School of Translational Medicine, Monash University, Melbourne, Victoria, Australia
4. Clinical Infection Research Group, Division of Clinical Medicine, School of Medicine & Population Health, and The Florey Institute for Infection, University of Sheffield, UK
5. Department of Medical Laboratory Sciences, School of Life Sciences and Allied Health Professions, Kamuzu University of Health Sciences, Malawi
6. International Centre for Diarrhoeal Diseases Research, Bangladesh, Dhaka, Bangladesh
7. Wellcome Sanger Institute, Hinxton, UK
8. Department of Infection Biology, London School of Hygiene & Tropical Medicine, London, UK
9. Oxford University Clinical Research Unit, Patan Academy of Health Sciences, Kathmandu, Nepal
10. Patan Academy of Health Sciences, Patan Hospital, Lalitpur, Nepal
11. MRC Human Immunology Unit, MRC Weatherall Institute of Molecular Medicine, University of Oxford, Oxford, OX3 9DS, UK.
12. Oxford Vaccine Group, Department of Paediatrics, University of Oxford, Oxford, UK
13. Department of Infectious Disease, Imperial College London, London, UK
14. NIHR Oxford Biomedical Research Centre, Oxford, UK
15. Department of Medicine, University of Cambridge, Cambridge, UK
16. Centre for Translational Stem Cell Biology, Hong Kong
17. Nuffield Department of Medicine, Centre for Tropical Medicine and Global Health, University of Oxford, Oxford, UK
18. Department of Infectious Diseases, The University of Melbourne at The Peter Doherty Institute for Infection and Immunity, Melbourne, Australia
19. Research Department of Infection, Division of Infection and Immunity, University College London, London, UK

38 20. Department of Epidemiology of Microbial Diseases, Yale School of Public Health, Yale University,  
39 New Haven, CT, USA

40 21. Strategic Typhoid Alliance Across Asia and Africa Consortium

41

42 \$ contributed equally

43 \* contributed equally

44

45 Working title: Gut microbiome in relation to typhoid fever

46

# Abstract

Typhoid fever is a systemic infection caused by *Salmonella enterica* serovar Typhi (S. Typhi) invasion from the gut lumen. Transmission between people occurs through ingestion of contaminated food and water, particularly in settings with poor water and sanitation infrastructure, resulting in over 10 million illnesses annually. As the pathogen invades via the gastrointestinal tract, it is plausible that the gut microbiome may influence the outcome of S. Typhi exposure. There is some evidence that bacteria producing short-chain fatty acids (SCFAs) may create an environment unfavourable to invasive *Salmonella*, but data from humans is limited.

To investigate the association between gut microbiome and typhoid fever, we analysed samples collected from three all-age cohorts enrolled in a prospective surveillance study conducted across three settings where typhoid fever is endemic (Dhaka, Bangladesh; Blantyre, Malawi; and Kathmandu, Nepal). Cohorts consisted of acute typhoid fever patients (n=92), asymptomatic household contacts of typhoid fever patients (representing individuals who were likely exposed to S. Typhi but did not develop disease, n=97), and asymptomatic serosurvey participants with high Vi antibody titres (representing individuals who were exposed to S. Typhi and may be carriers, n=69). The stool microbiomes of each cohort were characterised using shotgun metagenomics, and bacterial diversity, composition, and function were compared.

We identified 4 bacterial species that were significantly lower in abundance in typhoid fever patients compared with household contacts (i.e. probably exposed), in two of the three participant populations (Bangladesh and Malawi). These bacteria may represent taxa that provide protection against development of clinical infection upon exposure to S. Typhi, and include the inflammation-associated species *Prevotella copri* clade A and *Haemophilus parainfluenzae*. Our functional analysis identified 28 specific metabolic gene clusters (MGCs) negatively associated with typhoid fever in Bangladesh and Malawi, including seven MGCs involved in SCFA metabolism. The putative protection provided by microbiome SCFA metabolism was supported by data from a controlled human infection model conducted in a UK population, in which participants who did not develop typhoid fever following ingestion of S. Typhi had higher abundance of a putative SCFA-metabolising MGC (q-value = 0.22).

79 This study identified the same protective associations between taxonomic and functional  
80 microbiota characteristics and non-susceptibility to typhoid fever across multiple human  
81 populations. Future research should explore the potential functional role of SCFAs and  
82 inflammation-associated bacteria in resistance to *S. Typhi* and other enteric infections.

## 83 Introduction

84 Typhoid fever, caused by invasive *Salmonella enterica* serovar Typhi (S. Typhi) infection,  
85 causes an estimated 10.9 million illnesses and 116,800 deaths per year disproportionately  
86 affecting people in South and Southeast Asia and sub-Saharan Africa (Stanaway et al. 2019;  
87 Meiring et al. 2023). The introduction of typhoid conjugate vaccines is expected to decrease the  
88 number of typhoid fever cases in these settings, along with improvements in water, sanitation  
89 and hygiene (WASH). However, the large burden of disease, the role of asymptomatic gall  
90 bladder carriage as a source of infection, and the fact that typhoid fever often impacts the most  
91 impoverished and marginalised communities, means that eradicating this infection will be  
92 difficult (Meiring et al. 2021; Patel et al. 2021; Steele et al. 2016).

93  
94 The human gut microbiota, a complex ecosystem comprising trillions of microbial cells, plays an  
95 indispensable role in shaping our overall health and susceptibility to diseases (Shreiner, Kao,  
96 and Young 2015). This densely populated microbial environment is not only pivotal in the  
97 processes of digestion and nutrient absorption but also intimately connected to our immune  
98 system, determining its responses to various stimuli (Belkaid and Hand 2014). As the nexus  
99 between the external environment and our internal physiology, the gut microbiome is a critical  
100 determinant of the outcome of gastrointestinal infectious disease exposures, via a phenomenon  
101 termed 'colonization resistance' (Stecher et al. 2007; Winter et al. 2010; Lopez et al. 2016;  
102 Libertucci and Young 2019). This protective effect arises from multifaceted interactions: direct  
103 competition for nutrients, production of antimicrobial compounds, and modulation of the host's  
104 innate and adaptive immune responses (Leshem, Liwinski, and Elinav 2020). Some of the  
105 earliest work on colonisation resistance showed that suppressing the gut microbiome of mice  
106 with antibiotics dramatically reduced the dose of *Salmonella* required to establish infection  
107 (Bohnhoff, Drake, and Miller 1954). Recent work has made great strides in understanding  
108 mechanisms by which *Salmonella* and the microbiome interact (Rogers, Tsois, and Bäumler  
109 2021). Short chain fatty acids (SCFAs) are important in interaction between the microbiota and  
110 *Salmonella*, reducing the availability of oxygen in the gut (Byndloss et al. 2017) and acidifying  
111 the cytosol of *Salmonella*, inhibiting growth (Jacobson et al. 2018). Despite well-established  
112 knowledge about the gut microbiome's function in preventing *Salmonella* infections and the  
113 established faecal-oral transmission pathway of S. Typhi, the precise influence of the gut  
114 microbiome on the outcome of S. Typhi exposure remains underexplored, complicated by the  
115 human host-specificity of S. Typhi.

116  
 117 While insights from animal studies of invasive infection with other *S. enterica* serovars can be  
 118 informative, detailed studies of the interaction between the human gut microbiome and *S. Typhi*  
 119 specifically are lacking. Controlled human infection model (CHIM) studies provide an  
 120 experimental system in which to interrogate infections in humans, complementing observational  
 121 studies of natural infections (Waddington et al. 2014; Gibani et al. 2020). Previous data  
 122 generated from this model revealed an association between typhoid fever susceptibility and the  
 123 presence of *Methanobrevibacter* in the gut microbiome (Zhang et al. 2018). Analysing natural  
 124 infections, Haak et al. determined that typhoid fever patients in Bangladesh had reduced  
 125 microbial diversity and fewer SCFA producers than healthy counterparts (Haak et al. 2020).  
 126 Better understanding of the causal relationships between the gut microbiome and typhoid fever  
 127 could lead to novel preventative mechanisms and diagnostics, as well as an improved  
 128 understanding of colonisation resistance to bacteria causing serious invasive diseases in high  
 129 burden settings.

130  
 131 To fill this knowledge gap, we sequenced the stool microbiome of 258 participants enrolled in  
 132 the STRATAA study, conducted in three diverse high typhoid fever burden settings in Asia and  
 133 Africa (Meiring et al. 2021). Signals that replicated in more than one study population were  
 134 further investigated in a UK-based CHIM cohort.

# Materials & Methods

## Participants and sample collection

Detailed methods for the STRATAA study have been published previously (Darton et al. 2017; Meiring et al. 2021). In brief, approximately 100,000 individuals were enumerated in a demographic census in three communities: Ndirande in Blantyre, Malawi; Lalitpur in Kathmandu, Nepal; and Mirpur in Dhaka, Bangladesh. Febrile patients, of any age, within the study populations were recruited via passive surveillance, and “acute typhoid fever” patients were defined as those with positive blood cultures yielding *S. Typhi*. When participants presented with fever, stool samples were collected where possible, preferably prior to antimicrobial use. Stool specimens were transferred to -80°C within 6 hours of collection. Data on antimicrobial use prior to their enrolment was recorded (Darton et al. 2017). Blood-culture confirmed typhoid fever patients were then followed up and stool samples were collected from their household contacts; asymptomatic stool culture-negative individuals were included in microbiome sequencing. High Vi-titre individuals were identified from a community-based serological survey of up to 8,500 age-stratified participants per site from the original demographic census. From the serological survey, samples were analysed for anti-Vi IgG antibody (Meiring et al. 2021). The participants at each site with the highest Vi responses were followed up and stool sample collected for microbiome analysis (Khanam et al. 2021). Stool cultures were *S. Typhi*-negative in all but one participant (Khanam et al. 2021), however it is known that carriers shed only intermittently and high-Vi individuals is an acceptable predictor for *S. Typhi* carriage (Robbins and Robbins 1984; Qureshi et al. 2024). For the microbiome sub-study, we randomly selected for sequencing stool samples from up to 40 participants from each site, from each of three groups: acute typhoid fever cases, household contacts, and serosurvey participants with high-Vi titres.

Research ethics committee approval for a joint study protocol across all three surveillance sites was obtained within each country and from the Oxford Tropical Research Ethics Committee (University of Oxford, Oxford, UK).

## DNA extraction and sequencing

DNA extraction from stool was done using the Fast-Prep 24 FastDNA Spin Kit (MP Biomedicals, CA, USA) according to manufacturer's instructions. DNA was sent to the Wellcome Sanger Institute (UK) for metagenomic sequencing using Illumina HiSeq 2500 or HiSeq 4000 to generate 150 bp paired end reads, yielding an average 14.8 million read pairs (standard deviation 2.3 million) per sample.

## Bioinformatics

Raw sequencing data was quality trimmed and adapters were removed using bbduk v38.96 with the parameters `ktrim=r k=23 mink=11 hdist=1 tbo tpe qtrim=r trimq=20 minlength=50`.

Sequence deriving from human DNA was removed by mapping to a human reference genome (GCF\_009914755.1) and the hostile tool (Constantinides, Hunt, and Crook 2023). Taxonomic profiling was carried out with metaphlan v4.0.6 with database version mpa\_vOct22\_CHOCOPhIAnSGB\_202212 (Blanco-Míguez et al. 2023).

We used the BiG-MAP program (Victória Pascal Andreu et al. 2021) (<https://github.com/medema-group/BiG-MAP>, commit e7b8042) to compare metagenomic readsets against a database of non-redundant metabolic gene clusters (MGCs) identified using gutSMASH (Victória Pascal Andreu et al. 2023) from a collection of reference genomes from the Culturable Genome Reference, the Human Microbiome Project and other Clostridia genomes (<https://zenodo.org/records/7252625#.ZFVTrexBz0r>). Each MGC is assigned to a species which is the species from which the representative sequence representing the cluster was obtained. BiG-MAP calculated the number of reads per kilobase per million reads (RPKM) for each metabolic gene cluster.

A sub-sample of 8.8 million reads was taken from each readset using the `sample` command of the seqtk tool (v1.3-r106). Sub-sampled reads were then analysed with Resistance Gene Identifier (RGI) v6.0.2 bwt command against the CARD v3.2.7 reference database (Alcock et al. 2023). Due to uncertainty regarding some CARD database classifications (e.g. OXA-1 was classified as a carbapenemase, a curation error which has subsequently been resolved), we used the drug class information for each gene from the NCBI AMR Reference Gene Database (refgene) v2023-08-08.2 (<https://www.ncbi.nlm.nih.gov/pathogens/refgene>). Only "Core" genes



from NCBI refgene were analysed; these genes are almost entirely mobilisable AMR determinants and do not include mutational resistance. Extended-spectrum beta-lactamases (ESBLs) were identified based on the gene product descriptions in NCBI refgene. Only genes with an Average Percent Coverage of 100% in the RGI analysis were included in further analysis. The number of reads mapped to each gene (RGI Completely Mapped Reads) was normalised by the length of the gene (RGI Reference Length) to generate a “Reads per kilobase of AMR gene” metric. There was no need to normalise for the number of reads, as all readsets had been sub-sampled to the same number of reads. RGI results were parsed and analysed using the scripts described in the Data Availability section of this manuscript. AMR genes identified in *S. Typhi* were obtained from (Argimón et al. 2021).

## Statistical analysis

Statistical analyses were done in R (v4.1.0). To quantify alpha diversity, Shannon's index was calculated using the `alpha.div` function in the `rbiom` package (v1.0.3), and ANOVA analysis carried out with the `aov` function (stats package, v4.1.0). The Bray-Curtis metric of beta diversity was calculated with the `vegdist` function of the R package `vegan` (v2.6.4). Principal co-ordinates analysis (PCoA) was carried out with the `cmdscale` function (package stats, v4.1.0), and statistics comparing beta diversity between participant groups (i.e. acute typhoid, household contacts, presumptive carrier) was carried out using a PERMANOVA approach implemented by the `adonis2` function of the `vegan` package (v2.6.4). Associations between taxa and phenotypes of interest (e.g. participant group) were explored using multivariable linear modelling implemented in the `maaslin2` function of the `maaslin2` R package (v1.6.0) (Mallick et al. 2021). Depending on the analysis, co-variables such as age, sex, antibiotic exposure, and sequencing run were included, as described. For `maaslin2` analyses, Benjamini-Hochberg correction was applied for multiple testing. For analyses of data from endemic cohorts a q-value threshold of 0.05 was used to identify significant associations, while for CHIM data analyses, due to small sample size, the default `maaslin2` q-value threshold of 0.25 was used.

## Controlled human infection model analysis

We used data from a *Salmonella* Typhi and Paratyphi A CHIM cohort to validate the associations identified in the endemic countries. Briefly, healthy adults aged 18-60 were recruited to be challenged with a single oral dose of either *S. Typhi* or *S. Paratyphi A* (Gibani et al. 2020). The primary endpoint for the model was a diagnosis of typhoid or paratyphoid fever,

defined as a temperature of  $\geq 38^{\circ}\text{C}$  persisting for  $\geq 12$  hours and/or *S. Typhi*/*Paratyphi A* bacteraemia in a sample collected  $\geq 72$  hours after oral challenge. Only data from participants who were being challenged for the first time were analysed here. Stool samples were taken from participants prior to challenge and stored at  $-80^{\circ}\text{C}$ . DNA extraction, sequencing and analyses was undertaken using the methods described above. The primary maaslin2 analyses for this cohort included only species or MGC classes that were significantly associated with participant group in at least two endemic country cohorts; a secondary analysis was carried out without this restriction. Analyses were done separately for participants challenged with either *S. Typhi* or *S. Paratyphi A*, in addition to a combined analysis including both pathogens.

# Results

## Description of population

Stool microbiome sequences were successfully generated for 258 participants from Bangladesh (n = 80), Malawi (n = 102), and Nepal (n = 76). Across the three populations, there were three participant groups; 92 patients with acute typhoid fever, 97 household contacts of acute typhoid cases, and 69 people with high anti-Vi titres. The baseline characteristics of participants are described in Table 1. Overall, acute typhoid fever patients were significantly younger than household contacts, while in Bangladesh and Malawi high-Vi titre participants were significantly older than household contacts (Supplementary Figure 1, Table 1). Overall, in Malawi, Bangladesh, and Nepal, 62%, 53% and 54% of participants were female, respectively (Table 1, Supplementary Figure 2). In Bangladesh and Malawi, sex distribution was similar between the participant groups, whereas in Nepal, 82% of household contacts and 67% of carriers were female, while only 24% of typhoid fever cases were female (Table 1, Supplementary Figure 2). Of the acute typhoid fever cases, 37.5%, 73.9% and 44.8% from Bangladesh, Malawi, and Nepal, respectively, reported antimicrobial use in the 2 weeks prior to stool sample collection.

252 *Table 1: Characteristics of participants in the microbiome sub-study of STRATAA surveillance*

|                      |                                 | <b>Bangladesh</b> | <b>Malawi</b> | <b>Nepal</b> |
|----------------------|---------------------------------|-------------------|---------------|--------------|
| <b>Acute typhoid</b> | N                               | 40                | 23            | 29           |
|                      | Median age, years (range)       | 6 (1-60)          | 10 (3-40)     | 17 (5-38)    |
|                      | Female (%)                      | 48%               | 61%           | 24%          |
|                      | Antibiotics in last 2 weeks (%) | 38%               | 74%           | 45%          |
| <b>Carrier</b>       | N                               | NA*               | 39            | 30           |
|                      | Median age                      | NA*               | 32            | 43.9         |
|                      | Female (%)                      | NA*               | 56%           | 67%          |
|                      | Antibiotics in last 2 weeks (%) | NA*               | NA†           | NA†          |
| <b>Control</b>       | N                               | 40                | 40            | 17           |
|                      | Median age, years (range)       | 29 (4-65)         | 24 (18-41)    | 35 (15-48)   |
|                      | Female (%)                      | 65%               | 65%           | 82%          |
|                      | Antibiotics in last 2 weeks (%) | NA†               | NA†           | NA†          |

253 \* Carriers from Bangladesh were not included in the analysis due to sample protocol differences

254 † Antibiotic usage in the two weeks previous was an exclusion criterion for carriers and  
 255 household contacts.

## 256 Acute typhoid fever patients compared with household contacts

257 First, we compared stool metagenomic profiles of acute typhoid patients with those of  
 258 household contacts, within each of the three study populations, to explore microbiome  
 259 signatures associated with typhoid fever. Participant group was not significantly associated with  
 260 differences in alpha diversity in any population (Supplementary Figure 3, Supplementary Table  
 261 1). Beta diversity varied significantly between typhoid fever patients and household contacts  
 262 across all sites (Figure 1, Supplementary Table 2). The proportion of beta diversity variance  
 263 explained by participant group was highest in Malawi ( $R^2 = 0.25$ , FDR = 0.01), followed by

264 Bangladesh ( $R^2 = 0.07$ , FDR = 0.01), Nepal ( $R^2 = 0.06$ , FDR = 0.01) and the combined analysis  
 265 ( $R^2 = 0.04$ , FDR = 0.01) (Figure 1, Supplementary Table 2, Supplementary Table 3,  
 266 Supplementary Table 4, Supplementary Table 5). Participant group explained the greatest beta  
 267 diversity variance of the factors investigated (which also included sex, age, and reported  
 268 antibiotic use) in a combined analysis of all three sites and for each site individually. In Malawi,  
 269 prior antibiotic usage and the interaction of prior antibiotic usage with age and sex were also  
 270 significantly associated with beta diversity, although these variables explained a lower  
 271 proportion of variance than participant group ( $R^2$  0.02-0.05, Supplementary Table 4). In Nepal,  
 272 sex was significantly associated with beta diversity and explained almost as much variance as  
 273 participant group ( $R^2 = 0.04$ , Supplementary Table 5), which was itself associated with sex at  
 274 this site. Firmicutes was the dominant phylum in typhoid fever patients and household contacts  
 275 at all three sites, followed by Bacteroidetes in Malawi and Nepal and Actinobacteria in  
 276 Bangladesh (Supplementary Figure 4, Supplementary Table 6).

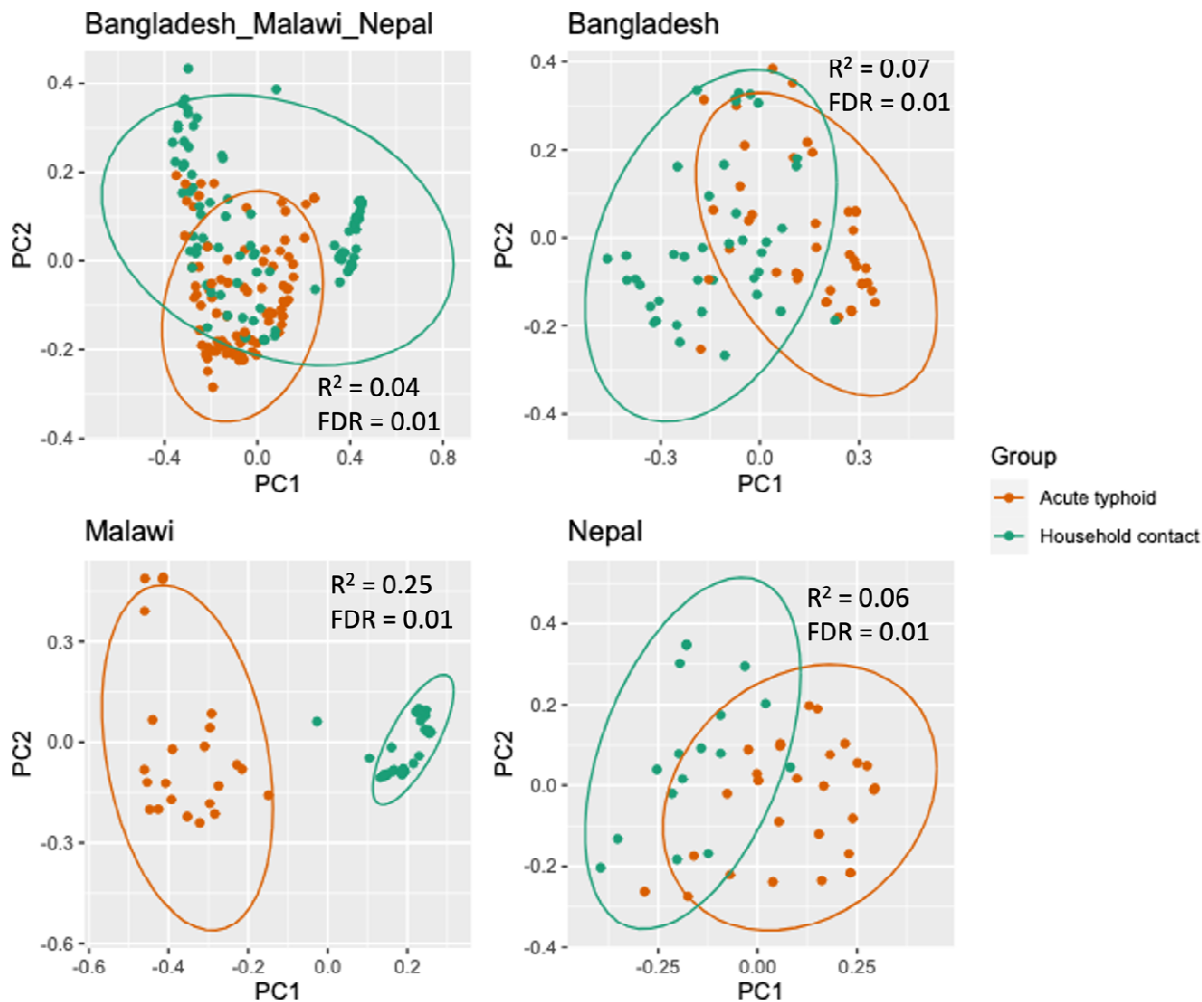

Figure 1: Principal co-ordinate analysis of the beta diversity between household contacts and typhoid fever participants across all three sites, and for each site individually. The proportion of variance explained ( $R^2$ ) and the Bonferroni corrected FDR from a PERMANOVA analysis including participant group, sex, and antibiotic usage are displayed on each plot. In the combined analysis, country of sampling was also included in the PERMANOVA analysis.

Maaslin2 analysis of taxonomic profiles identified 92, 23 and 0 species significantly associated with household contact vs typhoid fever participant groups in Malawi, Bangladesh, and Nepal, respectively (Figure 2, Supplementary Table 7, Supplementary Table 8). No taxa showed significant associations across all three sites; however, four showed consistent associations at two sites (Bangladesh and Malawi), all of which were negatively associated with typhoid fever (Figure 2). These four species were *Prevotella copri* clade A, *Haemophilus parainfluenzae*, *Clostridium* SGB6179 and a *Veillonellaceae* spp represented by a metagenome assembled genome, GGB4266\_SGB5809. Although there were differences in age between cases and household contacts at all sites, age was included as a covariate in maaslin2, and the associations with typhoid status were also evident within age groups where data from that age

group was available (Supplementary Figures 5-8). Of these four species, none were significantly associated with typhoid fever in Nepal or the CHIM; most samples from the CHIM did not contain any reads assigned to these species (Supplementary Table 29).

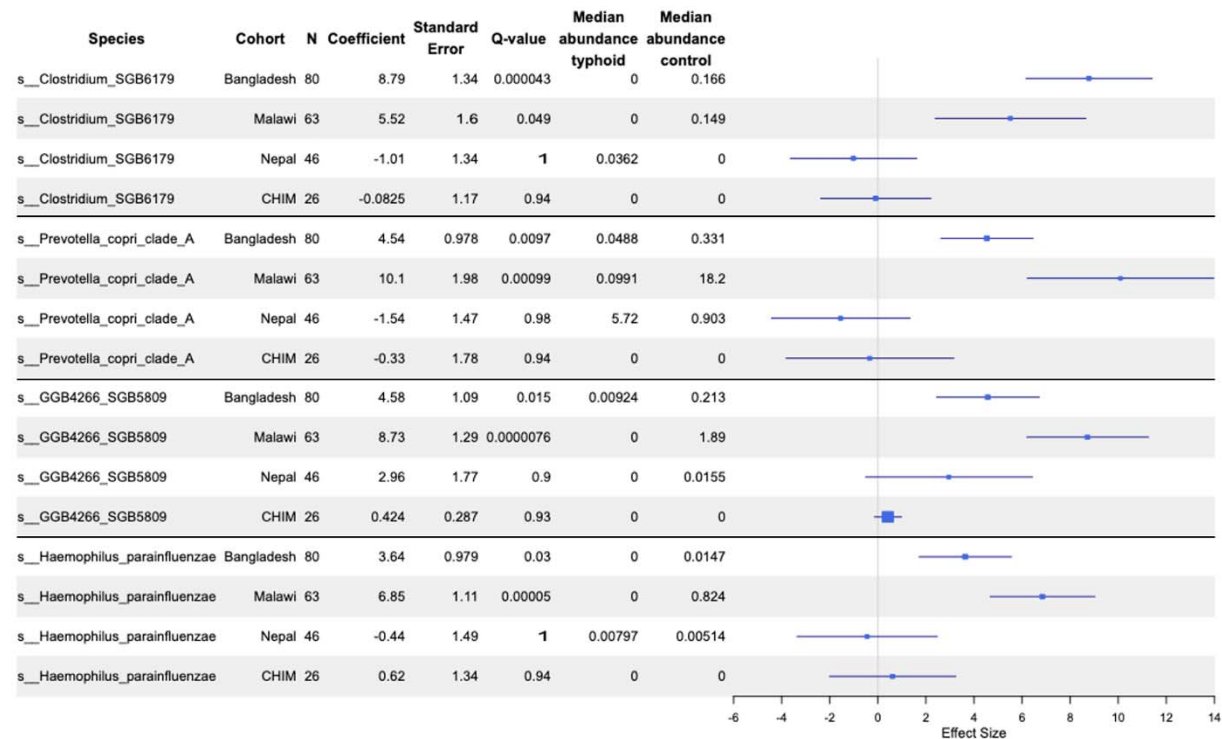

Figure 2: Forest plot of species that significantly differed between household contacts and typhoid fever participants in at least two endemic countries. Results from all three endemic countries and the CHIM cohort are shown for context. CHIM maaslin2 analysis only included species that were significantly associated in at least two of the endemic country sites. Species are labelled with their GTDB identifier, note that 's\_\_ GGB4266\_SGB5809' refers to a proposed novel genus/species of Veillonellaceae.

Some species were associated with typhoid fever at a single endemic country site. In Bangladesh, there were 19 species for which the relative abundance significantly differed between typhoid fever participants and household contacts, that didn't differ at any other site, or in the CHIM (Supplementary Table 7). Three species were negatively associated with typhoid fever (*Prevotella copri* clade C, *Romboutsia timonensis*, and *Ligilactobacillus ruminis*), while 16 species including 7 species of Actinomyces were positively associated with typhoid fever (Supplementary Table 7). In Malawi, 70 species were negatively associated with typhoid fever, including *Ruminococcus gnavus*, *Roseburia intestinalis*, *Roseburia inulinivorans*, and *Faecalibacterium prausnitzii* (Supplementary Table 8), while 18 species were positively associated with typhoid fever including 11 (61%) that are only in the Metaphlan4 database as metagenome assembled genomes (Supplementary Table 8).

314  
315 To complement our taxonomic analysis, we also carried out functional gene analysis. We  
316 explored two dimensions of variation in metabolic gene clusters (MGCs). First, we examined the  
317 distribution of specific MGCs, investigating participant group differences at a granular, sub-type  
318 level (e.g. a specific RNF complex from a strain of *Bacteroides ovatus*). Second, we compared  
319 the abundance of different MGC types between participant groups (e.g. all RNF complex  
320 MGCs). This dual approach enables us to capture both detailed and broad patterns of functional  
321 gene distribution within the microbiome.

322  
323 We identified 264 specific MGCs that significantly differed between typhoid fever patients and  
324 household contacts in the Malawi cohort, 126 in Bangladesh, and 2 in Nepal (Supplementary  
325 Table 24, Supplementary Table 25, Supplementary Table 26). Neither of the specific MGC  
326 associations identified in the Nepal data were replicated in the Malawi or Bangladesh cohorts.  
327 There were 28 specific MGCs significantly associated with typhoid fever in both Bangladesh and  
328 Malawi (summarised in Table 2, full information in Supplementary Table 9), all were negatively  
329 associated with typhoid fever in both settings. Six of these specific MGCs were linked to SCFA  
330 metabolism ('pyruvate2acetate.formate') and five to anaerobic metabolism ('Rnf complex'),  
331 associated with *Prevotella* and *Haemophilus* (see Figure 2, Supplementary Table 9). None of  
332 these 28 specific MGCs showed negative associations with acute typhoid fever in Nepal.

333



Table 2: Summary of the specific MGCs negatively associated with typhoid fever in both Bangladesh and Malawi, and the species of each MGC reference sequence. Full information in Supplementary Table 9.

| MGC_class                                 | n | Species                                                                                                                       |
|-------------------------------------------|---|-------------------------------------------------------------------------------------------------------------------------------|
| Pyruvate2acetate.formate                  | 6 | Haemophilus aegyptius, Haemophilus haemolyticus, Haemophilus parainfluenzae, Prevotella copri, Prevotella sp., Prevotella sp. |
| Rnf_complex                               | 5 | Haemophilus parainfluenzae, Prevotella copri, Prevotella sp., Prevotella sp., Prevotella sp.                                  |
| TPP_AA_metabolism                         | 4 | Clostridium celatum, Haemophilus pittmaniae, Haemophilus sputorum, Prevotella sp.                                             |
| Respiratory_glycerol                      | 2 | Aggregatibacter sp., Haemophilus parainfluenzae                                                                               |
| Arginine2putrescine.Putrescine2spermidine | 1 | Romboutsia sp.                                                                                                                |
| Formate_dehydrogenase                     | 1 | Haemophilus sp.                                                                                                               |
| Fumarate2succinate                        | 1 | Haemophilus sp.                                                                                                               |
| OD_eut_pdu_related.PFOR_II_pathway        | 1 | Paeniclostridium sordellii                                                                                                    |
| OD_fatty_acids                            | 1 | Dialister succinatiphilus                                                                                                     |
| Others_HGD_unassigned                     | 1 | Prevotella copri                                                                                                              |
| PFOR_II_pathway                           | 1 | Prevotella sp.                                                                                                                |
| TPP_AA_metabolism.Arginine2putrescine     | 1 | Haemophilus sp.                                                                                                               |
| TPP_fatty_acids                           | 1 | Prevotella copri                                                                                                              |
| porA                                      | 1 | Prevotella copri                                                                                                              |
| succinate2propionate                      | 1 | Dialister invisus                                                                                                             |

There were 31 MGC types that significantly differed between typhoid fever patients and household contacts in the Malawi cohort, 8 in Bangladesh, and 1 in Nepal (Figure 3, Supplementary Table 30). There was one MGC type that was negatively associated with typhoid fever in both Malawi and Bangladesh, “TPP\_AA\_metabolism.Arginine2putrescine”. Other MGC types that were negatively associated with typhoid fever in Malawi only included “acetate2butyrate.TPP\_fatty\_acids”, “TPP\_fatty\_acids.aminobutyrate2Butyrate”, “acrylate2propionate” and “Rnf\_complex.succinate2propionate”, while in Bangladesh, “Pyruvate2acetate” was negatively associated with typhoid fever. In Bangladesh, “Others\_HGD\_unassigned.Nitrate\_reductase” was positively associated with typhoid fever, while in Malawi, two MGC types were positively associated with typhoid fever – “Molybdopterin\_dependent\_oxidoreductase” and “pdu”. In Nepal, “Fumarate2succinate.fatty\_acids” was significantly negatively associated with typhoid fever.

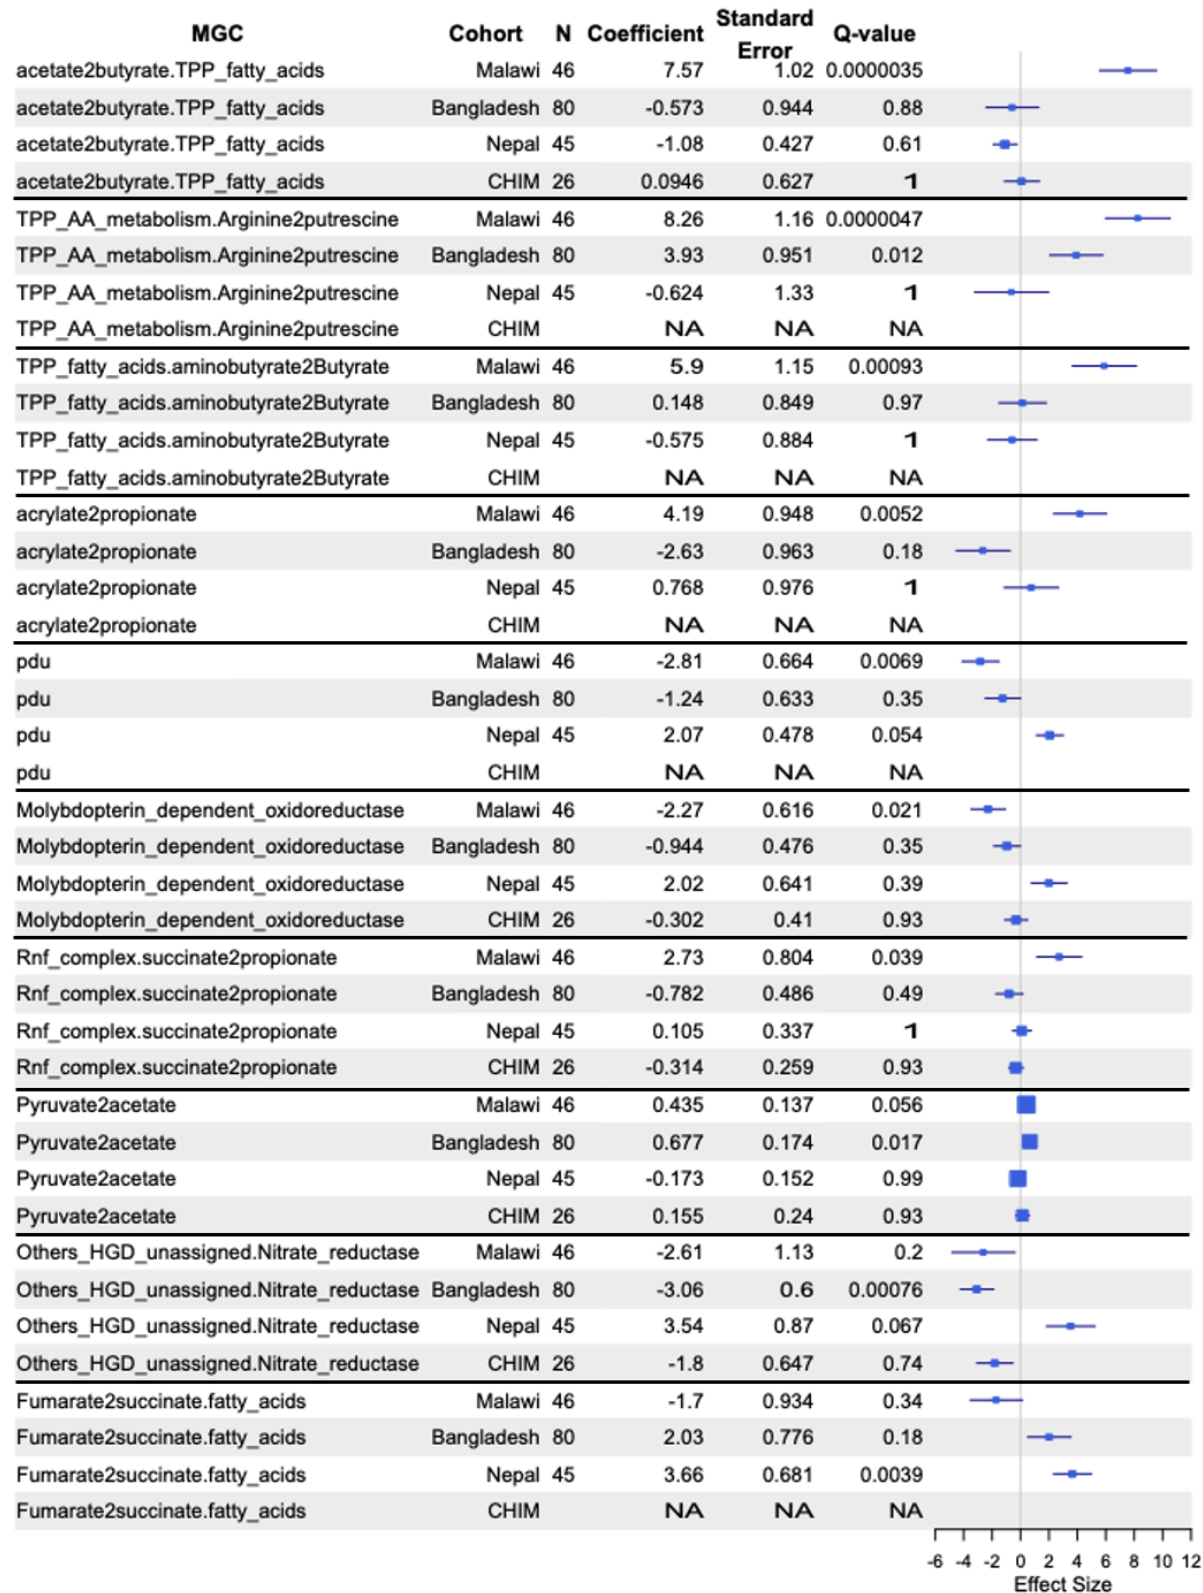

Figure 3: Forest plot of selected MGC types that differed significantly between household contacts and typhoid fever participants in at least one cohort. If an entry is NA, then there was insufficient of that MGC type identified in that cohort for maaslin analysis.

We hypothesised the taxa and MGCs that were found in higher abundance in asymptomatic household contacts of typhoid fever patients may be protective against developing disease upon exposure to *S. Typhi*. We sought to explore this more directly by assessing their abundance in CHIM participants who did or did not develop enteric fever upon challenge with typhoidal *Salmonella*, in a UK-based study (Gibani et al. 2020). We sequenced the microbiomes of 13 participants who were subsequently challenged with *S. Typhi* and 13 with *S. Paratyphi A*, of which 7 and 6 were diagnosed with enteric (typhoid or paratyphoid) fever, respectively (Supplementary Table 18). There was no significant difference ( $FDR < 0.05$ ) in alpha or beta diversity at baseline among CHIM participants by age at challenge, sex, or subsequent enteric fever diagnosis (Supplementary Table 19, Supplementary Table 20, Supplementary Figure 15). In an analysis including only the 28 MGC classes that were identified as negatively associated with typhoid in both Malawi and Bangladesh, two were also negatively associated with typhoid fever diagnosis in CHIM participants: an “Rnf\_complex.Glycine\_cleavage.succinate2propionate” MGC (coefficient = -3.4, q-value = 0.22) and an “Rnf\_complex” MGC (coefficient = -6.2, q-value = 0.22) (Supplementary Figure 16, full results available in Supplementary Table 23). None of the 28 MGC classes tested were associated with paratyphoid fever or a combination of both typhoid and paratyphoid fever. We investigated whether any of the species associated with typhoid in both Malawi and Bangladesh were associated with susceptibility to typhoid and/or paratyphoid fever in the CHIM cohort; none of them were (see Figure 2). All four species that were associated with typhoid fever in the endemic cohorts were not detected in the majority of samples from the CHIM (Supplementary Table 29).

## Analysis of high-Vi participants

High-Vi participants may represent asymptomatic gall-bladder carriers, or individuals with recent exposure or sub-clinical infection, either of whom may be a source in transmission. Detection of carriers is important for typhoid fever control, and will remain so even as disease incidence reduces due to vaccination and improvements in WASH, therefore we sought to explore the microbiome signature of this group. Samples from Bangladesh were not included in this analysis, as laboratory processing of the high Vi-titre participant samples from Bangladesh was not consistent with the other sites or participant groups. Using PERMANOVA, participant group was significantly associated with beta diversity in both countries (age and sex were not significant, Supplementary Table 11, Supplementary Table 12). Participant group explained greater variance in the Malawi cohort ( $R^2$  0.25,  $FDR=0.01$ ) than Nepal ( $R^2$  0.07,  $FDR=0.01$ ,

Supplementary Table 11, Supplementary Table 12,

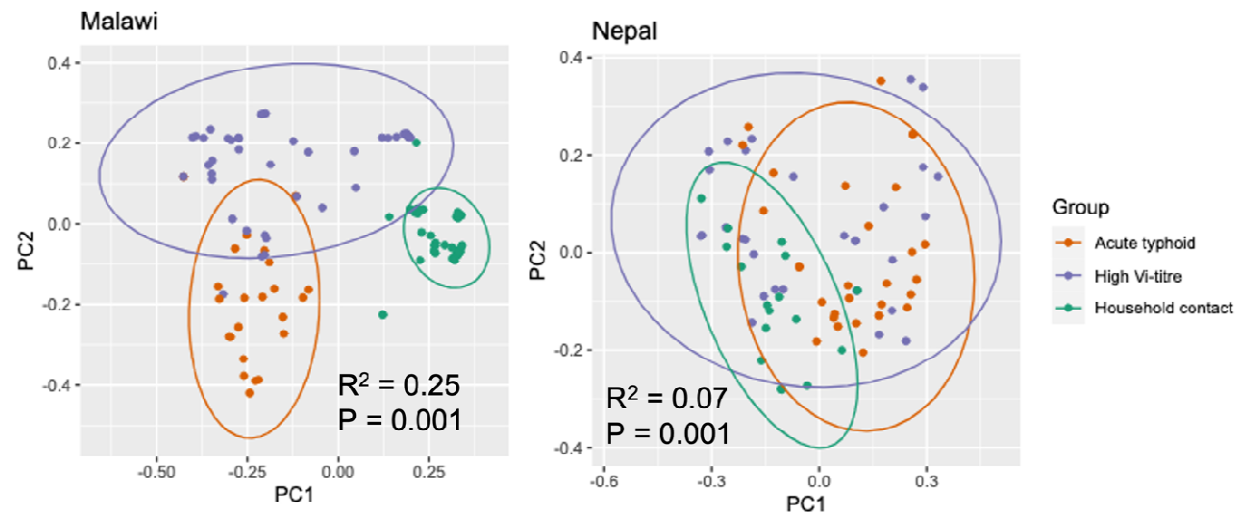

Supplementary Figure 10). The three participant groups have distinct beta-diversity signatures, with high-Vi individuals closer to typhoid patients than to household contacts (Figure 4). In the Malawi cohort, 125 bacterial species significantly differed between household contacts and high Vi-titre individuals (Supplementary Table 13), and 41 of these also significantly differed between household contacts and typhoid fever (Supplementary Table 21). These 41 species include *H. parainfluenzae*, *Blautia obeum*, and *Ruminococcus gnavus* (all less prevalent in acute typhoid and high-Vi individuals than household contacts, Supplementary Figure 11). Amongst Nepal samples, only one species significantly differed between household controls and high-Vi individuals (the Firmicutes SGB GGB9790 SGB15413). There were no species associated with household contacts compared with typhoid patients from Nepal, and SGB15413 did not differ between these groups (Supplementary Figure 12).



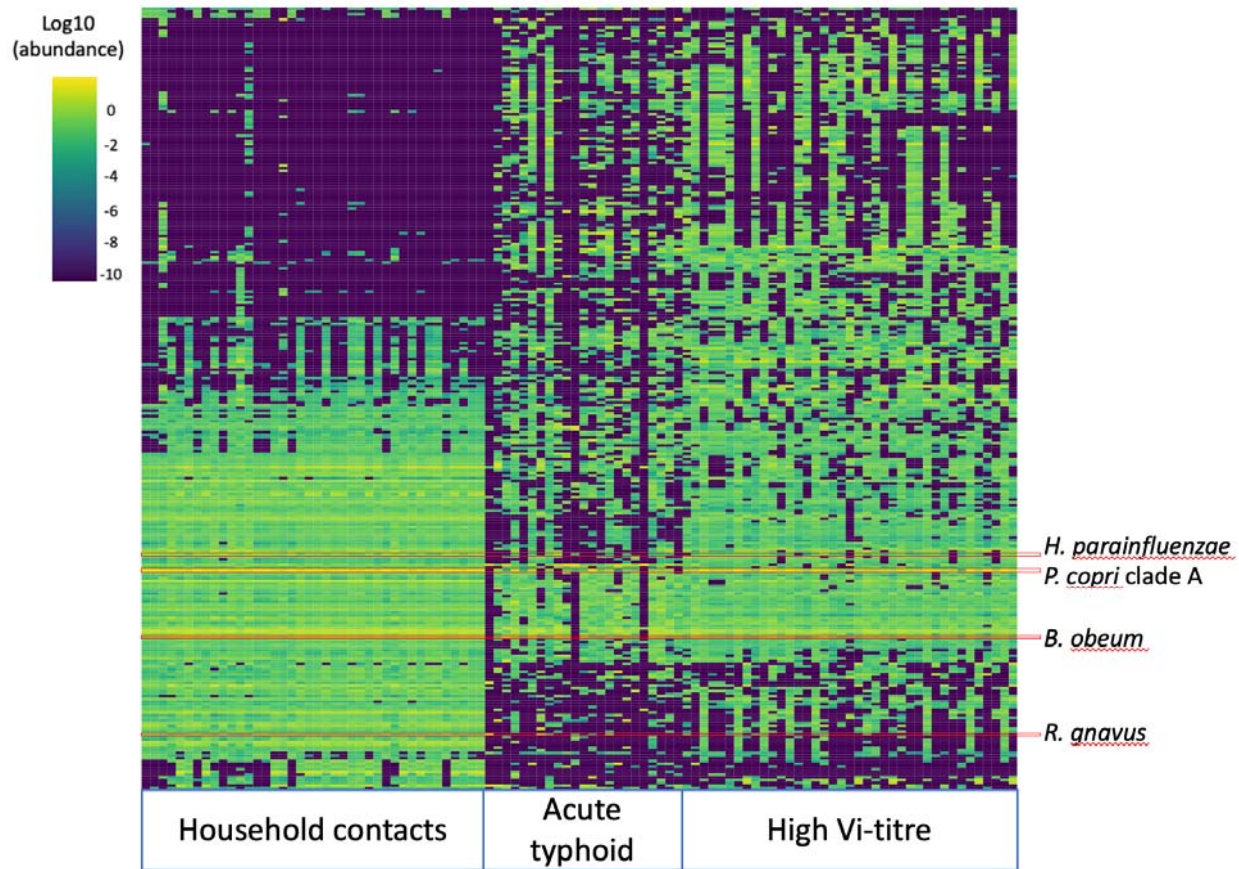

Figure 4: Heatmap of the abundance of the 400 most abundant species in household contacts, acute typhoid fever cases and high Vi-titre participants from Malawi. The columns are sorted by participant group, rows are sorted by hierarchical clustering across all samples.

The combined relative abundance of species only described as species genome bins (SGBs) was significantly lower in household contacts in Malawi (13.9%), compared with both typhoid fever patients (34.8%,  $P=0.012$ ) and high Vi-titre participants (47.1%,  $P=2.2 \times 10^{-16}$ ) in this setting (Supplementary Figure 13). The 50 SGBs with the highest summed abundance across all participant types in Malawi belonged to Firmicutes ( $n = 41$ ), Actinobacteria ( $n = 4$ ), Bacteroidetes ( $n = 3$ ), and Proteobacteria ( $n = 2$ ) (Supplementary Table 22). The most common families of the 50 most abundant SGBs were Oscillospiraceae ( $n = 13$ ), Lachnospiraceae ( $n = 7$ ), and Clostridiaceae ( $n = 4$ ) (Supplementary Table 22). In Nepal, high Vi-titre individuals had lower SGB relative abundance than acute typhoid cases (16.8% vs 29.9%,  $p = 0.03$ , Supplementary Figure 13).

## AMR genes

We recently reported AMR genotypes and phenotypes for *S. Typhi* isolated from acute typhoid fever cases in Bangladesh, Malawi, and Nepal (Dyson et al. 2024). Quinolone resistance was common in Bangladesh and Nepal but rare in Malawi; here we saw a similar pattern reflected in the gut microbiomes, with 2% quinolone resistance in Malawi, 30% in Bangladesh and 15% in Nepal (only mobile genetic element encoded quinolone determinants were analysed in the metagenomic data, Supplementary Table 14). Macrolide resistance was identified in one *S. Typhi* isolate from Bangladesh (0.6%) but not in Nepal or Malawi, here we found higher rates of macrolide resistance in microbiomes from individuals in Bangladesh (38%) and Nepal (35%) and lower in Malawi (11%). For the older drugs, *S. Typhi* isolates from Malawi had near-universal resistance to older sulfonamides and tetracyclines, and this was mirrored in high rates of resistance genes to these drugs in the microbiome samples (92% sulfonamides, 52% tetracycline). ESBLs were not detected in any *S. Typhi* isolates but were common in the microbiomes in Nepal (17%) and Bangladesh (9%); less so in Malawi (3%).

The proportion of samples with macrolide and trimethoprim resistance genes that have been observed in *S. Typhi* was significantly higher in participants with acute typhoid fever than in household contacts or high Vi-titre participants (macrolides = 42%, 14%, 22% respectively, Chi-square test p-value =  $4.4 \times 10^{-5}$ ; trimethoprim = 32%, 12%, 20% respectively, Chi-square test p-value = 0.005). There was no significant difference between participant types in the proportion of samples with resistance genes to any other drug classes. There was no statistically significant association between prior reported antibiotic usage and the number of AMR genes (Wilcoxon-rank sum P-value = 0.52) or the number of AMR gene classes (Wilcoxon Rank Sum P-value = 0.56) in typhoid fever patients across all sites (Supplementary Figure 14).

# Discussion

In this study, we examined the relationship between the stool microbiome and typhoid fever in three settings with endemic disease. Our analyses identified four microbial species (Figure 2), linked to anaerobic fermentation and SCFA metabolism (Table 2), that differentiated typhoid fever patients from household contacts in Bangladesh and Malawi. While these taxa were not found in the UK-based CHIM participants, a different MGC with a potential link to SCFA metabolism was higher in participants who were not susceptible to typhoid fever. Looking at the abundance of different MGC types (as opposed to specific MGCs) we found four types of MGC involved in SCFA metabolism that were negatively associated with typhoid fever in Malawi, and one in Bangladesh. Overall, our data support a protective role for SCFA-producing microbes, although with our study design it is not possible to deconvolute the impact of the microbiome on typhoid from the impact of typhoid on the microbiome.

The strengths of our study include a larger sample size than previous investigations of the interaction between typhoid fever and the microbiome, and a multi-site study design to increase generalisability. In contrast to previous studies of the microbiome and typhoid fever, we used shotgun metagenomics to characterise the gut flora, enabling in depth functional analysis and investigation of AMR genes. Notably, using the same methodology to analyse participants from different countries, most of the taxa we associated with typhoid fever differed between locations. This suggests that susceptibility to disease in different human populations may be modified by different species, which could hamper the generalisability of study findings between populations. It is notable that the most consistent microbial signature for disease susceptibility, identified across multiple study populations with small sample sizes, was a functional signature (specifically gene clusters associated with SCFA metabolism) rather than any specific taxa that perform this function.

One of the key limitations of our study is the lack of age and sex matching between the typhoid fever and household contact groups. The age and sex composition of the household controls reflects the occupants of the household during the daytime visits of the study workers. This discrepancy may introduce bias, as age and sex are known to influence the composition and function of the microbiome (Yatsunen et al. 2012). Although these variables were included in the statistical analyses, the lack of matching weakens our findings. Our use of a case-control study design in the endemic countries generated numerous hypotheses for subsequent

research, but it does not prove causal relationships. Additionally, we did not collect dietary information from participants. Diet is a major determinant of microbiome composition and function, and variations in dietary habits could confound the associations we observed (Bourdeau-Julien et al. 2023). Lastly, accounting for the effect of antibiotics on the microbiome in these cohorts presents a complex challenge, as it can significantly alter microbiome composition and potentially mask or mimic associations with typhoid fever. These challenges could largely be addressed using CHIM studies. Unfortunately, the only available CHIM data was from a different study population (in the UK) and with a small sample size (n=13 exposed to *S. Typhi*). Use of larger high-income country CHIMs and development of CHIMs in populations from settings with endemic disease would be helpful to better elucidate specific microbial signatures of protection.

Our use of shotgun metagenomics enabled us to also investigate the prevalence of AMR genes associated with resistance in *S. Typhi* across the three sites and participant groups. Macrolide and trimethoprim resistance genes were more common in acute typhoid cases compared with the household controls and high Vi-titre participants, highlighting that typhoid and associated antimicrobial usage imposes a selective pressure on the gut microbiome. This supports the idea that reducing disease via immunisation could reduce AMR beyond just *S. Typhi*. Higher levels of resistance to sulphonamides in Malawi likely reflects the common use of trimethoprim-sulfamethoxazole in HIV/AIDS programs (MacPherson et al. 2022), while higher microbiome prevalence of acquired ESBL and fluoroquinolone-resistance genes in Bangladesh than Malawi reflects the local epidemiology (e.g. recent studies of blood stream infections show that in Bangladesh, 72% and 75% were resistant to ciprofloxacin and third-generation cephalosporins respectively, compared with 31% and 30% in Malawi) (Musicha et al. 2017; Ahmed et al. 2017). The gut microbiome prevalence of resistance genes followed a similar pattern to the prevalence of resistance genes in *S. Typhi* observed from these sites (Dyson et al. 2024) for tetracycline, sulphonamides and quinolones, which likely reflects a shared evolutionary pressure on the isolates and the microbiome. The fact that non-ESBL beta-lactamases were identified in fewer metagenomes than ESBL beta-lactamases is because we only counted beta-lactamase encoding genes that are commonly found in *S. Typhi*.

Zhang et al. investigated 16S community profile and metatranscriptome features associated with susceptibility to typhoid fever in a CHIM (Zhang et al. 2018). One of their primary findings was that the archaeal genus *Methanobrevibacter* was enriched in people who were challenged



with *S. Typhi* but did not develop disease. In contrast, we only identified one association with a *Methanobrevibacter* species (*M. smithii*); a positive association with typhoid fever in Malawi. Furthermore, Zhang et al., identified that *Prevotella* was higher in people who developed typhoid fever, in contrast to our findings that it was negatively associated with typhoid fever in natural infections in endemic settings. One source of these discrepancies could be that Zhang et al. employed 16S, while we used shotgun metagenomics. Haak et al. observed more SCFA producing bacteria in, in both healthy control and febrile but non-typhoid fever participants in their study in Bangladesh compared with typhoid fever patients, and higher faecal load of SCFAs in controls than any febrile group (Haak et al. 2020), which corresponds well with our findings. It has also been shown that higher SCFAs in an acidic environment, and a strict anaerobic environment, can inhibit the growth of Enterobacteriaceae such as *Salmonella* via both direct and indirect mechanisms (Byndloss et al. 2017; Jacobson et al. 2018; Rogers, Tsolis, and Bäumler 2021). Recently, higher relative abundance of butyrate producing bacteria was associated with a reduced risk of hospitalisation for infections in a prospective study carried out in high income European countries (Kullberg et al. 2024). Two MGC types positively associated with typhoid fever in Malawi were molybdopterin dependent oxidoreductase and propanediol utilisation microcompartments, both of which enable growth in the inflamed gut (Faber et al. 2017; Zhu et al. 2018), suggesting that the microbiota of typhoid fever participants in Malawi may be in a state of dysbiosis. Arginine to putrescine was the only MGC type associated with health in both Bangladesh and Malawi, polyamines such as putrescine promote gut barrier integrity (Rao, Xiao, and Wang 2020), and can act as immunomodulators (Proietti et al. 2020).

Our findings from the STRATAA cohorts can be interpreted from two perspectives: i) the microbiota protecting against typhoid and, ii) typhoid causing microbiota changes. In contrast, the CHIM study design enables us to specifically assess whether microbiota present prior to pathogen exposure are associated with the outcome of that exposure (i.e. developing disease or not). Unfortunately, none of the taxa negatively associated with typhoid fever in the endemic settings were present in most of the CHIM participants, making it impossible to validate the association. It is well established that microbiome species composition differs between human populations, and particularly between those in high-income countries and low-and-middle-income countries (Gupta, Paul, and Dutta 2017). However, the metabolic gene cluster findings identified a recurring finding across the endemic settings and the CHIM; an association between species encoding SCFA metabolising genes and non-susceptibility to typhoid fever. While it

should be noted that the CHIM sample size was small, the fact that we identified a statistically significant difference supports the idea that the effect is quite strong. While our CHIM analyses lacked power, which is reflected in the high q-values obtained, the q-value for the SCFA MGC association was below the default maaslin2 threshold for significant findings.

Both *P. copri* and *H. parainfluenzae*, which were significantly lower in typhoid fever patients compared with household contacts in both Bangladesh and Malawi, are associated with increased gut inflammation (Sohn et al. 2023; Larsen 2017). *P. copri* is thought to increase Th17 inflammation (Godinez et al. 2011) while *H. parainfluenzae* stimulates intestinal (IFN- $\gamma$ )+ CD4+ T cells (Sohn et al. 2023), two mechanisms which play a key role in the response to *Salmonella* infections (Bao et al. 2000; Raffatellu et al. 2008). Increased inflammation could prime the host to respond more rapidly to pathogenic exposures, leading to enhanced control of infections. It is highly plausible that the gut microbiome plays a role in shaping the response of the immune system to pathogen challenge (Durack and Lynch 2019). This intriguing association needs further investigation, as the role of inflammation in enabling *Salmonella* to overcome colonisation resistance in mice is well established (Winter et al. 2010; Rogers, Tsolis, and Bäumler 2021). Among the species negatively associated with typhoid fever in Malawi only was *Ruminococcus gnavus*, which could influence susceptibility to enteric infection via IgA stimulation (Bunker et al. 2019), protects against enteropathogenic *E. coli* (McGrath et al. 2022), stimulates host tryptophan catabolism (Hoffmann et al. 2016) (*S. Typhi* requires tryptophan to grow in macrophages (Blohmke et al. 2016)), and produces secondary bile acids including chenodeoxycholic acid and iso-LCA that have anti-virulence effects on *Salmonella* (Lee et al. 2013; Yang, Stein, and Hang 2023).

Direction of causality cannot be determined from our study design, and a murine model of *Salmonella* Typhimurium infection recently reported shifts in gut microbiome composition, including a reduction in *Ruminococcaceae* taxa associated with acetate and butyrate production, following infection (Rogers et al. 2024). It is therefore plausible that the microbiome is modified in people suffering from typhoid fever. Gut disruption is known to alter the gut microbiome, for example, colorectal cancer patients from Morocco and Kenya had reduced *P. copri* in their gut, (Allali et al. 2018; Obuya et al. 2022). Potential triggers for microbiome alterations in typhoid fever could include antibiotic exposure, dietary changes or anorexia due to sickness, *S. Typhi*-induced malabsorption in the small intestine resulting in alterations to the nutrient composition within the large intestine, and the direct impact of fever on microbiome

composition as the increase in temperature could favour the growth of particular bacterial species (Chuttani, Jain, and Misra 1971; Huus and Ley 2021).

We cannot be certain about the exact cause of higher levels of anti-Vi antibodies in the high Vi-titre participants. Potential sources of immune stimulation include recent asymptomatic *S. Typhi* exposure/infection, exposure/infection with *Citrobacter freundii* which can be Vi-antigen positive, or chronic *S. Typhi* carriage. It is striking that there was a clear divergence in microbiota profile between these participants and acute cases and household contacts in Malawi, as this suggests that there is an interaction between the cause of the high Vi-titre and the gut microbiota. The 41 species that were significantly lower in both typhoid fever cases and high Vi-titre participants included the potentially immune-modulatory *H. parainfluenzae* (Sohn et al. 2023), the bile acid modifying *B. obeum* (formerly *Ruminococcus obeum*), and *R. gnavus*. Notably, it has been demonstrated that bile salt hydrolases encoded by *B. obeum* can inhibit *Vibrio cholerae* virulence gene activation and colonization (Alavi et al. 2020), and it is intriguing to hypothesise a similar mechanism might protect against *S. Typhi* gallbladder carriage and/or systemic infection. The influence of these species on susceptibility to *S. Typhi* infection, gallbladder carriage, and immune-reactivity should be investigated further.

## Conclusions

We found that typhoid fever patients in Malawi and Bangladesh display distinct microbiome signatures compared to household contacts, marked by lower abundance of SCFA producers and inflammation-related species. The negative association between SCFA producing genes and typhoid fever susceptibility was also replicated to some extent in our UK-based challenge study. The differences in species composition in the microbiota of these distinct cohorts make direct comparison and therefore validation difficult, highlighting the importance of establishing challenge studies in endemic settings to directly address important mechanistic questions.

## Data availability

The code used in the analysis of these data is available on github - [https://github.com/flashton2003/STRATAA\\_metagenomics](https://github.com/flashton2003/STRATAA_metagenomics). Sequencing data for this project are available at the European Nucleotide Archive, project accessions PRJEB14050 and PRJEB22175.

## Acknowledgements

We thank all the STRATAA participants for their willingness to take part in this research. We also acknowledge the sequencing and pathogen informatics teams at the Wellcome Sanger Institute for sequencing and data processing, and Zoe Dyson for assisting with sequence data transfer. We would like to acknowledge Ndaru Jambo, Andreas Bäuml, and Renee Tsois for helpful discussions. KA, SK, NRT, OS were funded by the Wellcome Trust (220540/Z/20/A). For the purpose of open access, the authors have applied a CC-BY public copyright licence to any author-accepted manuscript version arising from this submission. This research was funded by the Wellcome Trust (STRATAA grant number 106158/Z/14/Z, and core funding to the Wellcome Sanger Institute, grant number 206194) and the Bill & Melinda Gates Foundation (grant number OPP1141321). MAG, ACC, and PMA were supported by a research professorship (NIHR300039) from the National Institute for Health and Care Research, UK Department of Health and Social Care. GD is supported by the Health@InnoHK, Innovation Technology Commission Funding. MMG is supported by the NIHR Imperial Biomedical Research Centre and the Wellcome Trust (224029/Z/21/Z).

Members of the STRATAA study group are Christoph Blohmke, Yama Farooq, Jennifer Hill, Nhu Tran Hoang, Tikhala Makhaza Jere, Harrison Msuku, Tran Vu Thieu Nga, Rose Nkhata, Sadia Isfat Ara Rahman, Nazia Rahman, Neil J Saad, Trinh Van Tan, Deus Thindwa, Merryn Voysey, and Richard Wachepa. Their affiliations are: Malawi-Liverpool-Wellcome Programme, Blantyre, Malawi (Tikhala Makhaza Jere, Harrison Msuku, Rose Nkhata, Deus Thindwa, Richard Wachepa); International Centre for Diarrhoeal Disease Research, Dhaka, Bangladesh (Sadia Isfat Ara Rahman, Nazia Rahman); Oxford Vaccine Group, Department of Paediatrics, University of Oxford, and the NIHR Oxford Biomedical Research Centre, Oxford, UK (Christoph Blohmke, Yama Farooq, Jennifer Hill, Merryn Voysey); The Hospital for Tropical Diseases, Wellcome Trust Major Overseas Programme, Oxford University Clinical Research Unit, Ho Chi

Minh City, Viet Nam (Nhu Tran Hoang, Tran Vu Thieu Nga, Trinh Van Tan); Department of Epidemiology of Microbial Diseases and the Public Health Modeling Unit, Yale School of Public Health, Yale University, New Haven, CT, USA (Neil J Saad)

## Author contributions

Philip M. Ashton – conceptualisation, data curation, formal analysis, investigation, methodology, resources, software, visualisation, writing – original draft preparation.

Leonardos Mageiros - conceptualisation, data curation, formal analysis, investigation, methodology, software, writing – review and editing.

James Meiring - data curation, investigation, methodology, writing – review and editing.

Angeziwa Chunga Chirambo – data curation, investigation, writing – review and editing.

Farhana Khanam – data curation, investigation, writing – review and editing.

Happy Banda – investigation, writing – review and editing.

Abhilasha Karkey – investigation, supervision, writing – review and editing.

Sabina Dongol – data curation, investigation, writing – review and editing.

Lorena Preciado Llanes – conceptualisation, data curation, investigation, methodology, writing – review and editing.

Helena Thomaidis-Brears - investigation, methodology, writing – review and editing.

Malick Gibani – data curation, investigation, methodology, writing – review and editing.

Nazmul Hasan Rajib – investigation, writing – review and editing.

Nazia Rahman – investigation, writing – review and editing.

Prasanta Kumar Biswas – investigation, writing – review and editing.

Md Amirul Islam Bhuiyan – investigation, writing – review and editing.

Andrew Pollard – conceptualisation, funding acquisition, supervision, writing – review and editing.

Stephen Baker – funding acquisition, writing – review and editing.

Buddha Basnyat – funding acquisition, supervision, resources, writing – review and editing.

John D Clemens – funding acquisition, supervision, writing – review and editing.

Christiane Dolecek – funding acquisition, writing – review and editing.

Sarah J Dunstan – funding acquisition, writing – review and editing.

Gordon Dougan – conceptualisation, funding acquisition, methods, resources, writing – review and editing.  
Robert S. Heyderman – funding acquisition, writing – review and editing.  
Virginia E. Pitzer – funding acquisition, writing – review and editing.  
Firdausi Qadri – funding acquisition, supervision, resources, writing – review and editing.  
Melita A. Gordon – conceptualisation, funding acquisition, resources, supervision, writing – review and editing.  
Thomas C. Darton – conceptualisation, methodology, writing – review and editing.  
Kathryn E. Holt – conceptualisation, funding acquisition, resources, methodology, supervision, writing – original draft preparation, writing – review and editing.

## References

- Ahmed, Dilruba, Md Ausrafuggaman Nahid, Abdullah Bashar Sami, Farhana Halim, Nasrin Akter, Tuhin Sadique, Md Sohel Rana, Md Shahriar Bin Elahi, and Md Mahbubur Rahman. 2017. 'Bacterial Etiology of Bloodstream Infections and Antimicrobial Resistance in Dhaka, Bangladesh, 2005–2014'. *Antimicrobial Resistance & Infection Control* 6 (1): 2. <https://doi.org/10.1186/s13756-016-0162-z>.
- Alavi, Salma, Jonathan D. Mitchell, Jennifer Y. Cho, Rui Liu, John C. Macbeth, and Ansel Hsiao. 2020. 'Interpersonal Gut Microbiome Variation Drives Susceptibility and Resistance to Cholera Infection'. *Cell* 181 (7): 1533-1546.e13. <https://doi.org/10.1016/j.cell.2020.05.036>.
- Alcock, Brian P., William Huynh, Romeo Chalil, Keaton W. Smith, Amogelang R. Raphenya, Mateusz A. Wlodarski, Arman Edalatmand, et al. 2023. 'CARD 2023: Expanded Curation, Support for Machine Learning, and Resistome Prediction at the Comprehensive Antibiotic Resistance Database'. *Nucleic Acids Research* 51 (D1): D690–99. <https://doi.org/10.1093/nar/gkac920>.
- Allali, Imane, Noureddine Boukhatem, Leila Bouguenouch, Hanaa Hardi, H. Abir Boudouaya, M. Belen Cadenas, Karim Ouldin, Saaïd Amzazi, M. Andrea Azcarate-Peril, and Hassan Ghazal. 2018. 'Gut Microbiome of Moroccan Colorectal Cancer Patients'. *Medical Microbiology and Immunology* 207 (3): 211–25. <https://doi.org/10.1007/s00430-018-0542-5>.
- Argimón, Silvia, Corin A. Yeats, Richard J. Goater, Khalil Abudahab, Benjamin Taylor, Anthony Underwood, Leonor Sánchez-Busó, et al. 2021. 'A Global Resource for Genomic Predictions of Antimicrobial Resistance and Surveillance of Salmonella Typhi at Pathogenwatch'. *Nature Communications* 12 (1): 2879. <https://doi.org/10.1038/s41467-021-23091-2>.
- Bao, S, K W Beagley, M P France, J Shen, and A J Husband. 2000. 'Interferon-γ Plays a Critical Role in Intestinal Immunity against Salmonella Typhimurium Infection'. *Immunology* 99 (3): 464–72. <https://doi.org/10.1046/j.1365-2567.2000.00955.x>.
- Belkaid, Yasmine, and Timothy Hand. 2014. 'Role of the Microbiota in Immunity and Inflammation'. *Cell* 157 (1): 121–41. <https://doi.org/10.1016/j.cell.2014.03.011>.



- Blanco-Míguez, Aitor, Francesco Beghini, Fabio Cumbo, Lauren J. McIver, Kelsey N. Thompson, Moreno Zolfo, Paolo Manghi, et al. 2023. 'Extending and Improving Metagenomic Taxonomic Profiling with Uncharacterized Species Using MetaPhlAn 4'. *Nature Biotechnology* 41 (11): 1633–44. <https://doi.org/10.1038/s41587-023-01688-w>.
- Blohmke, Christoph J., Thomas C. Darton, Claire Jones, Nicolas M. Suarez, Claire S. Waddington, Brian Angus, Liqing Zhou, et al. 2016. 'Interferon-Driven Alterations of the Host's Amino Acid Metabolism in the Pathogenesis of Typhoid Fever'. *Journal of Experimental Medicine* 213 (6): 1061–77. <https://doi.org/10.1084/jem.20151025>.
- Bohnhoff, Marjorie, Barbara L. Drake, and C. Phillip Miller. 1954. 'Effect of Streptomycin on Susceptibility of Intestinal Tract to Experimental Salmonella Infection.' *Proceedings of the Society for Experimental Biology and Medicine* 86 (1): 132–37. <https://doi.org/10.3181/00379727-86-21030>.
- Bourdeau-Julien, Isabelle, Sophie Castonguay-Paradis, Gabrielle Rochefort, Julie Perron, Benoît Lamarche, Nicolas Flamand, Vincenzo Di Marzo, Alain Veilleux, and Frédéric Raymond. 2023. 'The Diet Rapidly and Differentially Affects the Gut Microbiota and Host Lipid Mediators in a Healthy Population'. *Microbiome* 11 (1): 26. <https://doi.org/10.1186/s40168-023-01469-2>.
- Bunker, Jeffrey J., Christoph Drees, Andrea R. Watson, Catherine H. Plunkett, Cathryn R. Nagler, Olaf Schneewind, A. Murat Eren, and Albert Bendelac. 2019. 'B Cell Superantigens in the Human Intestinal Microbiota'. *Science Translational Medicine* 11 (507): eaau9356. <https://doi.org/10.1126/scitranslmed.aau9356>.
- Byndloss, Mariana X., Erin E. Olsan, Fabian Rivera-Chávez, Connor R. Tiffany, Stephanie A. Cevallos, Kristen L. Lokken, Teresa P. Torres, et al. 2017. 'Microbiota-Activated PPAR-γ Signaling Inhibits Dysbiotic Enterobacteriaceae Expansion'. *Science* 357 (6351): 570–75. <https://doi.org/10.1126/science.aam9949>.
- Chuttani, H. K., K. Jain, and R. C. Misra. 1971. 'Small Bowel in Typhoid Fever'. *Gut* 12 (9): 709–12.
- Constantinides, Bede, Martin Hunt, and Derrick W Crook. 2023. 'Hostile: Accurate Decontamination of Microbial Host Sequences'. *Bioinformatics* 39 (12): btad728. <https://doi.org/10.1093/bioinformatics/btad728>.
- Darton, Thomas C, James E Meiring, Susan Tonks, Md Arifuzzaman Khan, Farhana Khanam, Mila Shakya, Deus Thindwa, et al. 2017. 'The STRATAA Study Protocol: A Programme to Assess the Burden of Enteric Fever in Bangladesh, Malawi and Nepal Using Prospective Population Census, Passive Surveillance, Serological Studies and Healthcare Utilisation Surveys'. *BMJ Open* 7 (6): e016283. <https://doi.org/10.1136/bmjopen-2017-016283>.
- Durack, Juliana, and Susan V. Lynch. 2019. 'The Gut Microbiome: Relationships with Disease and Opportunities for Therapy'. *The Journal of Experimental Medicine* 216 (1): 20–40. <https://doi.org/10.1084/jem.20180448>.
- Dyson, Zoe A., Philip M. Ashton, Farhana Khanam, Angeziwa Chunga Chirambo, Mila Shakya, James E. Meiring, Susan Tonks, et al. 2024. 'Pathogen Diversity and Antimicrobial Resistance Transmission of Salmonella Enterica Serovars Typhi and Paratyphi A in Bangladesh, Nepal, and Malawi: A Genomic Epidemiological Study'. *The Lancet Microbe* 0 (0). [https://doi.org/10.1016/S2666-5247\(24\)00047-8](https://doi.org/10.1016/S2666-5247(24)00047-8).
- Faber, Franziska, Parameth Thiennimitr, Luisella Spiga, Mariana X. Byndloss, Yael Litvak, Sara Lawhon, Helene L. Andrews-Polymenis, Sebastian E. Winter, and Andreas J. Bäuml. 2017. 'Respiration of Microbiota-Derived 1,2-Propanediol Drives Salmonella Expansion during Colitis'. *PLoS Pathogens* 13 (1): e1006129. <https://doi.org/10.1371/journal.ppat.1006129>.
- Gibani, Malick M., Celina Jin, Sonu Shrestha, Maria Moore, Lily Norman, Merryn Voysey, Elizabeth Jones, et al. 2020. 'Homologous and Heterologous Re-Challenge with

- Salmonella Typhi and Salmonella Paratyphi A in a Randomised Controlled Human Infection Model'. *PLoS Neglected Tropical Diseases* 14 (10): e0008783. <https://doi.org/10.1371/journal.pntd.0008783>.
- Godinez, Ivan, A. Marijke Keestra, Alanna Spees, and Andreas J. Bäumlér. 2011. 'The IL-23 Axis in Salmonella Gastroenteritis'. *Cellular Microbiology* 13 (11): 1639–47. <https://doi.org/10.1111/j.1462-5822.2011.01637.x>.
- Gupta, Vinod K., Sandip Paul, and Chitra Dutta. 2017. 'Geography, Ethnicity or Subsistence-Specific Variations in Human Microbiome Composition and Diversity'. *Frontiers in Microbiology* 8 (June):1162. <https://doi.org/10.3389/fmicb.2017.01162>.
- Haak, Bastiaan W, Hanna K de Jong, Sarantos Kostidis, Martin Giera, Rapeephan R Maude, Rasheda Samad, Lalith Wijedoru, et al. 2020. 'Altered Patterns of Compositional and Functional Disruption of the Gut Microbiota in Typhoid Fever and Nontyphoidal Febrile Illness'. *Open Forum Infectious Diseases* 7 (7). <https://doi.org/10.1093/ofid/ofaa251>.
- Hoffmann, Thomas W., Hang-Phuong Pham, Chantal Bridonneau, Camille Aubry, Bruno Lamas, Camille Martin-Gallausiaux, Marco Moroldo, et al. 2016. 'Microorganisms Linked to Inflammatory Bowel Disease-Associated Dysbiosis Differentially Impact Host Physiology in Gnotobiotic Mice'. *The ISME Journal* 10 (2): 460–77. <https://doi.org/10.1038/ismej.2015.127>.
- Huus, Kelsey E., and Ruth E. Ley. 2021. 'Blowing Hot and Cold: Body Temperature and the Microbiome'. *mSystems* 6 (5): 10.1128/msystems.00707-21. <https://doi.org/10.1128/msystems.00707-21>.
- Jacobson, Amanda, Lilian Lam, Manohary Rajendram, Fiona Tamburini, Jared Honeycutt, Trung Pham, Will Van Treuren, et al. 2018. 'A Gut Commensal-Produced Metabolite Mediates Colonization Resistance to Salmonella Infection'. *Cell Host & Microbe* 24 (2): 296-307.e7. <https://doi.org/10.1016/j.chom.2018.07.002>.
- Khanam, Farhana, Thomas C. Darton, James E. Meiring, Protup Kumer Sarker, Prasanta Kumar Biswas, Md Amirul Islam Bhuiyan, Nazmul Hasan Rajib, et al. 2021. 'Salmonella Typhi Stool Shedding by Patients With Enteric Fever and Asymptomatic Chronic Carriers in an Endemic Urban Setting'. *The Journal of Infectious Diseases* 224 (12 Suppl 2): S759–63. <https://doi.org/10.1093/infdis/jiab476>.
- Kullberg, Robert F J, Irina Wikki, Bastiaan W Haak, Anni Kauko, Henrike Galenkamp, Hessel Peters-Sengers, Joe M Butler, et al. 2024. 'Association between Butyrate-Producing Gut Bacteria and the Risk of Infectious Disease Hospitalisation: Results from Two Observational, Population-Based Microbiome Studies'. *The Lancet Microbe* 5 (9): 100864. [https://doi.org/10.1016/S2666-5247\(24\)00079-X](https://doi.org/10.1016/S2666-5247(24)00079-X).
- Larsen, Jeppe Madura. 2017. 'The Immune Response to Prevotella Bacteria in Chronic Inflammatory Disease'. *Immunology* 151 (4): 363–74. <https://doi.org/10.1111/imm.12760>.
- Lee, Ja-Young, Hisashi Arai, Yusuke Nakamura, Satoru Fukiya, Masaru Wada, and Atsushi Yokota. 2013. 'Contribution of the 7β-Hydroxysteroid Dehydrogenase from Ruminococcus Gnavus N53 to Ursodeoxycholic Acid Formation in the Human Colon'. *Journal of Lipid Research* 54 (11): 3062–69. <https://doi.org/10.1194/jlr.M039834>.
- Leshem, Avner, Timur Liwinski, and Eran Elinav. 2020. 'Immune-Microbiota Interplay and Colonization Resistance in Infection'. *Molecular Cell* 78 (4): 597–613. <https://doi.org/10.1016/j.molcel.2020.03.001>.
- Libertucci, Josie, and Vincent B. Young. 2019. 'The Role of the Microbiota in Infectious Diseases'. *Nature Microbiology* 4 (1): 35–45. <https://doi.org/10.1038/s41564-018-0278-4>.
- Lopez, Christopher A., Brittany M. Miller, Fabian Rivera-Chávez, Eric M. Velazquez, Mariana X. Byndloss, Alfredo Chávez-Arroyo, Kristen L. Lokken, Renée M. Tsois, Sebastian E. Winter, and Andreas J. Bäumlér. 2016. 'Virulence Factors Enhance Citrobacter Rodentium Expansion through Aerobic Respiration'. *Science (New York, N. Y.)* 353 (6305): 1249–53. <https://doi.org/10.1126/science.aag3042>.



- MacPherson, Eleanor E., Joanna Reynolds, Esnart Sanudi, Alexander Nkaombe, John Mankhomwa, Justin Dixon, and Clare I. R. Chandler. 2022. 'Understanding Antimicrobial Use in Subsistence Farmers in Chikwawa District Malawi, Implications for Public Awareness Campaigns'. *PLOS Global Public Health* 2 (6): e0000314. <https://doi.org/10.1371/journal.pgph.0000314>.
- Mallick, Himel, Ali Rahnavard, Lauren J. McIver, Siyuan Ma, Yancong Zhang, Long H. Nguyen, Timothy L. Tickle, et al. 2021. 'Multivariable Association Discovery in Population-Scale Meta-Omics Studies'. *PLOS Computational Biology* 17 (11): e1009442. <https://doi.org/10.1371/journal.pcbi.1009442>.
- McGrath, Conor J., Edgaras Laveckis, Andrew Bell, Emmanuelle Crost, Nathalie Juge, and Stephanie Schüller. 2022. 'Development of a Novel Human Intestinal Model to Elucidate the Effect of Anaerobic Commensals on Escherichia Coli Infection'. *Disease Models & Mechanisms* 15 (4): dmm049365. <https://doi.org/10.1242/dmm.049365>.
- Meiring, James E., Farhana Khanam, Buddha Basnyat, Richelle C. Charles, John A. Crump, Frederic Debellut, Kathryn E. Holt, et al. 2023. 'Typhoid Fever'. *Nature Reviews Disease Primers* 9 (1): 1–18. <https://doi.org/10.1038/s41572-023-00480-z>.
- Meiring, James E., Mila Shakya, Farhana Khanam, Merryn Voysey, Maile T. Phillips, Susan Tonks, Deus Thindwa, et al. 2021. 'Burden of Enteric Fever at Three Urban Sites in Africa and Asia: A Multicentre Population-Based Study'. *The Lancet Global Health* 9 (12): e1688–96. [https://doi.org/10.1016/S2214-109X\(21\)00370-3](https://doi.org/10.1016/S2214-109X(21)00370-3).
- Musicha, Patrick, Jennifer E Cornick, Naor Bar-Zeev, Neil French, Clemens Masesa, Brigitte Denis, Neil Kennedy, et al. 2017. 'Trends in Antimicrobial Resistance in Bloodstream Infection Isolates at a Large Urban Hospital in Malawi (1998–2016): A Surveillance Study'. *The Lancet Infectious Diseases* 17 (10): 1042–52. [https://doi.org/10.1016/S1473-3099\(17\)30394-8](https://doi.org/10.1016/S1473-3099(17)30394-8).
- Obuya, Sarah, Amr Elkholy, Nagavardhini Avuthu, Michael Behring, Prachi Bajpai, Sumit Agarwal, Hyung-Gyoon Kim, et al. 2022. 'A Signature of Prevotella Copri and Faecalibacterium Prausnitzii Depletion, and a Link with Bacterial Glutamate Degradation in the Kenyan Colorectal Cancer Patients'. *Journal of Gastrointestinal Oncology* 13 (5): 2282–92. <https://doi.org/10.21037/jgo-22-116>.
- Pascal Andreu, Victória, Hannah E. Augustijn, Koen van den Berg, Justin J. J. van der Hooft, Michael A. Fischbach, and Marnix H. Medema. 2021. 'BiG-MAP: An Automated Pipeline To Profile Metabolic Gene Cluster Abundance and Expression in Microbiomes'. *mSystems* 6 (5): e00937-21. <https://doi.org/10.1128/mSystems.00937-21>.
- Pascal Andreu, Victòria, Hannah E. Augustijn, Lianmin Chen, Alexandra Zhernakova, Jingyuan Fu, Michael A. Fischbach, Dylan Dodd, and Marnix H. Medema. 2023. 'gutSMASH Predicts Specialized Primary Metabolic Pathways from the Human Gut Microbiota'. *Nature Biotechnology* 41 (10): 1416–23. <https://doi.org/10.1038/s41587-023-01675-1>.
- Patel, Priyanka D., Pratiksha Patel, Yuanyuan Liang, James E. Meiring, Theresa Misiri, Felistas Mwakiseghile, J. Kathleen Tracy, et al. 2021. 'Safety and Efficacy of a Typhoid Conjugate Vaccine in Malawian Children'. *New England Journal of Medicine* 385 (12): 1104–15. <https://doi.org/10.1056/NEJMoa2035916>.
- Proietti, Elisa, Sofia Rossini, Ursula Grohmann, and Giada Mondanelli. 2020. 'Polyamines and Kynurenines at the Intersection of Immune Modulation'. *Trends in Immunology* 41 (11): 1037–50. <https://doi.org/10.1016/j.it.2020.09.007>.
- Qureshi, Sonia, Noshi Maria, Tabish Chawla, Junaid Iqbal, Abdul Momin Kazi, Mehreen Adnan, Aneeta Hotwani, et al. 2024. 'The Frequency and Associated Factors of Typhoid Carriage in Patients Undergoing Cholecystectomy for Gallbladder Disease in Pakistan: A Cross-Sectional Study'. *PLoS Neglected Tropical Diseases* 18 (6): e0011775. <https://doi.org/10.1371/journal.pntd.0011775>.

Raffatellu, Manuela, Renato L. Santos, David E. Verhoeven, Michael D. George, R. Paul Wilson, Sebastian E. Winter, Ivan Godinez, et al. 2008. 'Simian Immunodeficiency Virus-Induced Mucosal Interleukin-17 Deficiency Promotes Salmonella Dissemination from the Gut'. *Nature Medicine* 14 (4): 421–28. <https://doi.org/10.1038/nm1743>.

Rao, Jaladanki N., Lan Xiao, and Jian-Ying Wang. 2020. 'Polyamines in Gut Epithelial Renewal and Barrier Function'. *Physiology* 35 (5): 328–37. <https://doi.org/10.1152/physiol.00011.2020>.

Robbins, J. D., and J. B. Robbins. 1984. 'Reexamination of the Protective Role of the Capsular Polysaccharide (Vi Antigen) of Salmonella Typhi'. *The Journal of Infectious Diseases* 150 (3): 436–49. <https://doi.org/10.1093/infdis/150.3.436>.

Rogers, Andrew W. L., Lauren C. Radlinski, Henry Nguyen, Connor R. Tiffany, Thaynara Parente Carvalho, Hugo L. P. Masson, Michael L. Goodson, et al. 2024. 'Salmonella Re-Engineers the Intestinal Environment to Break Colonization Resistance in the Presence of a Compositionally Intact Microbiota'. *Cell Host & Microbe* 32 (10): 1774-1786.e9. <https://doi.org/10.1016/j.chom.2024.07.025>.

Rogers, Andrew W. L., Renée M. Tsois, and Andreas J. Bäumler. 2021. 'Salmonella versus the Microbiome'. *Microbiology and Molecular Biology Reviews: MMBR* 85 (1): e00027-19. <https://doi.org/10.1128/MMBR.00027-19>.

Shreiner, Andrew B., John Y. Kao, and Vincent B. Young. 2015. 'The Gut Microbiome in Health and in Disease'. *Current Opinion in Gastroenterology* 31 (1): 69–75. <https://doi.org/10.1097/MOG.0000000000000139>.

Sohn, Jiho, Lu Li, Lixia Zhang, Robert J. Genco, Karen L. Falkner, Hervé Tettelin, Aryn M. Rowsam, et al. 2023. 'Periodontal Disease Is Associated with Increased Gut Colonization of Pathogenic Haemophilus parainfluenzae in Patients with Crohn's Disease'. *Cell Reports* 42 (2): 112120. <https://doi.org/10.1016/j.celrep.2023.112120>.

Stanaway, Jeffrey D., Robert C. Reiner, Brigitte F. Blacker, Ellen M. Goldberg, Ibrahim A. Khalil, Christopher E. Troeger, Jason R. Andrews, et al. 2019. 'The Global Burden of Typhoid and Paratyphoid Fevers: A Systematic Analysis for the Global Burden of Disease Study 2017'. *The Lancet Infectious Diseases* 19 (4): 369–81. [https://doi.org/10.1016/S1473-3099\(18\)30685-6](https://doi.org/10.1016/S1473-3099(18)30685-6).

Stecher, Bärbel, Riccardo Robbiani, Alan W. Walker, Astrid M. Westendorf, Manja Barthel, Marcus Kremer, Samuel Chaffron, et al. 2007. 'Salmonella Enterica Serovar Typhimurium Exploits Inflammation to Compete with the Intestinal Microbiota'. *PLOS Biology* 5 (10): e244. <https://doi.org/10.1371/journal.pbio.0050244>.

Steele, A. Duncan, Deborah C. Hay Burgess, Zoey Diaz, Megan E. Carey, and Anita K. M. Zaidi. 2016. 'Challenges and Opportunities for Typhoid Fever Control: A Call for Coordinated Action'. *Clinical Infectious Diseases: An Official Publication of the Infectious Diseases Society of America* 62 (Suppl 1): S4–8. <https://doi.org/10.1093/cid/civ976>.

Waddington, Claire S., Thomas C. Darton, Claire Jones, Kathryn Haworth, Anna Peters, Tessa John, Ben A. V. Thompson, et al. 2014. 'An Outpatient, Ambulant-Design, Controlled Human Infection Model Using Escalating Doses of Salmonella Typhi Challenge Delivered in Sodium Bicarbonate Solution'. *Clinical Infectious Diseases* 58 (9): 1230–40. <https://doi.org/10.1093/cid/ciu078>.

Winter, Sebastian E., Parameth Thiennimitr, Maria G. Winter, Brian P. Butler, Douglas L. Huseby, Robert W. Crawford, Joseph M. Russell, et al. 2010. 'Gut Inflammation Provides a Respiratory Electron Acceptor for Salmonella'. *Nature* 467 (7314): 426–29. <https://doi.org/10.1038/nature09415>.

Yang, Xinglin, Kathryn R. Stein, and Howard C. Hang. 2023. 'Anti-Infective Bile Acids Bind and Inactivate a Salmonella Virulence Regulator'. *Nature Chemical Biology* 19 (1): 91–100. <https://doi.org/10.1038/s41589-022-01122-3>.

- Yatsunenkov, Tanya, Federico E. Rey, Mark J. Manary, Indi Trehan, Maria Gloria Dominguez-Bello, Monica Contreras, Magda Magris, et al. 2012. 'Human Gut Microbiome Viewed across Age and Geography'. *Nature* 486 (7402): 222–27. <https://doi.org/10.1038/nature11053>.
- Zhang, Yan, Arthur Brady, Cheron Jones, Yang Song, Thomas C. Darton, Claire Jones, Christoph J. Blohmke, et al. 2018. 'Compositional and Functional Differences in the Human Gut Microbiome Correlate with Clinical Outcome Following Infection with Wild-Type Salmonella Enterica Serovar Typhi'. *mBio* 9 (3): e00686-18. <https://doi.org/10.1128/mBio.00686-18>.
- Zhu, Wenhan, Maria G. Winter, Mariana X. Byndloss, Luisella Spiga, Breck A. Duerkop, Elizabeth R. Hughes, Lisa Büttner, et al. 2018. 'Precision Editing of the Gut Microbiota Ameliorates Colitis'. *Nature* 553 (7687): 208–11. <https://doi.org/10.1038/nature25172>.

## Supplementary Figures

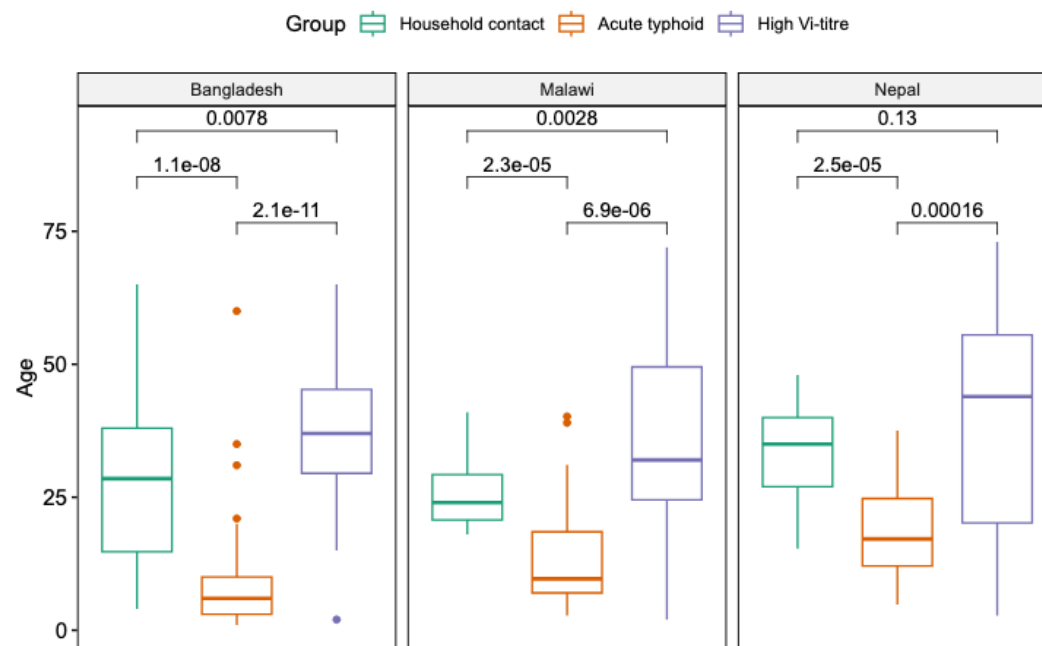

Supplementary Figure 1: Age distribution of participants in the healthy control, acute typhoid, and presumptive carrier groups, broken down by study site. Statistical annotations are the p-values resulting from Wilcoxon rank sum tests.

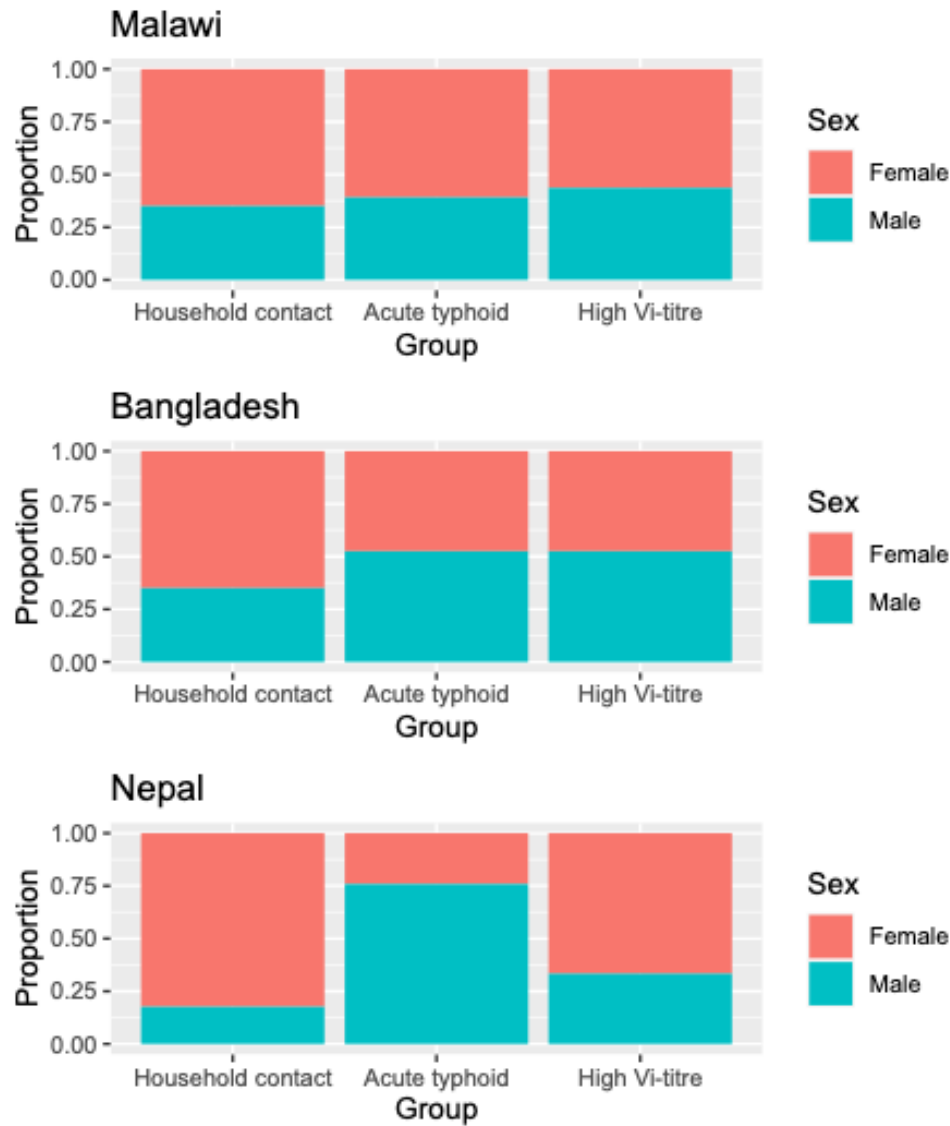

Supplementary Figure 2: Sex split of the different participant groups across the different sites.

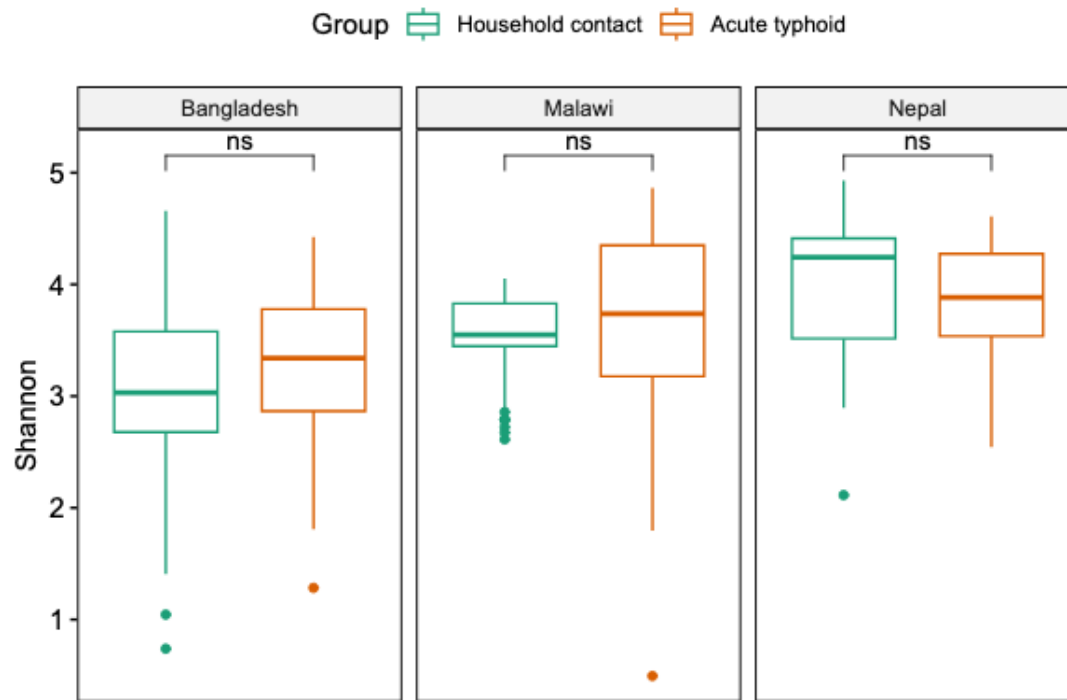

Supplementary Figure 3: Alpha diversity for acute typhoid fever patients and healthy household contacts for each endemic country study site.

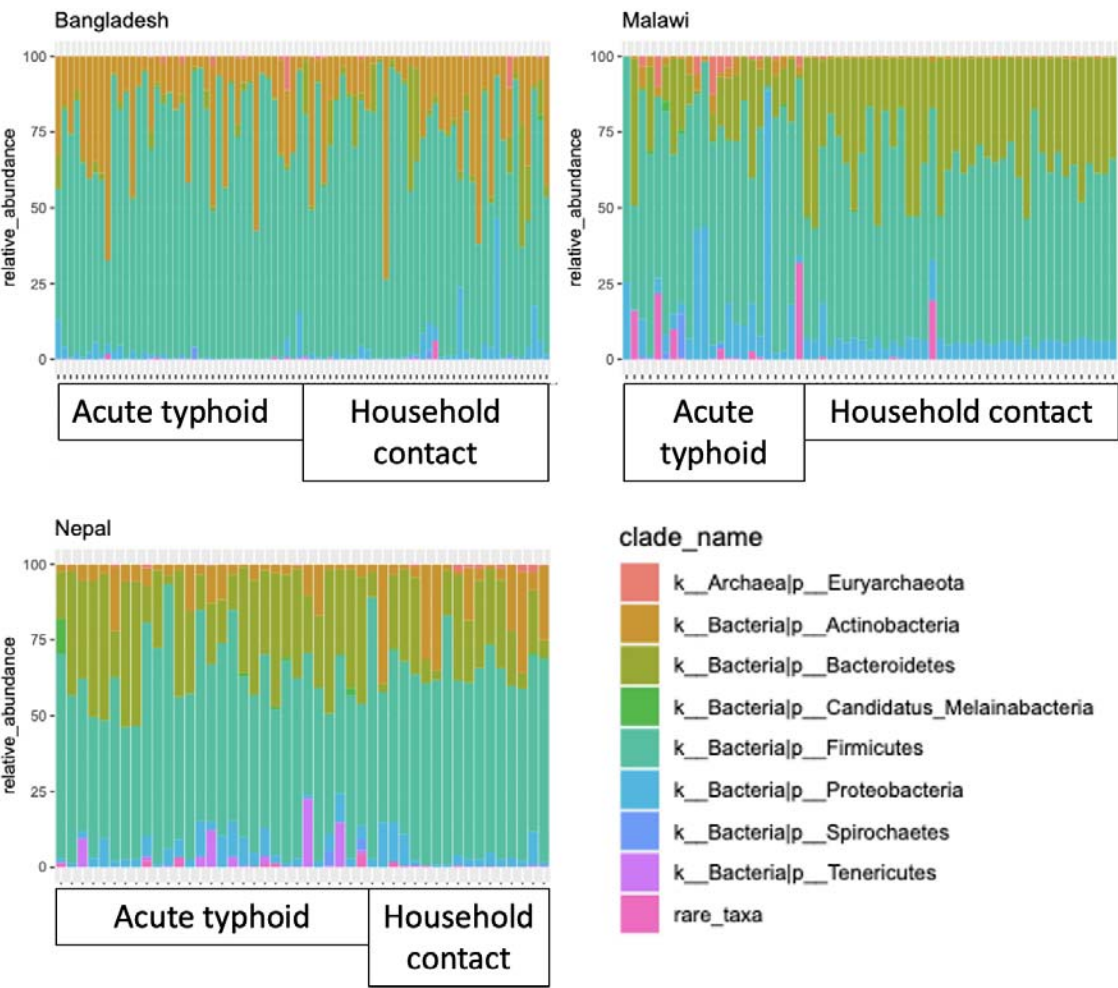

Supplementary Figure 4: Bar chart showing the prevalence of eight common phyla in acute typhoid patients and healthy household contacts, for each study site.

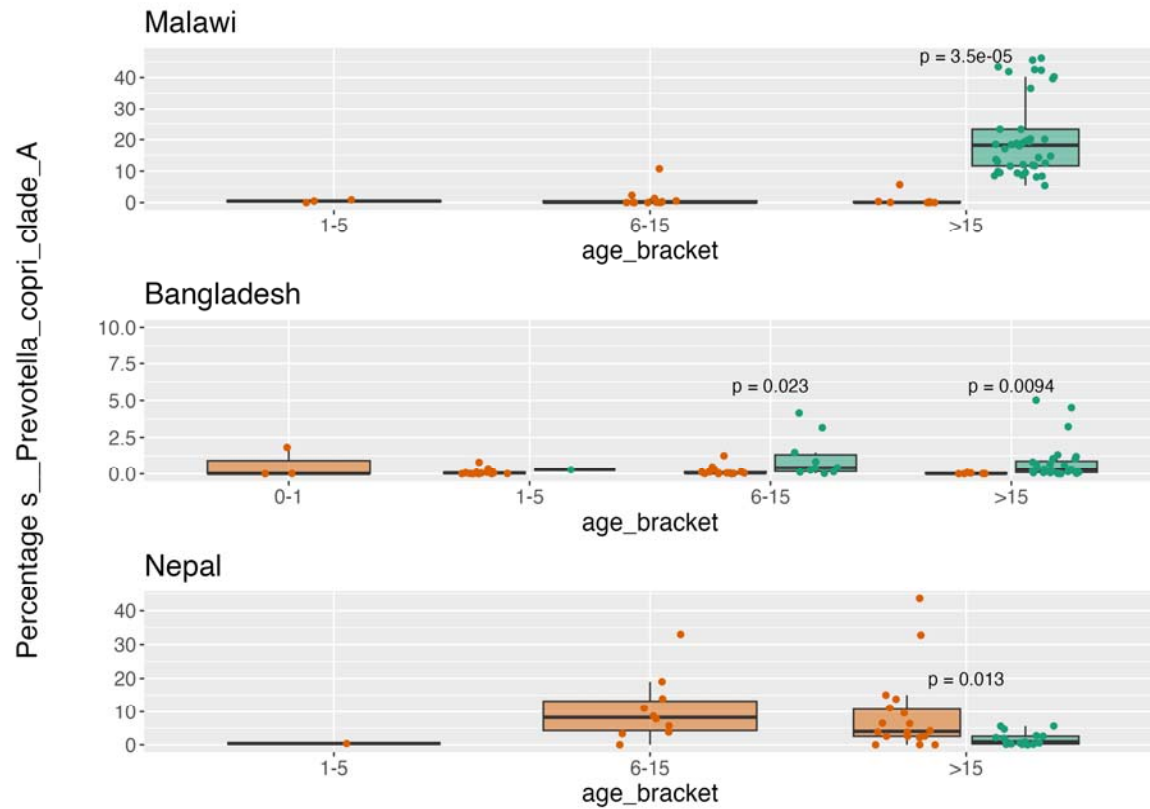

Supplementary Figure 5: Prevalence of *Prevotella copri* clade A across age brackets in Malawi, Bangladesh, and Nepal.



935

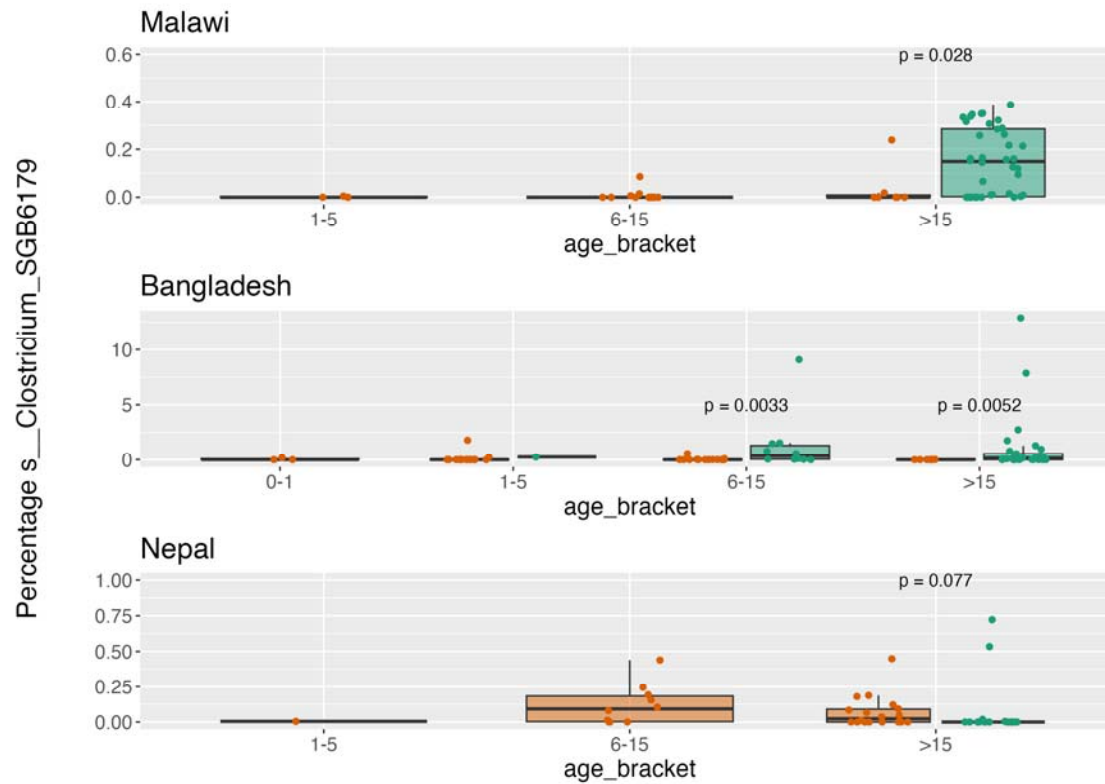

936

937

Supplementary Figure 6: Prevalence of *Clostridium* SGB6179 across age brackets in Malawi, Bangladesh, and Nepal

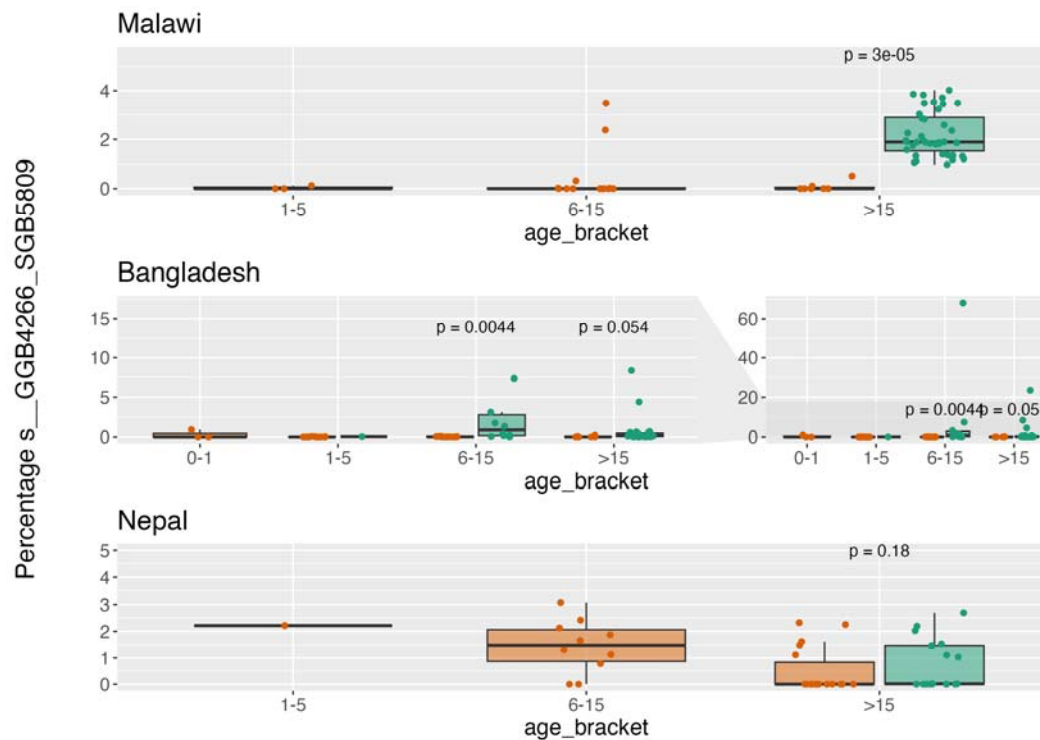

938

939

Supplementary Figure 7: Prevalence of GGB4266\_SGB5809 across age brackets in Malawi, Bangladesh, and Nepal



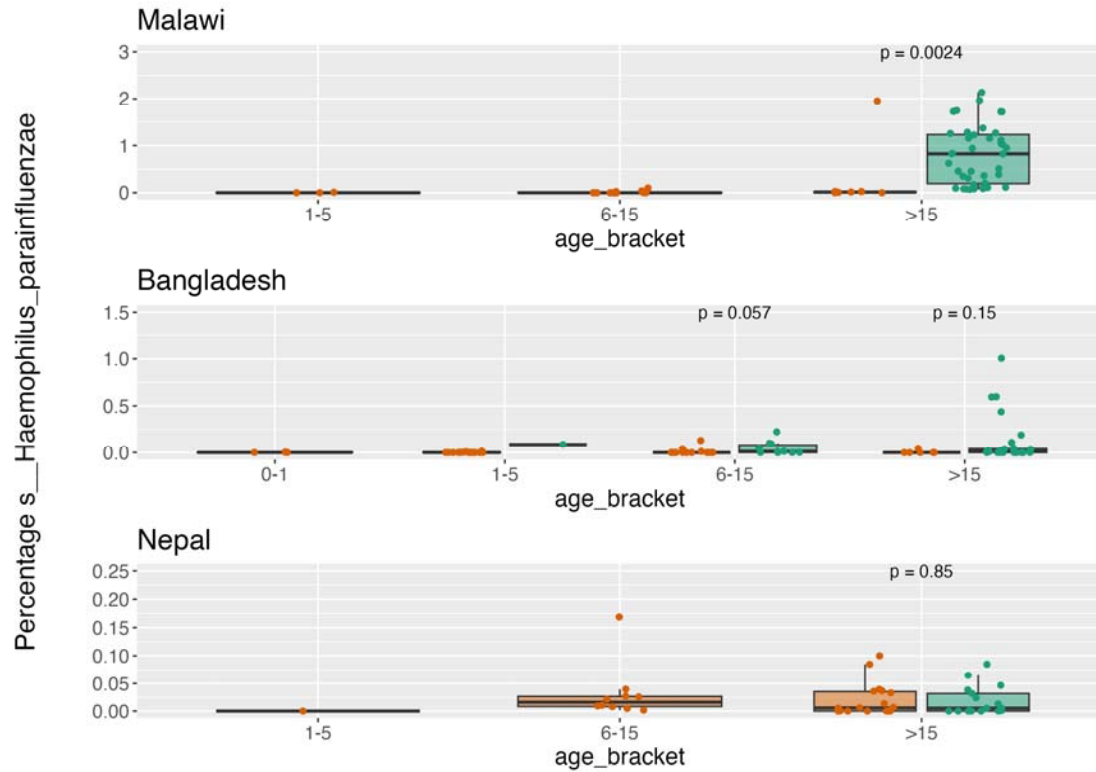

Supplementary Figure 8: Prevalence of *Haemophilus parainfluenzae* across age brackets in Malawi, Bangladesh, and Nepal

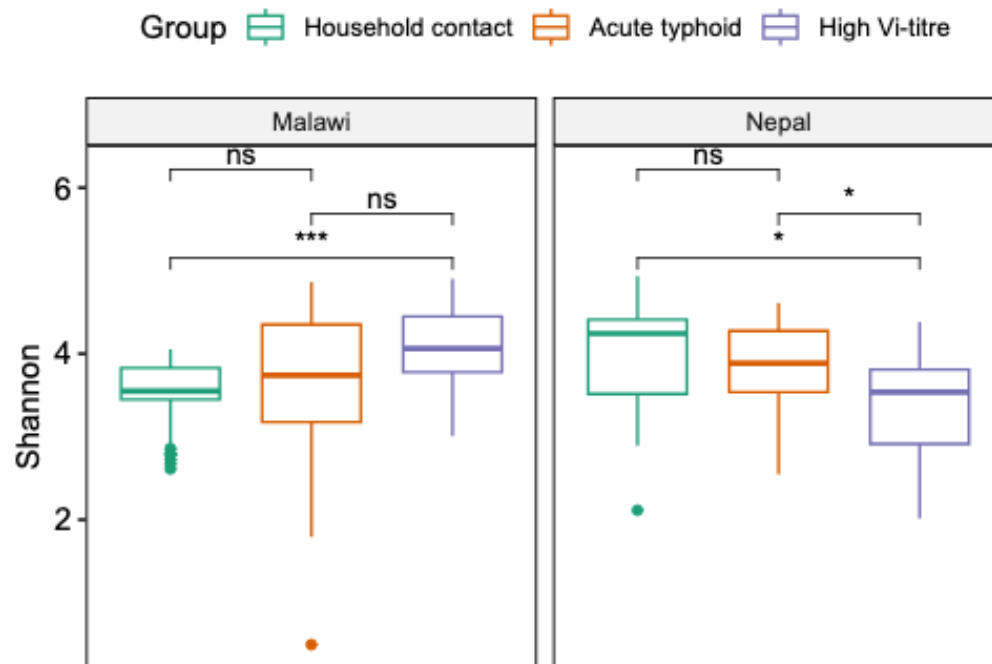

Supplementary Figure 9: Alpha diversity of acute typhoid patients, high Vi-titre participants, and household contacts from Malawi and Nepal. Statistical annotations are the p-values resulting from Wilcoxon rank sum tests. A single asterisk indicates a p-value < 0.01, triple asterisk indicates a p-value < 0.0001.

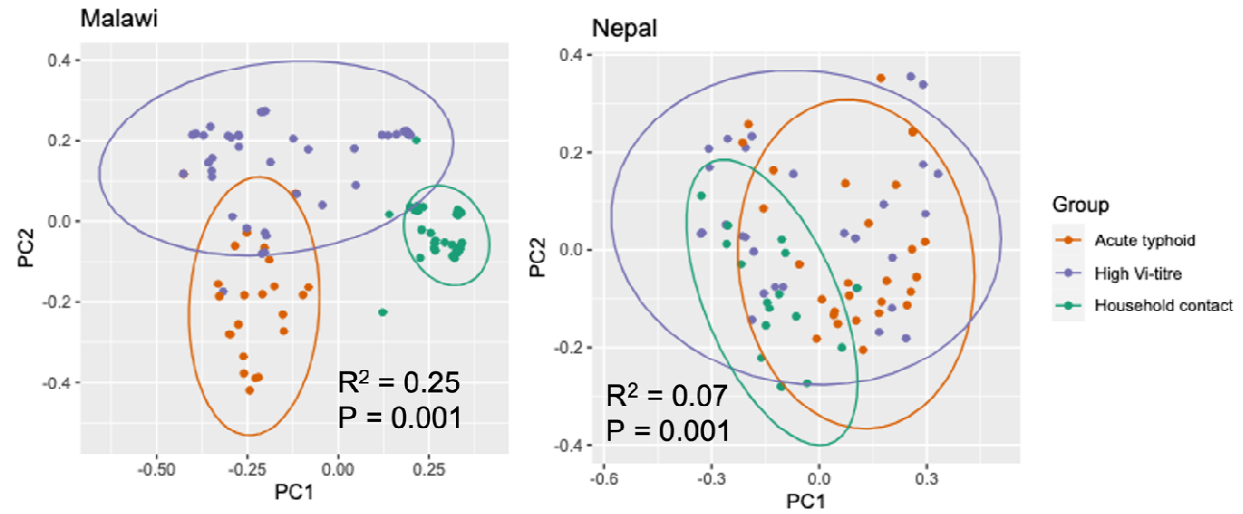

947

948

949

*Supplementary Figure 10: Beta diversity of acute typhoid fever, high Vi-titre participants, and household contacts from Malawi and Nepal*

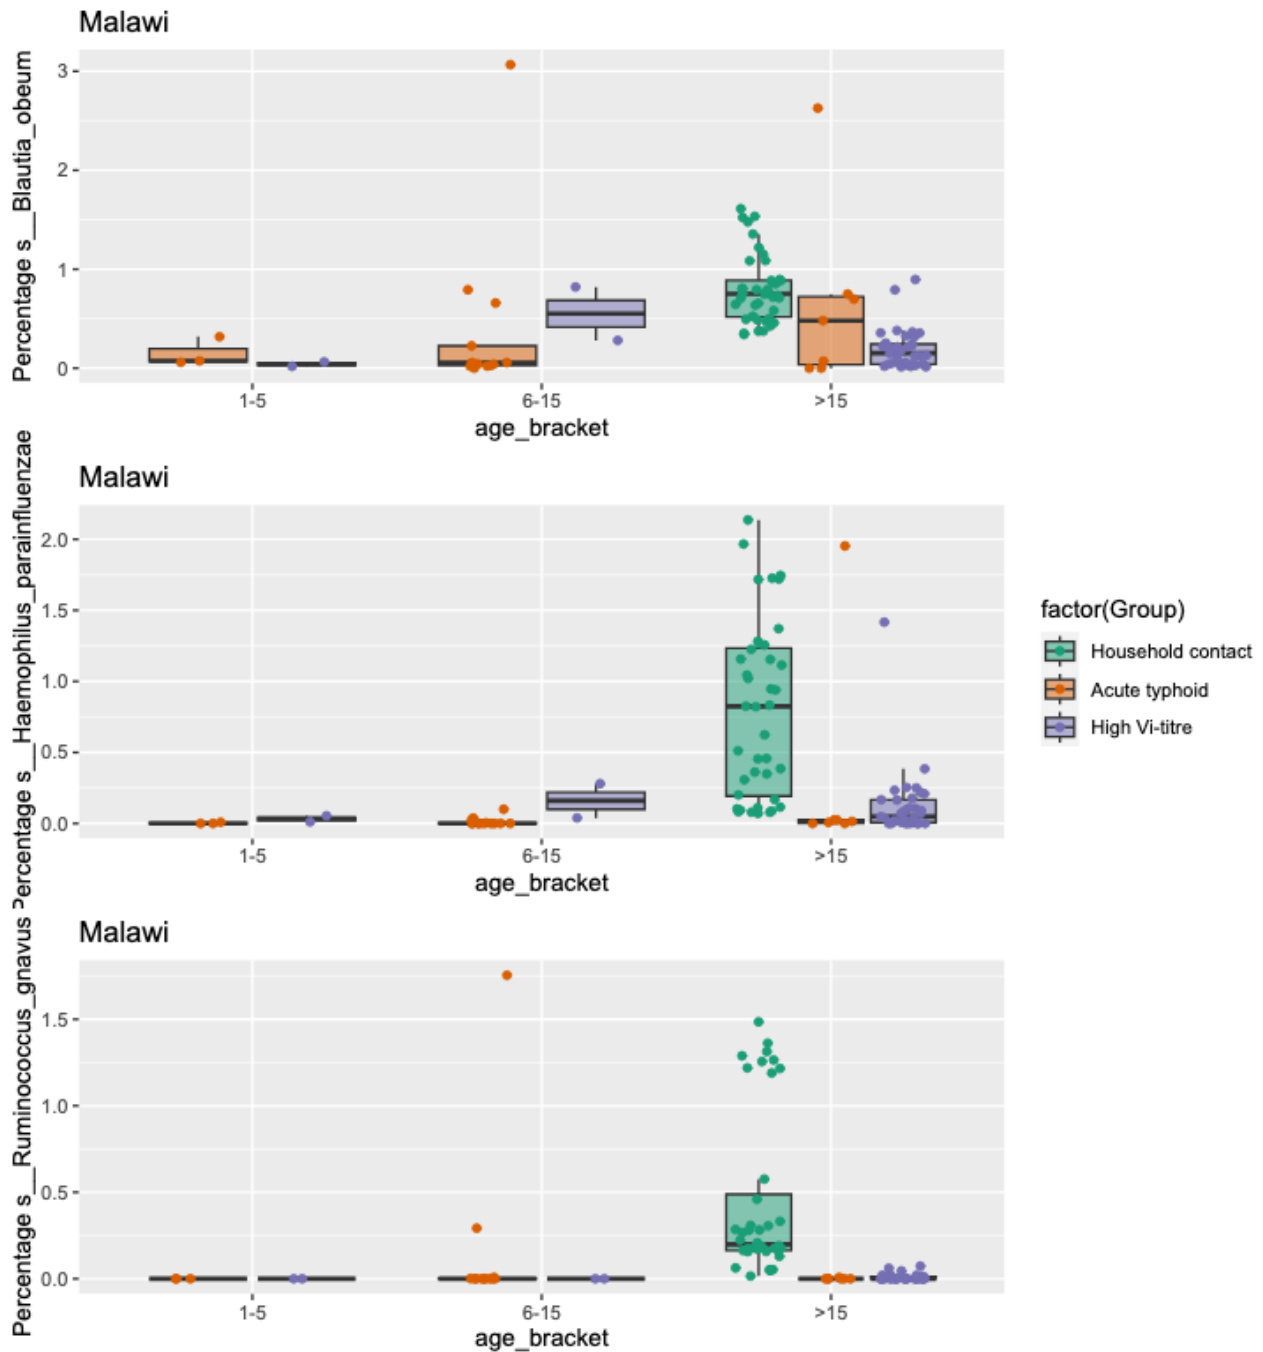

Supplementary Figure 11: Prevalence of *B. obeum*, *H. parainfluenzae*, and *R. gnavus* across three participant groups (household contacts, typhoid cases, and high Vi-titre) in Malawi.

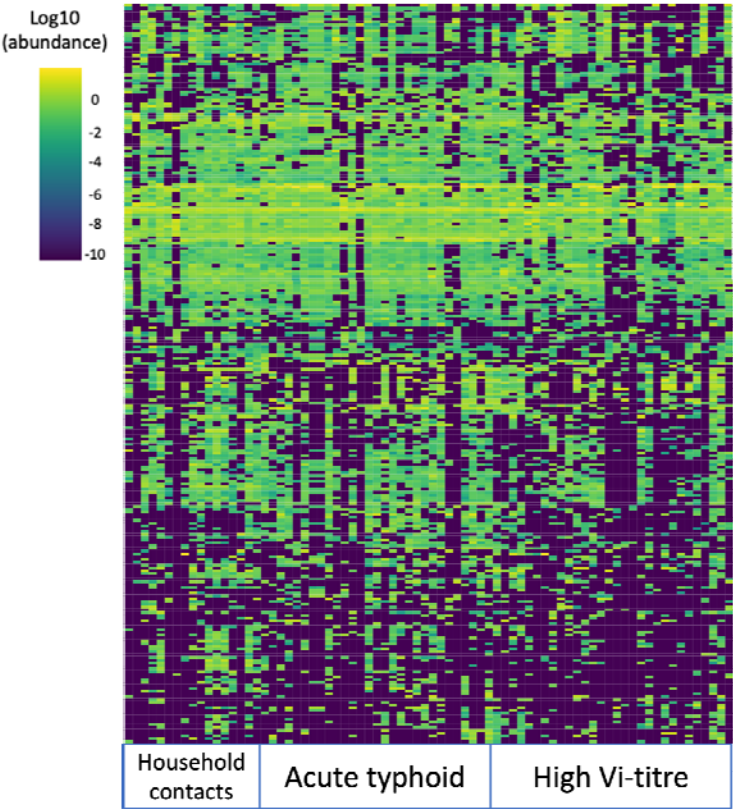

Supplementary Figure 12: Heatmap of top 400 taxa from Nepalese participants – household contacts, acute typhoid cases and high-Vi titre participants.

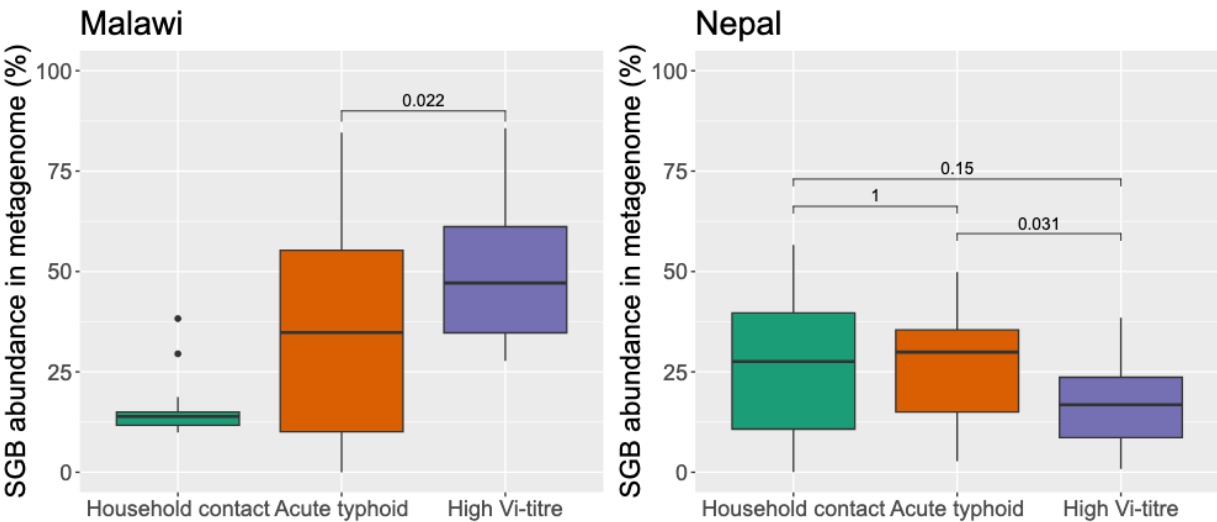

Supplementary Figure 13: The abundance of species only described as species genome bins in the metaphlan database from Malawian and Nepalese household contacts, acute typhoid, and high-Vi titre participants.

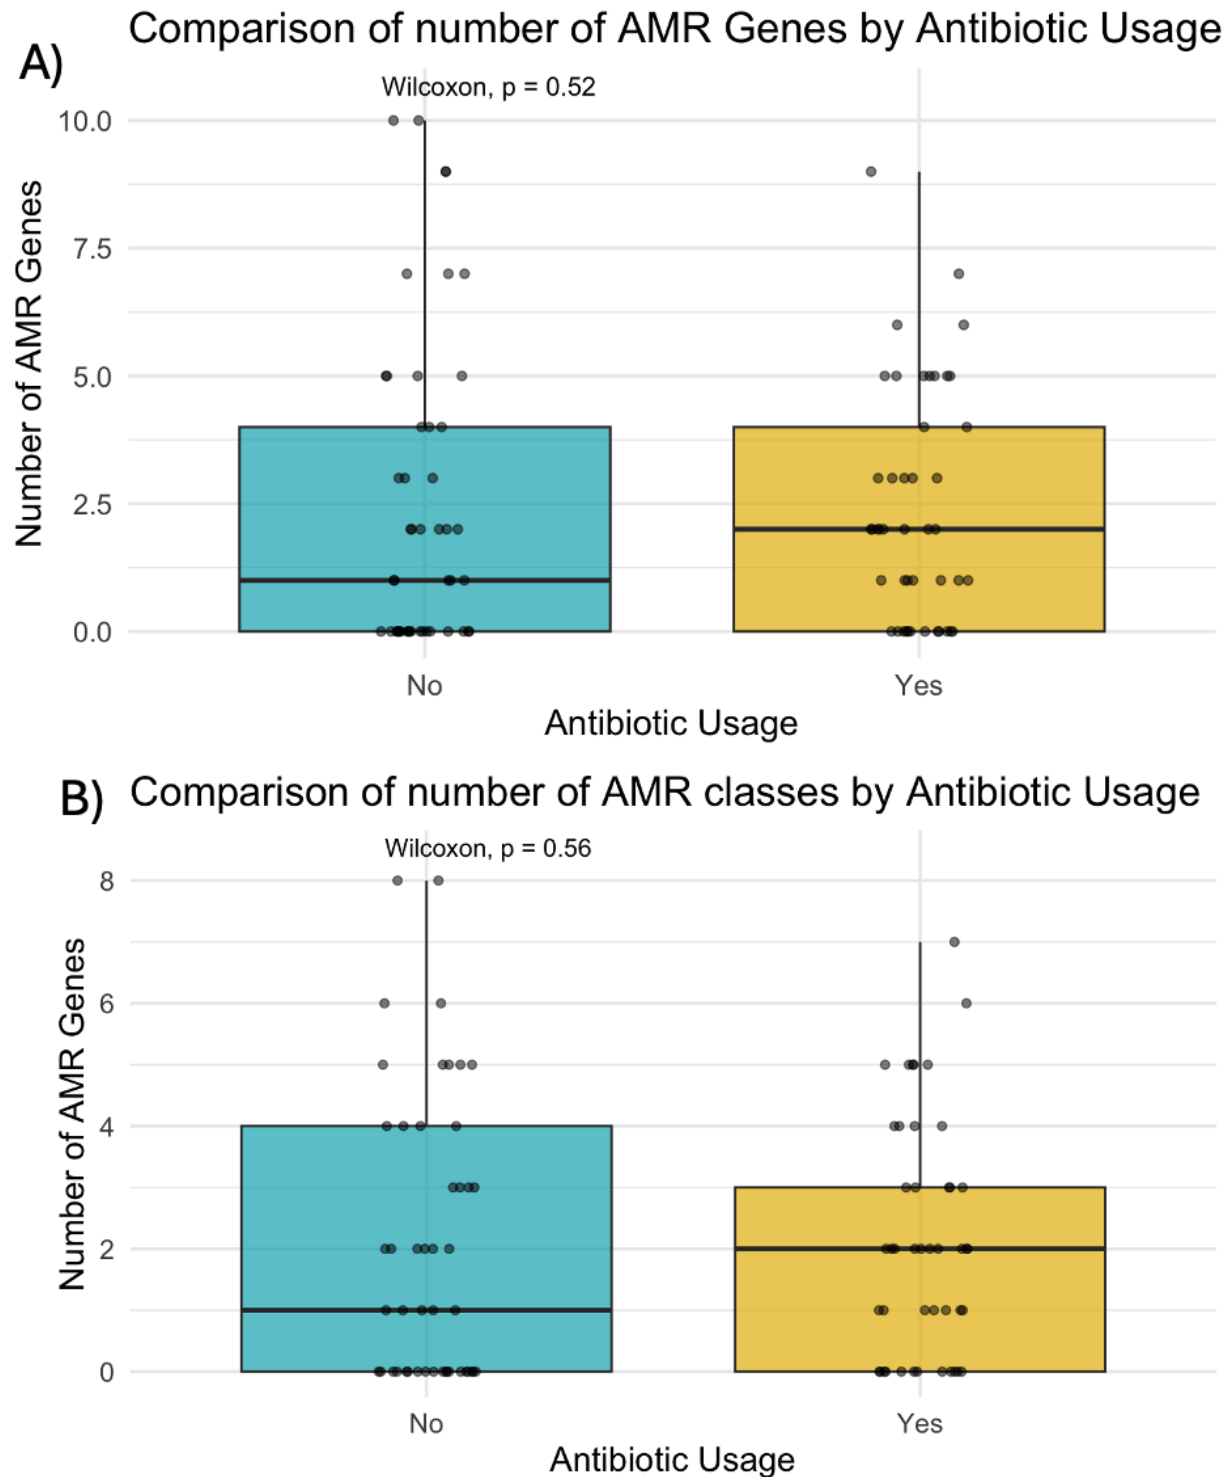

Supplementary Figure 14: Comparison of A) the number of AMR gene and B) the number of AMR gene classes identified in participants from all three sites who did and did not report antibiotic usage prior to sampling

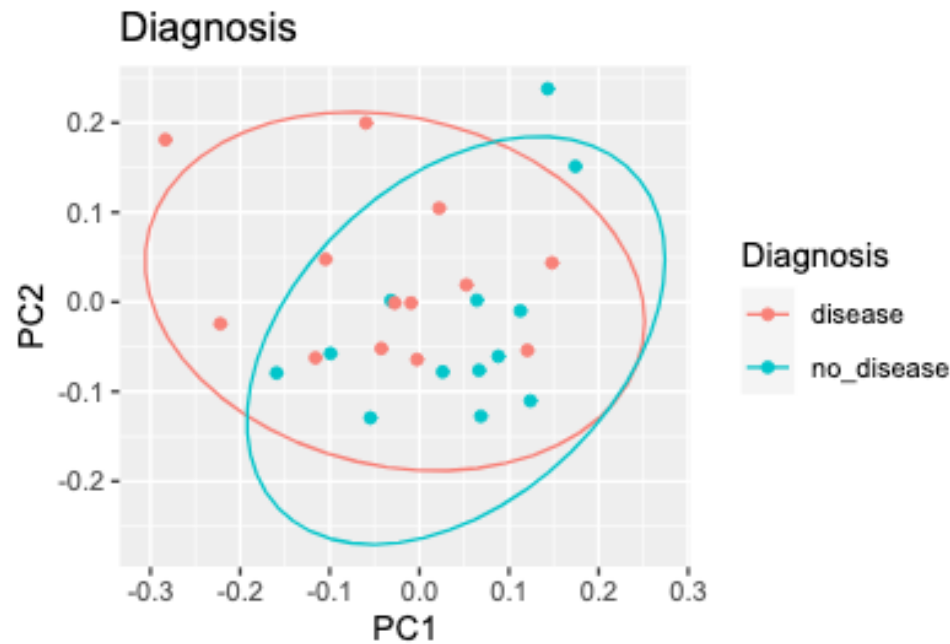

Supplementary Figure 15: Beta-diversity plot of 26 CHIM participants challenged with *S. Typhi* or *S. Paratyphi*, coloured by whether they were diagnosed with typhoid/paratyphoid fever following pathogen exposure.

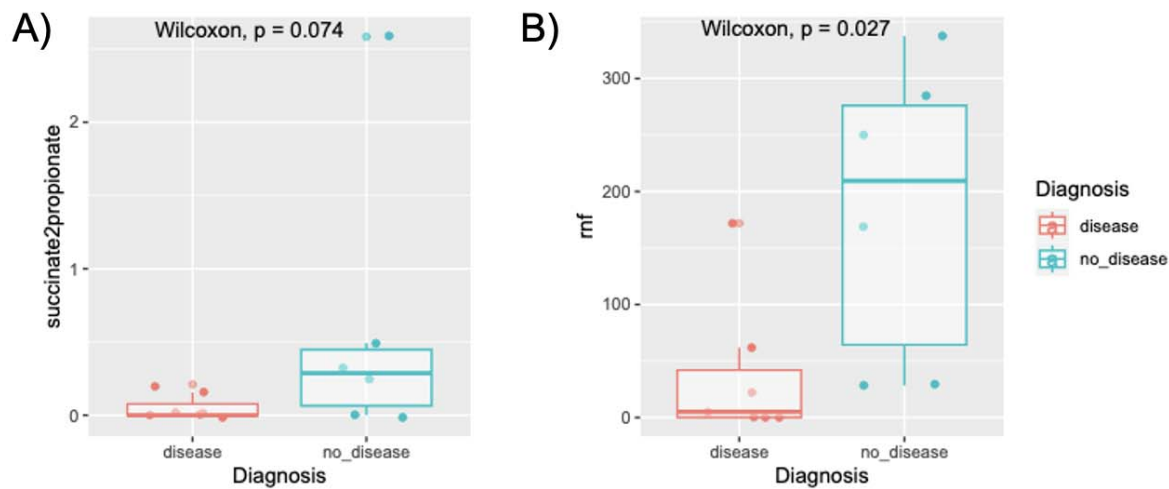

Supplementary Figure 16: Comparison of prevalence of A) succinate2propionate and B) rnf MGCs between people who were susceptible (disease) and non-susceptible (no\_disease) to challenge with *S. Typhi*.



# Supplementary Table captions

|      |                                                                                                                            |
|------|----------------------------------------------------------------------------------------------------------------------------|
| 974  |                                                                                                                            |
| 975  | <i>Supplementary Table 1: ANOVA analysis of alpha diversity from healthy household contacts and typhoid fever</i>          |
| 976  | <i>patients from all three sites</i>                                                                                       |
| 977  | <i>Supplementary Table 2: PERMANOVA analysis of beta diversity from healthy household contacts and typhoid fever</i>       |
| 978  | <i>patients from all three sites</i>                                                                                       |
| 979  | <i>Supplementary Table 3: PERMANOVA analysis of beta diversity from healthy household contacts and typhoid fever</i>       |
| 980  | <i>patients from all Bangladesh</i>                                                                                        |
| 981  | <i>Supplementary Table 4: PERMANOVA analysis of beta diversity from healthy household contacts and typhoid fever</i>       |
| 982  | <i>patients from Malawi</i>                                                                                                |
| 983  | <i>Supplementary Table 5: PERMANOVA analysis of beta diversity from healthy household contacts and typhoid fever</i>       |
| 984  | <i>patients from Nepal</i>                                                                                                 |
| 985  | <i>Supplementary Table 6: Median proportion of reads assigned to different phyla from healthy household contacts and</i>   |
| 986  | <i>typhoid fever patients from all three sites</i>                                                                         |
| 987  | <i>Supplementary Table 7: Species associated with health or disease in Bangladesh only. Positive co-efficient (coef)</i>   |
| 988  | <i>means the species is associated with health, negative co-efficient means it's associated with typhoid fever.</i>        |
| 989  | <i>Supplementary Table 8: Species associated with health or disease in Malawi only. Positive co-efficient (coef) means</i> |
| 990  | <i>the species is associated with health, negative co-efficient means it's associated with typhoid fever.</i>              |
| 991  | <i>Supplementary Table 9: Full information about Metabolic Gene Clusters associated with health in both Bangladesh</i>     |
| 992  | <i>and Malawi.</i>                                                                                                         |
| 993  | <i>Supplementary Table 10: ANOVA analysis of alpha diversity from healthy household contacts, typhoid fever patients,</i>  |
| 994  | <i>and high Vi-titre participants from Malawi and Nepal</i>                                                                |
| 995  | <i>Supplementary Table 11: PERMANOVA analysis of beta diversity from healthy household contacts, typhoid fever</i>         |
| 996  | <i>patients, and high Vi-titre participants from Malawi</i>                                                                |
| 997  | <i>Supplementary Table 12: PERMANOVA analysis of beta diversity from healthy household contacts, typhoid fever</i>         |
| 998  | <i>patients, and high Vi-titre participants from Nepal</i>                                                                 |
| 999  | <i>Supplementary Table 13: Species associated with high-Vi titre compared with household controls in Malawi only.</i>      |
| 1000 | <i>Positive coefficient (coef) is associated with health, negative co-efficient is associated with high-Vi titre.</i>      |
| 1001 | <i>Supplementary Table 14: Metagenome identification of AMR genes commonly identified in Salmonella Typhi per</i>          |
| 1002 | <i>country</i>                                                                                                             |
| 1003 | <i>Supplementary Table 15: Metagenome identification of AMR genes commonly identified in Salmonella Typhi per</i>          |
| 1004 | <i>participant group</i>                                                                                                   |
| 1005 | <i>Supplementary Table 16: The average weighted importance of species to random forest classification of samples as</i>    |
| 1006 | <i>being from control or presumptive carrier participants.</i>                                                             |
| 1007 | <i>Supplementary Table 17: The correlation between the proportion of S. Typhi isolates and the proportion of</i>           |
| 1008 | <i>microbiome samples from each site with AMR genes to quinolones, sulphonamides and tetracycline.</i>                     |
| 1009 | <i>Supplementary Table 18: Demographic information on CHIM participants</i>                                                |
| 1010 | <i>Supplementary Table 19: Alpha diversity ANOVA results for CHIM data</i>                                                 |
| 1011 | <i>Supplementary Table 20: PERMANOVA analysis of beta-diversity amongst CHIM participants challenged with S.</i>           |
| 1012 | <i>Typhi and S. Paratyphi</i>                                                                                              |
| 1013 | <i>Supplementary Table 21: Species associated with household controls vs both typhoid fever and high Vi titre from</i>     |
| 1014 | <i>Malawi.</i>                                                                                                             |

|      |                                                                                                                               |
|------|-------------------------------------------------------------------------------------------------------------------------------|
| 1015 | <i>Supplementary Table 22: SGBs identified in Malawi</i>                                                                      |
| 1016 | <i>Supplementary Table 23: Associations between MGCs belonging to classes identified associated with household</i>            |
| 1017 | <i>controls compared with acute typhoid cases and no disease following challenge in the CHIM</i>                              |
| 1018 | <i>Supplementary Table 24: MGCs significantly different between household contacts and typhoid cases in Nepal</i>             |
| 1019 | <i>Supplementary Table 25: MGCs significantly different between household contacts and typhoid cases in Bangladesh</i>        |
| 1020 | <i>Supplementary Table 26: MGCs significantly different between household contacts and typhoid cases in Malawi</i>            |
| 1021 | <i>Supplementary Table 27: Endemic country cohort participant information</i>                                                 |
| 1022 | <i>Supplementary Table 28: metadata on CHIM samples</i>                                                                       |
| 1023 | <i>Supplementary Table 29: The prevalence and abundance of species in the CHIM that were associated with typhoid</i>          |
| 1024 | <i>fever in Malawi and Bangladesh</i>                                                                                         |
| 1025 | <i>Supplementary Table 30: Combined results of maaslin analysis of MGC types in four cohorts (Bangladesh, Malawi,</i>         |
| 1026 | <i>Nepal, CHIM). Column headings indicate which cohort specific results are from mal is Malawi, bgd is Bangladesh,</i>        |
| 1027 | <i>nep is Nepal, and patch is the CHIM. If a result is NA, then there was insufficient of the MGC type identified in that</i> |
| 1028 | <i>cohort for maaslin analysis.</i>                                                                                           |
